# Supplementary material
Source: Royal Society of Chemistry journal article supplement (doi:10.1039/d6cc02089e)

## Supporting Information

# Inhibition of Mincle signaling by chemically synthesized disaccharide-type 6-*O*-acylated steryl $\beta$ -glucosides ( $\beta$ ASGs) and their analogues derived from plants

Kenji Yoshida, Takanori Matusmaru, Sho Yamasaki, and Yukari Fujimoto\*

*E-mail: fujimotoy@keio.jp*

### Table of Contents

|                      |       |
|----------------------|-------|
| Figures and scheme   | 2-6   |
| Experimental section | 7-27  |
| NMR Spectra          | 28-63 |

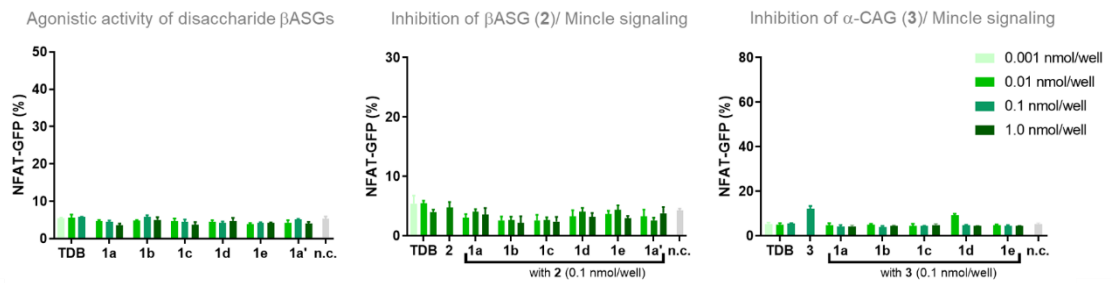

**Fig. S1.** Mincle-mediated signaling activity of ASGs by using 2B4 NFAT-GFP reporter cells expressing FcR $\gamma$  alone. The cells were incubated on a plate with the ligands, TDB, or  $\alpha$ -PrOH as a negative control at 36 °C for 18 h. GFP expression was evaluated by flowcytometry.

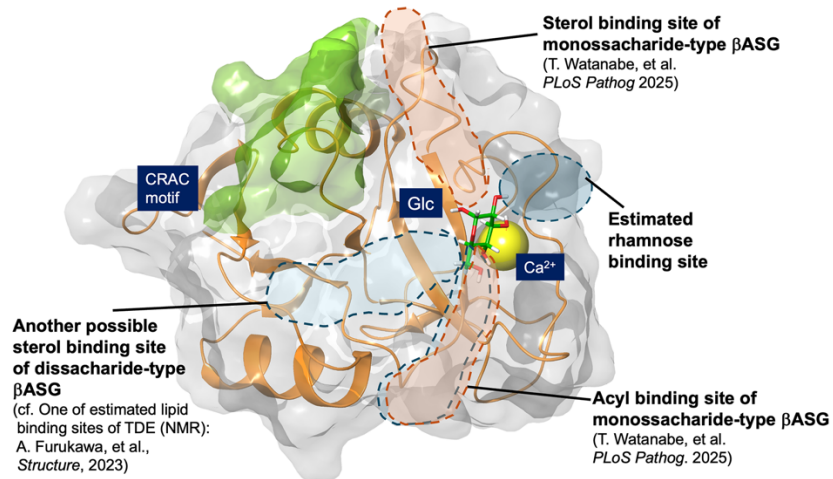

**Fig. S2.** Proposed model for Mincle binding sites of disaccharide  $\beta$ ASG. Orange dotted areas were previously proposed for monosaccharide-type  $\beta$ ASG (AEG) by Watanabe et al. (AlphaFold2 model).<sup>1</sup> Blue dotted-areas are predicted from another model based on the docking simulation of monosaccharide-type  $\beta$ ASG based on a Mincle model,<sup>2</sup> whose area is also proposed by NMR analysis of a lipid moiety of TDE.<sup>3</sup>

HMQC (CDCl<sub>3</sub>)

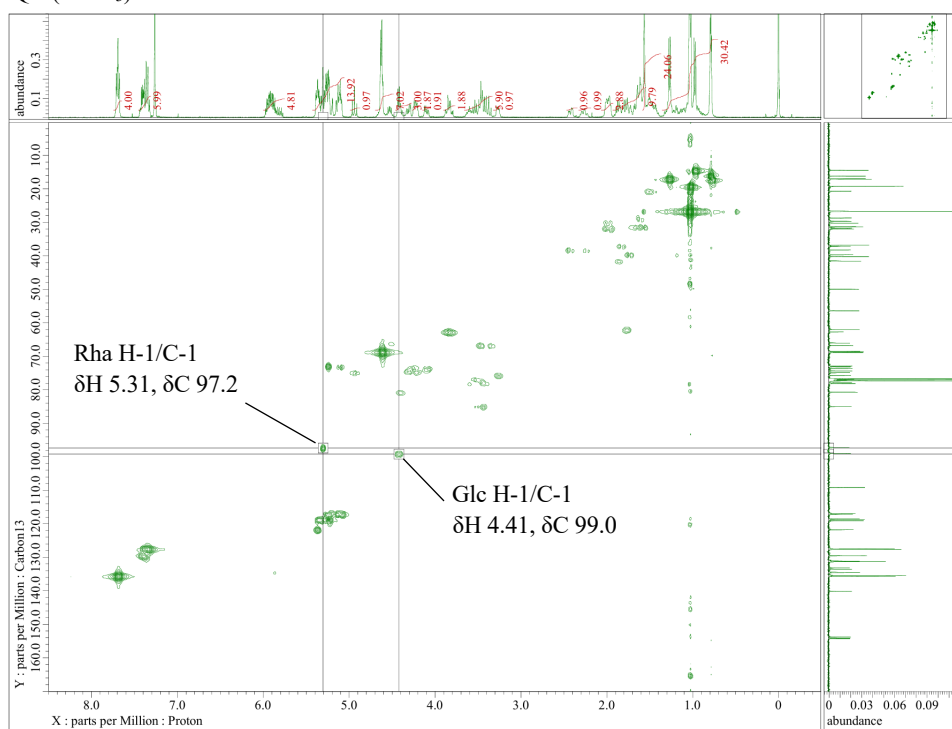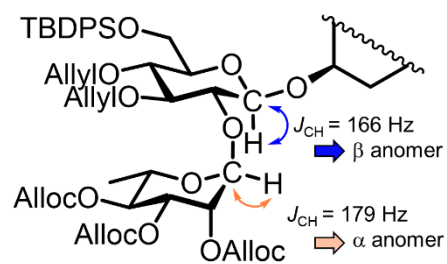

Compound 6a

**Fig. S3.** Confirmation of stereochemistry<sup>4</sup> of compound **6a**.

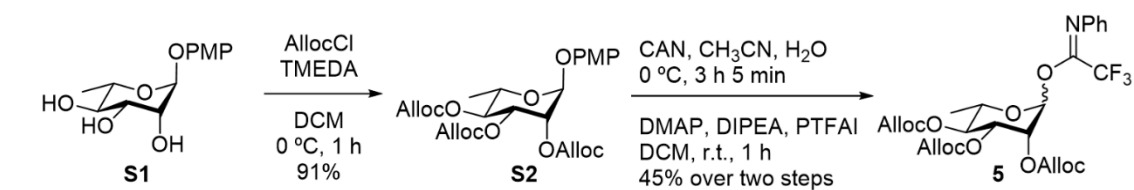

**Scheme S1.** Synthesis of compound **5**

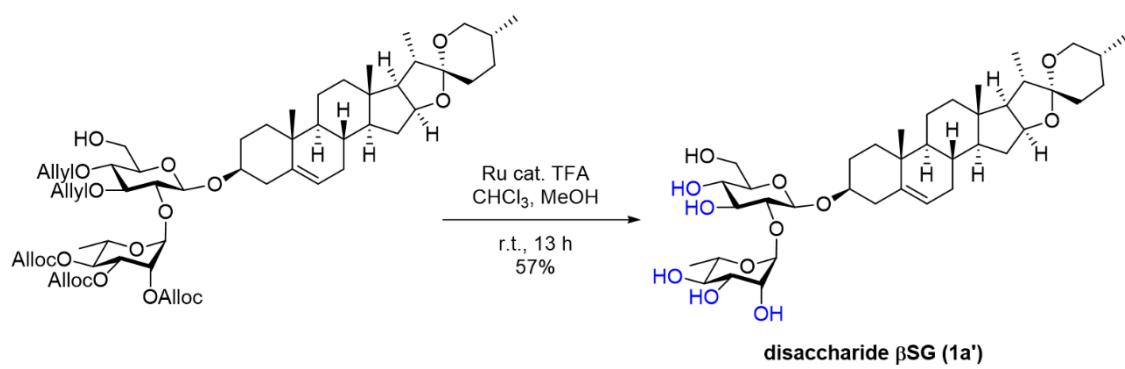

**Scheme S2.** Synthesis of disaccharide  $\beta$ SG (1a')

## Experimental section

### 1. Synthesis

**General procedures:** Nuclear magnetic resonance ( $^1\text{H}$  NMR,  $^{13}\text{C}$  NMR) spectra were measured in an indicated solvent with JEOL ECX-400, JEOL ECS-400 spectrometer ( $^1\text{H}$  NMR: 400 MHz,  $^{13}\text{C}$  NMR: 100 MHz). Chemical shifts are reported in parts per million ( $\delta$ ) relative to TMS as an internal standard. High-resolution mass spectra (HRMS) of synthetic compounds were obtained on an electrospray ionization quadrupole time of flight (ESI-QTOF) mass spectrometer (micro TOF-QII-HC; BRUKER). Analytical thin-layer chromatography (TLC) was performed on Silica gel 60 F<sub>254</sub> Plates (Merck, 0.25 mm thickness). Silica gel column chromatography was performed using Silica gel 60 N (Kanto Chemical Co., 40–50  $\mu\text{m}$ ) using indicated solvent systems. Concentration of solutions was performed under reduced pressure using a rotary evaporator. Decahydro-2-naphthol was purchased from Tokyo Chemical Industry (Product Number: D2000) and used as received as an isomeric mixture. Ru catalyst (Ru cat.) refers to  $[\text{CpRu}(\text{CH}_3\text{CN})_3]\text{PF}_6$  in combination with quinaldic acid<sup>5</sup>.

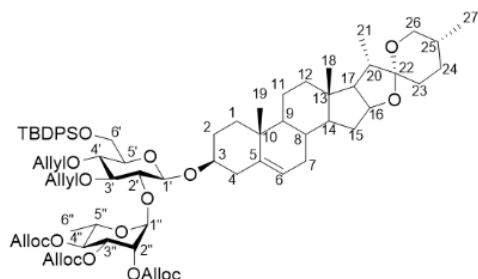

#### Diosgenyl (2'',3'',4''-O-trialloc- $\alpha$ -L-rhamnopyranosyl)- $\alpha$ (1 $\rightarrow$ 2)-3',4'-O-diallyl-6'-O-tert-butyl diphenylsilyl- $\beta$ -D-glucopyranoside (**6a**)

After **compound 4a** (163 mg, 181  $\mu\text{mol}$ ) and **compound 5** (227 mg, 386  $\mu\text{mol}$ ) were co-evaporated with toluene four times, and dried over under reduced pressure, MS4A (115 mg) was added in  $\text{CH}_2\text{Cl}_2$  (2.5 mL). To the mixture was added TMSOTf (8.2  $\mu\text{L}$ , 45  $\mu\text{mol}$ ) and the mixture was stirred at 0  $^\circ\text{C}$  for 30 min and then at r.t. for an additional 30 min. Et<sub>3</sub>N (1 drop) was added and the reaction mixture was stirred for 30 min at r.t., filtered through a PTFE membrane filter (0.5  $\mu\text{m}$ , Advantec) and concentrated. The residue was purified by silica gel column chromatography (*n*-hexane/Et<sub>2</sub>O=6/1-3/1) twice to afford **compound 6a** (221.37 mg, 95%) as colorless oil;  $[\alpha]_{\text{D}}^{25}$  -30.8 (*c* 1.08,  $\text{CHCl}_3$ );  $^1\text{H}$ -NMR ( $\text{CDCl}_3$ )  $\delta$  7.71–7.67 (m, 4H, Ar-H of TBDPS), 7.44–7.33 (m, 6H, Ar-H of TBDPS), 5.98–5.77 (m, 5H, -CH= of alloc, -CH= of allyl), 5.39–5.34 (m, =CH<sub>2</sub> of alloc), 5.33–5.23 (m, 7H, =CH<sub>2</sub> of alloc, =CH<sub>2</sub> of allyl, H-1'', H-2'') 5.20–5.15 (m, 1H, =CH<sub>2</sub> of allyl) 5.13–5.09 (m, 3H, =CH<sub>2</sub> of allyl, H-3''), 4.94 (dd, *J* = 10.0, 10.0 Hz, 1H, H-4''), 4.63–4.61 (m, 6H, -CH<sub>2</sub>- of alloc), 4.56–4.49 (m, 1H, H-5''), 4.43–4.38 (m, 2H, H-1', H-16), 4.31 (dd, *J* = 12.6, 5.8 Hz, 1H, -CH<sub>2</sub>- allyl), 4.25–4.21 (m, 2H, -CH<sub>2</sub>-

allyl), 4.10 (dd,  $J = 12.2, 5.2$  Hz, 1H,  $-\text{CH}_2-$  allyl), 3.88–3.79 (m, 2H, H-6'), 3.64–3.35 (m, 6H, H-2', H-3', H-4', H-3, H-26), 3.28–3.25 (m, 1H, H-5'), 2.44–2.41 (m, 1H, H-4), 2.29–2.23 (m, 1H, H-4), 2.00–1.97 (m, 3H, H-15, H-20), 1.89–1.73 (m, 4H, H-1, H-8, H-12, H-17), 1.69–1.43 (m, 9H, H-2, H-11, H-23, H-24, H-25), 1.33–1.26 (m, 5H, H-6', H-7), 1.23–1.06 (m, 3H, H-1, H-12, H-14), 1.04–1.02 (m, 12H, H-19,  $-\text{CH}_3$  of TBDPS), 0.98–0.88 (m, 4H, H-9, H-21), 0.79 (m, 6H, H-18, H-27);  $^{13}\text{C}$ -NMR ( $\text{CDCl}_3$ )  $\delta$  154.3 (C=O of alloc), 154.1 (C=O of alloc), 153.8 (C=O of alloc), 140.2 (C-5), 135.7 (*o*-Ph of TBDPS), 135.5 (*o*-Ph of TBDPS), 134.5 ( $=\text{CH}_2$  of allyl), 134.4 ( $=\text{CH}_2$  of allyl), 133.5 (*ipso*-Ph of TBDPS), 133.1 (*ipso*-Ph of TBDPS), 131.3 ( $=\text{CH}_2$  of alloc), 131.1 ( $=\text{CH}_2$  of alloc), 129.5 (*p*-Ph of TBDPS), 129.5 (*p*-Ph of TBDPS), 127.6 (*m*-Ph of TBDPS), 127.5 (*m*-Ph of TBDPS), 121.7 (C-6), 119.1 ( $-\text{CH}=\text{ of alloc$ ), 118.7 ( $-\text{CH}=\text{ of alloc$ ), 118.5 ( $-\text{CH}=\text{ of alloc$ ), 117.2 ( $-\text{CH}=\text{ of allyl$ ), 117.0 ( $-\text{CH}=\text{ of allyl$ ), 109.2 (C-22), 99.0 (C-1',  $J_{\text{CH}} = 179$  Hz,  $\alpha$  anomer), 97.2 (C-1'',  $J_{\text{CH}} = 166$  Hz,  $\beta$  anomer), 85.0 (C-2'), 80.7 (C-16), 78.1 (C-4'), 77.9 (C-3'), 76.9 (C-5'), 75.7 (C-4''), 74.9 (C-3), 74.4 ( $-\text{CH}_2-$  of allyl), 73.6 ( $-\text{CH}_2-$  of allyl), 73.1 (C-3''), 72.9 (C-2''), 68.8 ( $-\text{CH}_2-$  of alloc), 68.7 ( $-\text{CH}_2-$  of alloc), 68.5 ( $-\text{CH}_2-$  of alloc), 66.7 (C-26), 66.0 (C-5''), 62.7 (C-6'), 62.0 (C-17), 56.4 (C-14), 50.0 (C-9), 41.5 (C-4), 40.2 (C-20), 39.7 (C-13), 38.2 (C-12), 37.2 (C-1), 36.8 (C-10), 32.0 (C-7), 31.8 (C-15), 31.3 (C-2), 31.3 (C-8), 30.2 (C-23), 29.7 (C-25), 28.7 (C-24), 26.7 (C-11), 20.7 ( $-\text{CH}_3$  of TBDPS), 19.2 (C-19), 17.1 (C-6''), 17.0 (C-27), 16.2 (C-18), 14.5 (C-21); HRMS (ESI-QTOF) calcd. for  $\text{C}_{73}\text{H}_{100}\text{NaO}_{18}\text{Si}$   $[\text{M}+\text{Na}]^+$  1315.6571; found: 1315.6563.

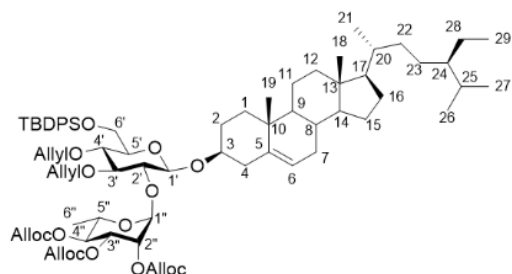

**$\beta$ -sitosteryl (2'',3'',4''-*O*-trialloc- $\alpha$ -L-rhamnopyranosyl)-  $\alpha$ (1 $\rightarrow$ 2)-3',4'-*O*-diallyl-6'-*O*-tert-butyl diphenylsilyl- $\beta$ -D-glucopyranoside (6b)**

After **compound 4b** (59.6 mg, 66.5  $\mu\text{mol}$ ) and **compound 5** (59.2 mg, 101  $\mu\text{mol}$ ) were co-evaporated with toluene four times, and dried over under reduced pressure, MS4A (33.8 mg) was added in  $\text{CH}_2\text{Cl}_2$  (636  $\mu\text{L}$ ). To the mixture was added TMSOTf (2.0  $\mu\text{L}$ , 11  $\mu\text{mol}$ ) and the mixture was stirred at 0  $^\circ\text{C}$  for 30 min and then at r.t. for an additional 30 min. Et<sub>3</sub>N (1 drop) was added and the reaction mixture was stirred for 30 min at r.t., filtered through a PTFE membrane filter (0.5  $\mu\text{m}$ , Advantec) and concentrated. The residue was purified by silica gel column chromatography (n-hexane/Et<sub>2</sub>O=8/1–Et<sub>2</sub>O) to give a mixture, and the obtained mixture was further purified by silica gel column chromatography (n-hexane/Et<sub>2</sub>O=20/1–10/1) to afford **compound 6b** (42.8 mg, 82%) as a white foam;

$[\alpha]_D^{25}$  -2.64 (c 1.03,  $\text{CHCl}_3$ );  $^1\text{H-NMR}$  ( $\text{CDCl}_3$ )  $\delta$  7.70 (dd,  $J = 12.4, 2.2$  Hz, 4H, Ar-H of TBDPS), 7.43–7.33 (m, 6H, Ar-H of TBDPS), 5.98–5.78 (m, 5H, -CH= of alloc, -CH= of allyl), 5.38–5.35 (m, 3H, H-6, =CH<sub>2</sub> of alloc), 5.32–5.24 (m, 7H, =CH<sub>2</sub> of allyl, =CH<sub>2</sub> of alloc, H-1'', H-2''), 5.20–5.16 (m, 1H, =CH<sub>2</sub> of allyl), 5.13–5.09 (m, 3H, =CH<sub>2</sub> of allyl, H-3''), 4.94 (dd,  $J = 10.4, 10.4$  Hz, 1H, H-4''), 4.63–4.62 (m, 6H, -CH<sub>2</sub>- of alloc), 4.53 (dd,  $J = 10.2, 6.6$  Hz, 1H, H-5''), 4.43 (d,  $J = 7.2$  Hz, 1H, H-1'  $\beta$ -anomer), 4.31 (dd,  $J = 12.6, 5.4$  Hz, 1H, -CH<sub>2</sub>- of allyl), 4.25–4.21 (m, 2H, -CH<sub>2</sub>- of allyl), 4.10 (dd,  $J = 12.6, 5.8$  Hz, 1H, -CH<sub>2</sub>- of allyl), 3.88–3.79 (m, 2H, H-6'), 3.62–3.41 (m, 4H, H-2', H-3', H-4', H-3), 3.28–3.25 (m, 1H, H-5'), 2.44–2.39 (m, 1H, H-4), 2.29–2.22 (m, 1H, H-4), 2.03–1.97 (m, 3H, -CH<sub>2</sub>- of  $\beta$ -sitosterol), 1.86–1.82 (m, 2H, -CH<sub>2</sub>- of  $\beta$ -sitosterol), 1.71–1.42 (m, 9H, -CH and -CH<sub>2</sub>- of  $\beta$ -sitosterol), 1.36–1.00 (m, 25H, H-6'', -CH<sub>3</sub> of TBDPS, -CH and -CH<sub>2</sub>- of  $\beta$ -sitosterol), 0.93–0.81 (m, 15H, -CH<sub>3</sub> of  $\beta$ -sitosterol), 0.68 (s, 3H, H-18);  $^{13}\text{C-NMR}$  ( $\text{CDCl}_3$ )  $\delta$  154.3 (C=O of alloc), 154.2 (C=O of alloc), 153.9 (C=O of alloc), 140.2 (C-5), 135.8 (*o*-Ph of TBDPS), 135.5 (*o*-Ph of TBDPS), 134.5 (=CH<sub>2</sub> of allyl), 133.6 (*ipso*-Ph of TBDPS), 133.2 (*ipso*-Ph of TBDPS), 131.4 (=CH<sub>2</sub> of alloc), 131.2 (=CH<sub>2</sub> of alloc), 129.6 (*p*-Ph of TBDPS), 127.6 (*m*-Ph of TBDPS), 127.5 (*m*-Ph of TBDPS), 122.1 (C-6), 119.1 (-CH= of alloc), 118.8 (-CH= of alloc), 118.6 (-CH= of alloc), 117.2 (-CH= of allyl), 117.0 (-CH= of allyl), 99.1 (C-1',  $J_{\text{CH}} = 165$  Hz,  $\beta$  anomer), 97.3 (C-1'',  $J_{\text{CH}} = 175$  Hz,  $\alpha$  anomer), 85.1 (C-2'), 78.2 (C-4'), 78.0 (C-3'), 75.7 (C-5'), 74.9 (C-4'', C-3), 74.4 (-CH<sub>2</sub>- of allyl), 73.7 (-CH<sub>2</sub>- of allyl), 73.2 (C-3''), 73.0 (C-2''), 68.9 (-CH<sub>2</sub>- of alloc), 68.8 (-CH<sub>2</sub>- of alloc), 68.6 (-CH<sub>2</sub>- of alloc), 66.1 (C-5''), 62.8 (C-6'), 56.7 (C-14), 56.0 (C-17), 50.2 (C-9), 45.8 (C-24), 42.3 (C-13), 39.7 (C-12), 38.3 (C-4), 37.3 (C-1), 36.7 (C-10), 36.1 (C-20), 33.9 (C-22), 31.9 (C-8), 31.9 (C-7), 29.8 (C-2), 29.1 (C-25), 28.2 (C-16), 26.7 (-CH<sub>3</sub> of TBDPS), 26.0 (C-23), 24.3 (C-15), 23.0 (C-28), 21.0 (C-11), 19.8 (C-26 or C-27), 19.3 (C-26 or C-27), 19.0 (C-21), 18.8 (C-19), 17.1 (C-6''), 12.0 (C-18), 11.8 (C-29); HRMS (ESI-QTOF) calcd. for  $\text{C}_{75}\text{H}_{108}\text{NaO}_{16}\text{Si}$   $[\text{M}+\text{Na}]^+$  1315.7299; found: 1315.7290.

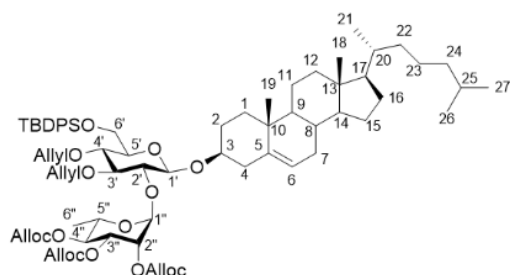

**Cholesteryl (2'',3'',4''-O-trialloc- $\alpha$ -L-rhamnopyranosyl)-  $\alpha$ (1 $\rightarrow$ 2)-3',4'-O-diallyl-6'-O-tert-butylidiphenylsilyl- $\beta$ -D-glucopyranoside (6c)**

After **compound 4c** (57.8 mg, 66.7  $\mu\text{mol}$ ) and **compound 5** (83.2 mg, 142  $\mu\text{mol}$ ) were co-evaporated with toluene four times, and dried over under reduced pressure, MS4A (68 mg) was added in  $\text{CH}_2\text{Cl}_2$

(930  $\mu\text{L}$ ). To the mixture was added TMSOTf (3.0  $\mu\text{L}$ , 17  $\mu\text{mol}$ ), and the mixture was stirred at 0  $^{\circ}\text{C}$  for 30 min and then at r.t. for an additional 30 min. Et<sub>3</sub>N (1 drop) was added and the reaction mixture was stirred for 30 min at r.t., filtered through a PTFE membrane filter (0.5  $\mu\text{m}$ , Advantec) and concentrated. The residue was purified by silica gel column chromatography (*n*-hexane/EtOAc=20/1-10/1) to give a mixture, and the obtained mixture was further purified by silica gel column chromatography (*n*-hexane/Et<sub>2</sub>O=8/1–Et<sub>2</sub>O) to afford **compound 6c** (51.9 mg, 62%) as a colorless oil;  $[\alpha]_{\text{D}}^{25}$  -2.45 (*c* 1.01, CHCl<sub>3</sub>); <sup>1</sup>H-NMR (CDCl<sub>3</sub>)  $\delta$  7.71–7.68 (m, 4H, Ar-H of TBDPS), 7.43–7.33 (m, 6H, Ar-H of TBDPS), 5.97–5.78 (m, 5H, -CH= of alloc, -CH= of allyl), 5.39–5.34 (m, 3H, H-6, =CH<sub>2</sub> of alloc), 5.33–5.23 (m, 7H, =CH<sub>2</sub> of allyl, =CH<sub>2</sub> of alloc, H-1'', H-2''), 5.20–5.15 (m, 1H, =CH<sub>2</sub> of allyl), 5.13–5.09 (m, 3H, =CH<sub>2</sub> of allyl, H-3''), 4.94 (dd, *J* = 10.0, 10.0 Hz, 1H, H-4''), 4.63–4.61 (m, 6H, -CH<sub>2</sub>- of alloc), 4.55–4.50 (m, 1H, H-5''), 4.42 (d, *J* = 7.6 Hz, 1H, H-1'  $\beta$ -anomer), 4.31 (dd, *J* = 12.2, 5.8 Hz, 1H, -CH<sub>2</sub>- of allyl), 4.25–4.21 (m, 2H, -CH<sub>2</sub>- of allyl), 4.10 (dd, *J* = 12.0, 5.6 Hz, 1H, -CH<sub>2</sub>- of allyl), 3.87–3.79 (m, 2H, H-6'), 3.63–3.57 (m, 1H, H-3), 3.56–3.52 (m, 1H, H-4'), 3.49–3.41 (m, 2H, H-2', H-3'), 3.28–3.25 (m, 1H, H-5'), 2.43–2.40 (m, 1H, H-4), 2.29–2.22 (m, 1H, H-4), 2.03–1.97 (m, 3H, -CH<sub>2</sub>- of cholesterol), 1.85–1.78 (m, 2H, -CH<sub>2</sub>- of cholesterol), 1.64–0.98 (m, 35H, H-6'', -CH<sub>3</sub> of TBDPS, -CH and -CH<sub>2</sub>- of cholesterol), 0.93–0.85 (m, 10H, -CH and -CH<sub>3</sub> of cholesterol), 0.68 (s, 3H, H-18); <sup>13</sup>C-NMR (CDCl<sub>3</sub>)  $\delta$  154.3 (C=O of alloc), 154.2 (C=O of alloc), 153.9 (C=O of alloc), 140.2 (C-5), 135.8 (*o*-Ph of TBDPS), 135.5 (*o*-Ph of TBDPS), 134.5 (=CH<sub>2</sub> of allyl), 133.2 (*ipso*-Ph of TBDPS), 131.4 (=CH<sub>2</sub> of alloc), 131.2 (=CH<sub>2</sub> of alloc), 129.6 (*p*-Ph of TBDPS), 127.6 (*m*-Ph of TBDPS), 127.5 (*m*-Ph of TBDPS), 122.1 (C-6), 119.1 (-CH= of alloc), 118.8 (-CH= of alloc), 118.6 (-CH= of alloc), 117.2 (-CH= of allyl), 117.1 (-CH= of allyl), 99.1 (C-1', *J*<sub>CH</sub> = 178 Hz,  $\beta$  anomer), 97.3 (C-1'', *J*<sub>CH</sub> = 163 Hz,  $\alpha$  anomer), 85.1 (C-2'), 78.2 (C-4'), 78.0 (C-3'), 75.7 (C-5'), 74.9 (C-4'', C-3), 74.4 (-CH<sub>2</sub>- of allyl), 73.7 (-CH<sub>2</sub>- of allyl), 73.2 (C-3''), 73.0 (C-2''), 68.9 (-CH<sub>2</sub>- of alloc), 68.8 (-CH<sub>2</sub>- of alloc), 68.6 (-CH<sub>2</sub>- of alloc), 66.1 (C-5''), 62.8 (C-6'), 56.7 (C-14), 56.1 (C-17), 50.2 (C-9), 42.3 (C-13), 39.7 (C-12), 39.5 (C-24), 38.3 (C-4), 37.3 (C-1), 36.7 (C-10), 36.2 (C-22), 35.8 (C-20), 31.9 (C-8), 31.8 (C-7), 29.8 (C-2), 28.2 (C-16), 28.0 (C-25), 26.7 (-CH<sub>3</sub> of TBDPS), 24.3 (C-15), 23.8 (C-23), 22.8 (C26 or C27), 22.6 (C26 or C27), 21.0 (C-11), 19.3 (C-21), 18.7 (C-19), 17.1 (C-6''), 11.8 (C-18); HRMS (ESI-QTOF) calcd. for C<sub>73</sub>H<sub>104</sub>NaO<sub>16</sub>Si [M+Na]<sup>+</sup> 1287.6986; found: 1287.6978.

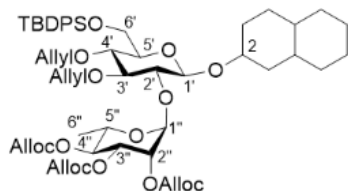

**Decahydro-2-naphthol (2'',3'',4''-O-trialloc- $\alpha$ -L-rhamnopyranosyl)-  $\alpha$ (1 $\rightarrow$ 2)-3',4'-O-diallyl-6'-O-tert-butylidiphenylsilyl- $\beta$ -D-glucopyranoside (**6d**)**

After **compound 4d** (isomeric mixture, 73.1 mg, 115  $\mu$ mol) and **compound 5** (131 mg, 223  $\mu$ mol) were co-evaporated with toluene four times, and dried over under reduced pressure, MS4A (91.8 mg) was added in  $\text{CH}_2\text{Cl}_2$  (1.6 mL). To the mixture was added TMSOTf (5.2  $\mu$ L, 29  $\mu$ mol), and the mixture was stirred at 0  $^\circ\text{C}$  for 30 min and then at r.t. for an additional 30 min. Et<sub>3</sub>N (1 drop) was added and the reaction mixture was stirred for 30 min at r.t., filtered through a PTFE membrane filter (0.5  $\mu$ m, Advantec) and concentrated. The residue was purified by silica gel column chromatography (n-hexane/EtOAc=3%-28%) to give a mixture, and the obtained mixture was further purified by silica gel column chromatography (n-hexane/Et<sub>2</sub>O=10/1–2/1) to afford **compound 6d** (90.0 mg, 76%) as colorless oil;  $[\alpha]_{\text{D}}^{25}$  -7.01 (*c* 1.07,  $\text{CHCl}_3$ );  $^1\text{H-NMR}$  ( $\text{CDCl}_3$ )  $\delta$  7.71–7.68 (m, 4H, Ar-H of TBDPS), 7.44–7.36 (m, 6H, Ar-H of TBDPS), 5.97–5.76 (m, 5H, -CH= of alloc, -CH= of allyl), 5.39–5.23 (m, 9H, =CH<sub>2</sub> of alloc, =CH<sub>2</sub> of allyl, H-1''), 5.18–5.08 (m, 4H, =CH<sub>2</sub> of allyl, H-2'', H-3''), 4.97–4.91 (m, 1H, H-4''), 4.65–4.57 (m, 6H, -CH<sub>2</sub>- of alloc), 4.51–4.37 (m, 2H, H-5'', H-1'), 4.30 (dd, *J* = 12.4, 5.6 Hz, 1H, -CH<sub>2</sub>- of allyl), 4.37–4.20 (m, 2H, -CH<sub>2</sub>- of allyl), 4.09–4.03 (m, 1H, -CH<sub>2</sub>- of allyl), 3.88–3.78 (m, 2H, H-6'), 3.57–3.37 (m, 3H, H-2, H-3', H-4'), 3.27 (d, *J* = 9.5 Hz, 1H, H-5'), 2.00–1.83 (m, 3H, decahydro-2-naphthol), 1.70–1.20 (m, 15H, H-6'', decahydro-2-naphthol), 1.09–0.87 (m, 11H, -CH<sub>3</sub> of TBDPS, decahydro-2-naphthol);  $^{13}\text{C-NMR}$  ( $\text{CDCl}_3$ )  $\delta$  154.5–154 (C=O of alloc), 135.7–135.5 (*o*-Ph of TBDPS), 134.6–134.5 (=CH<sub>2</sub> of allyl), 133.5–133.2 (*ipso*-Ph of TBDPS), 131.4–131.2 (=CH<sub>2</sub> of alloc), 129.6 (*p*-Ph of TBDPS), 127.6–127.5 (*m*-Ph of TBDPS), 119.1–118.5 (-CH= of alloc), 117.1 (-CH= of allyl), 99.7–98.5 (C-1'), 97.4–97.2 (C-1''), 85.2–85.1 (C-2'), 78.6 (C-4'), 78.1–77.7 (C-3'), 75.9–75.8 (C-5'), 75.0 (C-4''), 74.7 (C-2), 74.4–73.5 (-CH<sub>2</sub>- of allyl), 73.2 (C-3''), 73.1 (C-2''), 68.9–68.6 (-CH<sub>2</sub>- of alloc), 66.0 (C-5''), 62.9–62.8 (C-6'), 42.4, 41.4, 41.3, 41.0, 39.2, 35.3, 35.2, 35.1, 34.8, 34.5, 34.1, 33.8, 33.6, 33.2, 32.1, 31.8, 31.7, 31.5, 30.4, 29.7, 28.6, 26.7, 26.5, 26.3, 25.5, 25.1, 24.7, 22.6, 20.9, 20.6, 19.3 (decahydro-2-naphthol), 17.0 (C-6''), 14.1; HRMS (ESI-QTOF) calcd. for  $\text{C}_{56}\text{H}_{76}\text{NaO}_{16}\text{Si}$   $[\text{M}+\text{Na}]^+$  1055.4795; found: 1055.4792.

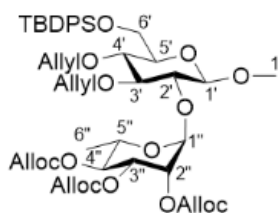

**Methyl (2'',3'',4''-O-trialloc- $\alpha$ -L-rhamnopyranosyl)- $\alpha$ (1→2)-3',4'-O-diallyl-6'-O-tert-butylidiphenylsilyl- $\beta$ -D-glucopyranoside (6e)**

After **compound 4e** (73.0 mg, 14.2  $\mu$ mol) and **compound 5** (193 mg, 329  $\mu$ mol) were co-evaporated with toluene four times, and dried over under reduced pressure, MS4A (97.8 mg) was added in  $\text{CH}_2\text{Cl}_2$  (2.0 mL). To the mixture was added TMSOTf (6.4  $\mu$ L, 36  $\mu$ mol), and the mixture was stirred at 0  $^\circ\text{C}$  for 30 min and then at r.t. for an additional 30 min. Et<sub>3</sub>N (1 drop) was added and the reaction mixture was stirred for 30 min at r.t., filtered through a PTFE membrane filter (0.5  $\mu$ m, Advantec) and concentrated. The residue was purified by silica gel column chromatography (*n*-hexane/EtOAc=8%-66%) to give a mixture, and the obtained mixture was further purified by silica gel column chromatography (*n*-hexane/EtOAc = 20/1–13/1) to afford **compound 6e** (67.20 mg, 52%) as a white solid;  $[\alpha]_{\text{D}}^{25}$  -3.01 (*c* 1.06,  $\text{CHCl}_3$ );  $^1\text{H-NMR}$  ( $\text{CDCl}_3$ )  $\delta$  7.75–7.69 (m, 4H, Ar-H of TBDPS), 7.45–7.34 (m, 6H, Ar-H of TBDPS), 6.00–5.82 (m, 5H, -CH= of alloc, -CH= of allyl), 5.39–5.32 (m, 3H, =CH<sub>2</sub> of alloc), 5.29–5.18 (m, 7H, =CH<sub>2</sub> of allyl, =CH<sub>2</sub> of alloc, H-1'', H-2''), 5.16–5.12 (m, 3H, =CH<sub>2</sub> of allyl, H-3''), 4.95 (dd, *J* = 9.8 Hz, 1H, H-4''), 4.66–4.61 (m, 6H, -CH<sub>2</sub>- of alloc), 4.34–4.15 (m, 6H, H-5'', H-1', -CH<sub>2</sub>- of allyl), 3.88 (d, *J* = 2.8 Hz, 2H, H-6'), 3.55–3.43 (m, 6H, H-1, H-2', H-3', H-4'), 3.25–3.23 (m, 1H, H-5'), 1.27 (d, *J* = 6.4 Hz, 3H, H-6''), 1.04 (s, 9H, -CH<sub>3</sub> of TBDPS);  $^{13}\text{C-NMR}$  ( $\text{CDCl}_3$ )  $\delta$  154.2 (C=O of alloc), 153.9 (C=O of alloc), 135.8 (C=O of alloc), 135.5 (*o*-Ph of TBDPS), 134.6 (=CH<sub>2</sub> of allyl), 133.1 (*ipso*-Ph of TBDPS), 131.3 (=CH<sub>2</sub> of alloc), 131.3 (=CH<sub>2</sub> of alloc), 131.2 (=CH<sub>2</sub> of alloc), 129.6 (*p*-Ph of TBDPS), 127.7 (*m*-Ph of TBDPS), 127.5 (*m*-Ph of TBDPS), 119.1 (-CH= of alloc), 119.0 (-CH= of alloc), 118.8 (-CH= of alloc), 117.3 (-CH= of allyl), 117.0 (-CH= of allyl), 102.1 (C-1', *J*<sub>CH</sub> = 159 Hz,  $\beta$  anomer), 98.0 (C-1'', *J*<sub>CH</sub> = 181 Hz,  $\alpha$  anomer), 84.6 (C-2'), 78.7 (C-4'), 77.6 (C-3'), 75.6 (C-5'), 74.9 (C-4''), 74.6 (-CH<sub>2</sub>- of allyl), 73.7 (-CH<sub>2</sub>- of allyl), 73.2 (C-3'', C-2''), 68.9 (-CH<sub>2</sub>- of alloc), 68.8 (-CH<sub>2</sub>- of alloc), 66.3 (C-5''), 62.4 (C-6'), 56.4 (C-1), 26.7 (-CH<sub>3</sub> of TBDPS), 19.3, 16.8 (C-6''); HRMS (ESI-QTOF) calcd. for C<sub>47</sub>H<sub>62</sub>NaO<sub>16</sub>Si [M+Na]<sup>+</sup> 933.3699; found: 933.3702.

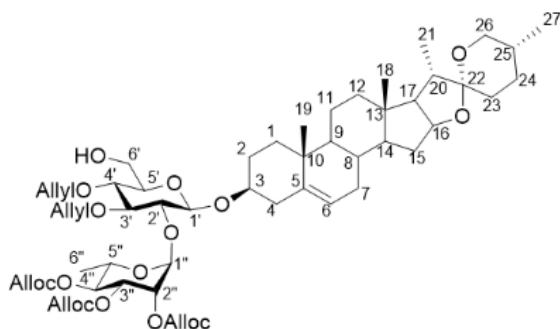

**Diosgenyl (2'',3'',4''-O-trialloc- $\alpha$ -L-rhamnopyranosyl)-  $\alpha$ (1 $\rightarrow$ 2)-3',4'-O-diallyl- $\beta$ -D-glucopyranoside (7a)**

To a stirred solution of **compound 6a** (26.0 mg, 20.0  $\mu$ mol) in THF (400  $\mu$ L) was added 1 M TBAF in THF (90  $\mu$ L, 90  $\mu$ mol), and the mixture was stirred at r.t. for 1.25 h. Then 1 M TBAF in THF (40  $\mu$ L, 40  $\mu$ mol) was added to the mixture, which was stirred at r.t. for additional 4.25 h. Sat. aq.  $\text{NH}_4\text{Cl}$  (ca. 1 mL) was added to the reaction mixture, and the aqueous layer was extracted with EtOAc. The combined organic extracts were washed with  $\text{H}_2\text{O}$  and brine, dried over  $\text{Na}_2\text{SO}_4$ , filtered through a cotton plug, and concentrated. The residue was purified by silica gel column chromatography (*n*-hexane/EtOAc=5/1) to afford **compound 7a** (13.7 mg, 65%) as a colorless solid;  $[\alpha]_{\text{D}}^{25}$  -42.6 (*c* 1.02,  $\text{CHCl}_3$ );  $^1\text{H-NMR}$  ( $\text{CDCl}_3$ )  $\delta$  5.97–5.84 (m, 5H, -CH= of allyl, -CH= of alloc), 5.41–5.40 (m, 1H, H-5), 5.39–5.34 (m, 2H, -CH= of alloc), 5.32–5.23 (m, 8H, =CH<sub>2</sub> allyl, =CH<sub>2</sub> of alloc, H-1'', H-2''), 5.19–5.07 (m, 3H, =CH<sub>2</sub> of allyl, H-3''), 4.93 (dd, *J* = 10.2 Hz, 1H, H-4''), 4.66–4.57 (m, 6H, -CH<sub>2</sub>- of alloc), 4.53–4.46 (m, 2H, H-5'', H-1'), 4.44–4.38 (m, 1H, H-16), 4.33–4.29 (dd, 12.2, 5.4 Hz, 1H, -CH<sub>2</sub>- of allyl), 4.27–4.20 (m, 2 H, -CH<sub>2</sub>- of allyl), 4.15–4.09 (m, 1H, -CH<sub>2</sub>- of allyl), 3.88–3.83 (m, 1H, H-6'), 3.73–3.66 (m, 1H, H-6'), 3.60–3.47 (m, 4H, H-2', H-3', H-3, H-26), 3.40–3.27 (m, 3H, H-4', H-5', H-26), 2.45–2.41 (m, 1H, H-4), 2.29–2.24 (m, 1H, H-4), 2.02–1.93 (m, 2H, H-15), 1.90–1.80 (m, 3H, H-1, H-8, H-20), 1.77–1.69 (m, 2H, H-12, H-17), 1.66–1.38 (m, 9H, H-2, H-11, H-23, H-24, H-25), 1.30–1.21 (m, 5H, H-6'', H-7), 1.19–1.09 (m, 3H, H-1, H-12, H-14), 0.979 (s, 3H, H-19), 0.95–0.84 (m, 4H, H-9, H-21), 0.80–0.78 (m, 6H, H-18, H-27);  $^{13}\text{C-NMR}$  ( $\text{CDCl}_3$ )  $\delta$  154.3 (C=O of alloc), 154.2 (C=O of of alloc), 153.8 (C=O of alloc), 139.9 (C-5), 134.4(=CH<sub>2</sub> of allyl), 134.3 (=CH<sub>2</sub> of allyl), 131.3 (=CH<sub>2</sub> of alloc), 131.1 (=CH<sub>2</sub> of alloc), 122.1 (C-6), 119.1 (-CH= of alloc), 118.8 (-CH= of alloc), 118.6 (-CH= of alloc), 117.5 (-CH= of allyl), 117.2 (-CH= of allyl), 109.2 (C-22), 99.1 (C-1'), 97.2 (C-1''), 84.7 (C-2'), 80.8 (C-16), 78.6 (C-4'), 77.7 (C-3') 76.2 (C-5'), 75.0 (C-4''), 74.8 (C-3), 74.3 (-CH<sub>2</sub>- of allyl), 73.7 (-CH<sub>2</sub>- of allyl), 73.1 (C-3''), 72.8 (C-2''), 68.9 (-CH<sub>2</sub>- of alloc), 68.8 (-CH<sub>2</sub>- of alloc), 68.6 (-CH<sub>2</sub>- of alloc), 66.8 (C-26), 66.1 (C-5''), 62.0 (C-6'), 61.8 (C-17), 56.4 (C-14), 50.0 (C-9), 41.6 (C-4), 40.2 (C-20), 39.7 (C-13), 38.2 (C-12), 37.1 (C-1), 36.8 (C-10), 32.0 (C-7), 31.8 (C-15), 31.3 (C-2), 30.2 (C-8, C-23), 29.6 (C-25), 28.7 (C-24), 20.8 (C-11), 19.2 (C-19), 17.1 (C-6''), 17.0

(C-27), 16.2 (C-18), 14.5 (C-21); HRMS (ESI-QTOF) calcd. for C<sub>57</sub>H<sub>82</sub>NaO<sub>18</sub> [M+Na]<sup>+</sup> 1077.5393; found: 1077.5393.

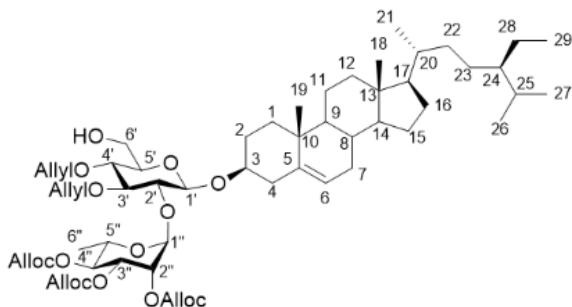

**$\beta$ -sitosteryl (2'',3'',4''-*O*-trialloc- $\alpha$ -L-rhamnopyranosyl)- $\alpha$ (1 $\rightarrow$ 2)-3',4'-*O*-diallyl- $\beta$ -D-glucopyranoside (7b)**

To a stirred solution of **compound 6b** (42.8 mg, 33.1  $\mu$ mol) in THF (600  $\mu$ L) was added 1 M TBAF in THF (150  $\mu$ L, 150  $\mu$ mol), and the mixture was stirred at r.t. for 2.5 h. Then 1 M TBAF in THF (75  $\mu$ L, 75  $\mu$ mol) was added to the mixture, which was stirred at r.t. for additional 2 h. Sat. aq. NH<sub>4</sub>Cl (ca. 1 mL) was added to the reaction mixture, and the aqueous layer was extracted with EtOAc. The combined organic extracts were washed with H<sub>2</sub>O and brine, dried over Na<sub>2</sub>SO<sub>4</sub>, filtered through a cotton plug, and concentrated. The residue was purified by silica gel column chromatography (*n*-hexane/EtOAc=8%-25%) to afford **compound 7b** (27.9 mg, 80%) as a colorless solid; [ $\alpha$ ]<sub>D</sub><sup>25</sup> -7.91 (*c* 1.03, CHCl<sub>3</sub>); <sup>1</sup>H-NMR (CDCl<sub>3</sub>)  $\delta$  5.97–5.85 (m, 5H, -CH= of allyl, -CH= of alloc), 5.41–5.40 (m, 1H, H-6), 5.39–5.34 (m, 2H, =CH<sub>2</sub> of alloc), 5.32–5.30 (m, 2H, =CH<sub>2</sub> of allyl or alloc, H-1''), 5.29–5.23 (m, 6H, =CH<sub>2</sub> of allyl, =CH<sub>2</sub> of alloc, H-2''), 5.19–5.16 (m, 1H, =CH<sub>2</sub> of allyl), 5.14–5.07 (m, 2H, =CH<sub>2</sub> of allyl, H-3''), 4.93 (dd, *J* = 10.4 Hz, 1H, H-4''), 4.66–4.58 (m, 6H, -CH<sub>2</sub>- of alloc), 4.54–4.47 (m, 2H, H-5'', H-1'), 4.31 (dd, *J* = 12.4, 5.8 Hz, 1H, -CH<sub>2</sub>- of allyl), 4.27–4.20 (m, 2 H, -CH<sub>2</sub>- of allyl), 4.15–4.10 (m, 1H, -CH<sub>2</sub>- of allyl), 3.87–3.83 (m, 1H, H-6'), 3.73–3.67 (m, 1H, H-6'), 3.62–3.47 (m, 3H, H-2', H-3', H-3), 3.37–3.27 (m, 2H, H-4', H-5'), 2.44–2.40 (m, 1H, H-4), 2.29–2.24 (m, 1H, H-4), 2.05–1.80 (m, 6H, -CH<sub>2</sub>- of  $\beta$ -sitosterol), 1.71–0.99 (m, 23H, H-6'', -CH<sub>2</sub>- and -CH of  $\beta$ -sitosterol), 0.95–0.81 (m, 16H, -CH and -CH<sub>3</sub> of  $\beta$ -sitosterol) 0.68 (s, 3H, H-18); <sup>13</sup>C-NMR (CDCl<sub>3</sub>)  $\delta$  154.3 (C=O of alloc), 154.2 (C=O of alloc), 153.9 (C=O of alloc), 139.9 (C-5), 134.5(=CH<sub>2</sub> of allyl), 134.4(=CH<sub>2</sub> of allyl), 131.4 (=CH<sub>2</sub> of alloc), 131.2 (=CH<sub>2</sub> of alloc), 122.4 (C-6), 119.2 (-CH= of alloc), 118.8 (-CH= of alloc), 118.6 (-CH= of alloc), 117.5 (-CH= of allyl), 117.2 (-CH= of allyl), 99.1 (C-1'), 97.2 (C-1''), 84.7 (C-2'), 78.8 (C-4'), 77.7 (C-3'), 76.3 (C-5'), 75.0 (C-4''), 74.9 (C-3), 74.4 (-CH<sub>2</sub>- of allyl), 73.7 (-CH<sub>2</sub>- of allyl), 73.1 (C-3''), 72.9 (C-2''), 68.9 (-CH<sub>2</sub>- of alloc), 68.8 (-CH<sub>2</sub>- of alloc), 68.6 (-CH<sub>2</sub>- of alloc), 66.1 (C-5''), 61.9 (C-6'), 56.7 (C-14), 56.0 (C-17), 50.1 (C-9), 45.8 (C-24), 42.3 (C-13), 39.7 (C-12), 38.3 (C-4), 37.2 (C-1), 36.7 (C-10), 36.1 (C-20), 33.9 (C-22), 31.9 (C-

8), 31.8 (C-7), 29.7 (C-2), 29.1 (C-25), 28.2 (C-16), 26.0 (C-23), 24.3 (C-15), 23.0 (C-28), 21.0 (C-11), 19.8 (C-26 or C-27), 19.2 (C-26 or C27), 19.0 (C-21), 18.8 (C-19), 17.0 (C-6''), 12.0 (C-18), 11.8 (C-29); HRMS (ESI-QTOF) calcd. for C<sub>59</sub>H<sub>90</sub>NaO<sub>16</sub> [M+Na]<sup>+</sup> 1077.6121; found: 1077.6118.

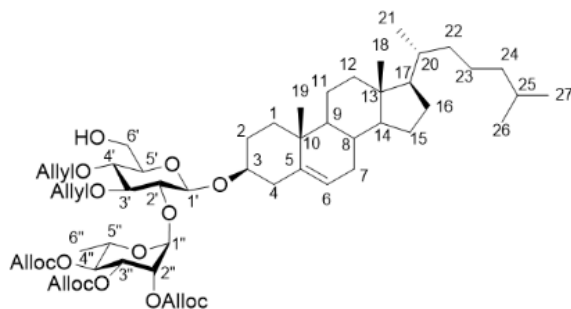

**Cholesteryl (2'',3'',4''-O-trialloc- $\alpha$ -L-rhamnopyranosyl)- $\alpha$ (1 $\rightarrow$ 2)-3',4'-O-diallyl- $\beta$ -D-glucopyranoside (7c)**

To a stirred solution of **compound 6c** (49.2 mg, 38.9  $\mu$ mol) in THF (800  $\mu$ L) was added 1 M TBAF in THF (175  $\mu$ L, 175  $\mu$ mol), and the mixture was stirred at r.t. for 2.5 h. Then 1 M TBAF in THF (90  $\mu$ L, 90  $\mu$ mol) was added to the mixture, which was stirred at r.t. for 2 h. Sat. aq. NH<sub>4</sub>Cl (ca. 1 mL) was added to the reaction mixture, and the aqueous layer was extracted with EtOAc. The combined organic extracts were washed with H<sub>2</sub>O and brine, dried over Na<sub>2</sub>SO<sub>4</sub>, filtered through a cotton plug, and concentrated. The residue was purified by silica gel column chromatography (*n*-hexane/EtOAc=8%-25%) to afford **compound 7c** (30.0 mg, 75%) as a colorless solid;  $[\alpha]_D^{25}$  -7.44 (*c* 0.93, CHCl<sub>3</sub>); <sup>1</sup>H-NMR (CDCl<sub>3</sub>)  $\delta$  5.97–5.85 (m, 5H, -CH= of allyl, -CH= of alloc), 5.39–5.34 (m, 3H, =CH<sub>2</sub> of alloc, H-6), 5.32–5.30 (m, 2H, =CH<sub>2</sub> of allyl or alloc, H-1') 5.29–5.22 (m, 6H, =CH<sub>2</sub> of allyl, =CH<sub>2</sub> of alloc, H-2''), 5.19–5.16 (m, 1H, =CH<sub>2</sub> of allyl), 5.14–5.07 (m, 2H, =CH<sub>2</sub> of allyl, H-3''), 4.93 (dd, *J* = 10.4, 10.4 Hz, 1H, H-4''), 4.66–4.58 (m, 6H, -CH<sub>2</sub>- of alloc), 4.53–4.47 (m, 2H, H-5'', H-1'), 4.30 (dd, *J* = 12.2, 5.4 Hz, 1H, -CH<sub>2</sub>- of allyl), 4.27–4.20 (m, 2H, -CH<sub>2</sub>- of allyl), 4.12 (dd, *J* = 12.2, 5.8 Hz, 1H, -CH<sub>2</sub>- of allyl), 3.88–3.83 (m, 1H, H-6'), 3.73–3.66 (m, 1H, H-6'), 3.62–3.47 (m, 3H, H-2', H-3', H-3), 3.37–3.27 (m, 2H, H-4', H-5'), 2.44–2.40 (m, 1H, H-4), 2.29–2.24 (m, 1H, H-4), 2.02–1.78 (m, 6H, -CH<sub>2</sub>- of cholesterol), 1.71–0.83 (m, 25H, H-6'', -CH<sub>2</sub>- and -CH and -CH<sub>3</sub> of cholesterol), 0.95–0.85 (m, 10H, -CH and -CH<sub>3</sub> of cholesterol) 0.67 (s, 3H, H-18); <sup>13</sup>C-NMR (CDCl<sub>3</sub>)  $\delta$  154.3 (C=O of alloc), 154.2 (C=O of alloc), 153.9 (C=O of alloc), 139.9 (C-5), 134.4 (=CH<sub>2</sub> of allyl), 134.3 (=CH<sub>2</sub> of allyl), 131.4 (=CH<sub>2</sub> of alloc), 131.2 (=CH<sub>2</sub> of alloc), 122.4 (C-6), 119.2 (-CH= of alloc), 118.8 (-CH= of alloc), 118.6 (-CH= of alloc), 117.5 (-CH= of allyl), 117.2 (-CH= of allyl), 99.1 (C-1'), 97.2 (C-1''), 84.7 (C-2'), 78.8 (C-4'), 77.7 (C-3'), 76.3 (C-5'), 75.0 (C-4''), 74.9 (C-3), 74.4 (-CH<sub>2</sub>- of allyl), 73.7 (-CH<sub>2</sub>- of allyl), 73.1 (C-3''), 72.9 (C-2''), 68.9 (-CH<sub>2</sub>- of alloc), 68.8 (-CH<sub>2</sub>- of alloc), 68.6 (-CH<sub>2</sub>- of alloc), 66.1 (C-5''), 61.8 (C-6'), 56.7 (C-14), 56.1 (C-17), 50.1 (C-9), 42.3 (C-

13), 39.7 (C-12), 39.5 (C-24), 38.3 (C-4), 37.2 (C-1), 36.7 (C-10), 36.2 (C-22), 35.8 (C-20), 31.9 (C-8), 31.8 (C-7), 29.7 (C-2), 28.2 (C-16), 28.0 (C-25), 24.3 (C-15), 23.8 (C-23), 22.8 (C26 or C27), 22.5 (C26 or C27), 21.0 (C-11), 19.2 (C-21), 18.7 (C-19), 17.0 (C-6''), 11.8 (C-18); HRMS (ESI-QTOF) calcd. for C<sub>57</sub>H<sub>86</sub>NaO<sub>16</sub> [M+Na]<sup>+</sup> 1049.5808; found: 1049.5817.

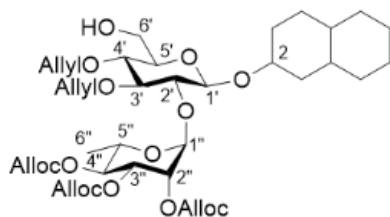

**Decahydro-2-naphthol (2'',3'',4''-O-trialloc- $\alpha$ -L-rhamnopyranosyl)-  $\alpha$ (1 $\rightarrow$ 2)-3',4'-O-diallyl- $\beta$ -D-glucopyranoside (7d)**

To a stirred solution of **compound 6d** (90.0 mg, 87.1  $\mu$ mol) in THF (1.7 mL) was added 1 M TBAF in THF (390  $\mu$ L, 390  $\mu$ mol), and the mixture was stirred at r.t. for 2.5 h. Then 1 M TBAF in THF (190  $\mu$ L, 190  $\mu$ mol) was added to the mixture, which was stirred at r.t. for 2 h. Sat. aq. NH<sub>4</sub>Cl (ca. 1 mL) was added to the reaction mixture, and the aqueous layer was extracted with EtOAc. The combined organic extracts were washed with H<sub>2</sub>O and brine, dried over Na<sub>2</sub>SO<sub>4</sub>, filtered through a cotton plug, and concentrated. The residue was purified by silica gel column chromatography (*n*-hexane/EtOAc=5%-27%) to afford **compound 7d** (53.1 mg, 77%) as a colorless solid; <sup>1</sup>H-NMR (CDCl<sub>3</sub>)  $\delta$  5.97–5.85 (m, 5H, -CH= of allyl, -CH= of alloc), 5.39–5.32 (m, 4H, =CH<sub>2</sub> of alloc), 5.29–5.22 (m, 6H, =CH<sub>2</sub> of alloc, =CH<sub>2</sub> of allyl, H-1'', H-2''), 5.19–5.16 (m, 1H, =CH<sub>2</sub> of allyl) 5.15–5.08 (m, 2H, =CH<sub>2</sub> of allyl, H-3''), 4.97–4.89 (m, 1H, H-4''), 4.65–4.58 (m, 6H, -CH<sub>2</sub>- of alloc), 4.52–4.42 (m, 2H, H-5'', H-1'), 4.31 (dd, *J* = 12.4, 6.0 Hz, 1H, -CH<sub>2</sub>- of allyl), 4.27–4.19 (m, 2H, -CH<sub>2</sub>- of allyl), 4.15–4.09 (m, 1H, -CH<sub>2</sub>- of allyl), 3.88–3.84 (m, 2H, H-6', H-2), 3.73–3.61 (m, 1H, H-6'), 3.56–3.45 (m, 2H, H-2', H-3'), 3.37–3.28 (m, 2H, H-4', H-5'), 2.10–1.30 (m, 14H, decahydro-2-naphthol), 1.26–1.22 (m, 5H, H-6'', decahydro-2-naphthol), 1.11–0.83 (m, 1H, decahydro-2-naphthol); <sup>13</sup>C-NMR (CDCl<sub>3</sub>)  $\delta$  154.3–153.9 (C=O of alloc), 134.4–134.3 (=CH<sub>2</sub> of allyl), 131.3–131.1 (=CH<sub>2</sub> of alloc), 119.1–118.5 (-CH= of alloc), 117.5–117.1 (-CH= allyl), 99.9–99.1 (C-1'), 98.8–97.0 (C-1''), 84.8 (C-2'), 78.6 (C-4'), 78.1–77.8 (C-3'), 76.2–75.5 (C-5'), 75.0 (C-4''), 74.9 (C-3), 74.5–73.7 (-CH<sub>2</sub>- of allyl), 73.1 (C-3''), 73.0 (C-2''), 68.9–68.6 (-CH<sub>2</sub>- of alloc), 66.1 (C-5''), 61.9 (C-6'), 42.3, 41.2, 41.2, 41.0, 39.3, 35.2, 34.9, 34.6, 34.5, 33.9, 33.7, 33.5, 33.4, 33.1, 31.9, 31.7, 30.3, 28.5, 26.4, 26.2, 25.4,

24.9, 24.7 (decahydro-2-naphthol), 17.0 (C-6''); HRMS (ESI-QTOF) calcd. for C<sub>40</sub>H<sub>58</sub>NaO<sub>16</sub> [M+Na]<sup>+</sup> 817.3617; found: 817.3614.

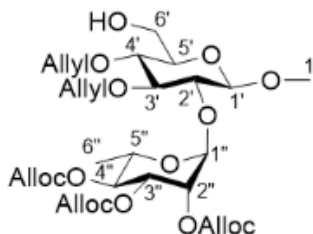

**Methyl (2'',3'',4''-O-trialloc-α-L-rhamnopyranosyl)-α(1→2)-3',4'-O-diallyl-β-D-glucopyranoside (7e)**

To a stirred solution of **compound 6e** (67.2 mg, 73.8 μmol) in THF (1.5 mL) was added 1 M TBAF in THF (330 μL, 330 μmol), and the mixture was stirred at r.t. for 2.5 h. Then 1 M TBAF in THF (160 μL, 160 μmol) was added to the mixture, which was stirred at r.t. for 2 h. Sat. aq. NH<sub>4</sub>Cl (ca. 1 mL) was added to the reaction mixture, and the aqueous layer was extracted with EtOAc. The combined organic extracts were washed with H<sub>2</sub>O and brine, dried over Na<sub>2</sub>SO<sub>4</sub>, filtered filtered through a cotton plug, and concentrated. The residue was purified by silica gel column chromatography (*n*-hexane/EtOAc=8%-35%) to afford **compound 7e** (32.7 mg, 66%) as a colorless solid; [α]<sub>D</sub><sup>25</sup> -3.75 (*c* 1.30, CHCl<sub>3</sub>); <sup>1</sup>H-NMR (CDCl<sub>3</sub>) δ 5.96–5.84 (m, 5H, -CH= of allyl, -CH= of alloc), 5.37–5.30 (m, 3H, =CH<sub>2</sub> of alloc), 5.27–5.21 (m, 7H, =CH<sub>2</sub> of alloc, =CH<sub>2</sub> of allyl, H-1'', H-2''), 5.18–5.15 (m, 1H, =CH<sub>2</sub> of allyl) 5.13–5.09 (m, 3H, =CH<sub>2</sub> of allyl, H-3''), 4.92 (dd, *J* = 10.0, 10.0 Hz, 1H, H-4''), 4.67–4.56 (m, 6H, -CH<sub>2</sub>- of alloc), 4.34–4.27 (m, 1H, -CH<sub>2</sub>- of allyl), 4.24–4.17 (m, 4H, -CH<sub>2</sub>- of allyl, H-5'', H-1'), 4.16–4.10 (m, 1H, -CH<sub>2</sub>- of allyl), 3.89–3.85 (m, 1H, H-6'), 3.74–3.65 (m, 1H, H-6'), 3.45 (s, 3H, H-1), 3.47–3.43 (m, 2H, H-2', H-3'), 3.38–3.34 (m, 1H, H-4'), 3.31–3.26 (m, 1H, H-5'), 1.24 (d, *J* = 6.4 Hz, 3H, H-6''); <sup>13</sup>C-NMR (CDCl<sub>3</sub>) δ 154.2 (C=O of alloc), 154.2 (C=O of alloc), 153.9 (C=O of alloc), 134.4 (=CH<sub>2</sub> of allyl), 134.3 (=CH<sub>2</sub> of allyl), 131.3 (=CH<sub>2</sub> of alloc), 131.2 (=CH<sub>2</sub> of alloc), 131.1 (=CH<sub>2</sub> of alloc), 119.2 (-CH= of alloc), 119.0 (-CH= of alloc), 118.8 (-CH= of alloc), 117.5 (-CH= of allyl), 117.3 (-CH= of allyl), 102.4 (C-1'), 97.9 (C-1''), 84.3 (C-2'), 78.0 (C-4'), 77.4 (C-3'), 75.0 (C-5'), 74.8 (C-4''), 74.5 (-CH<sub>2</sub>- of allyl), 73.7 (-CH<sub>2</sub>- of allyl), 73.1 (C-3'', C-2''), 68.9 (-CH<sub>2</sub>- of alloc), 68.8 (-CH<sub>2</sub>- of alloc), 66.4 (C-5''), 61.6 (C-6'), 57.1 (C-1), 16.8 (C-6''); HRMS (ESI-QTOF) calcd. for C<sub>31</sub>H<sub>44</sub>NaO<sub>16</sub> [M+Na]<sup>+</sup> 695.2522; found: 695.2514.

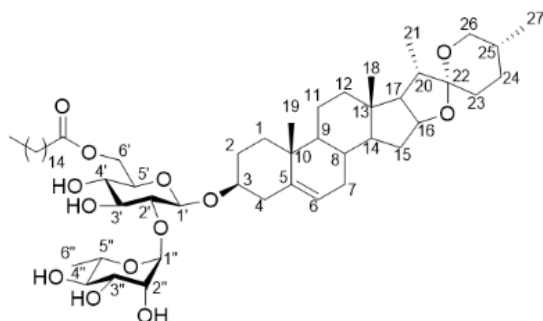

### Diosgenyl $\alpha$ -L-rhamnopyranosyl- $\alpha$ (1 $\rightarrow$ 2)-6'-O-palmitoyl- $\beta$ -D-glucopyranoside (**1a**)

To a stirred solution of **compound 7a** (13.7 mg, 12.9  $\mu$ mol) and palmitic acid (6.5 mg, 25.3  $\mu$ mol) in  $\text{CH}_2\text{Cl}_2$  (260  $\mu$ L) was added EDCI $\cdot$  HCl (5.08 mg, 26.5  $\mu$ mol), DMAP (2.0 mg, 16.3  $\mu$ mol) and the mixture was stirred at 0  $^\circ\text{C}$  to r.t. for 3.75 h. Then, EDCI $\cdot$  HCl (5.08 mg, 26.5  $\mu$ mol) was added to the mixture, which was stirred at r.t. for 1.5 h.  $\text{H}_2\text{O}$  (ca. 1 mL) was added to the reaction mixture, and the aqueous layer was extracted with EtOAc. The combined organic extracts was washed with 1M NaOH twice,  $\text{H}_2\text{O}$ , brine, dried over anhydrous  $\text{Na}_2\text{SO}_4$ , filtered through a cotton plug, and then concentrated. The residue was purified by silica gel column chromatography (*n*-hexane/EtOAc=10/1) to give a partially purified material, which was used in the next step. A portion of the obtained material (11.2 mg) was dissolved in  $\text{CHCl}_3/\text{MeOH}=5:1$  with TFA 1 % (290  $\mu$ L) and Ru cat. (950  $\mu$ g, 1.81  $\mu$ mol) was added. The reaction mixture was stirred at r.t. for 2.5 h. Additional Ru cat. (430  $\mu$ g, 0.82  $\mu$ mol) was added, and the reaction mixture was stirred at r.t. for an additional 2 h. Then, Ru cat. (930  $\mu$ g, 1.77  $\mu$ mol) was added, and the reaction mixture was stirred for an additional 17 h. SiliaMetS<sup>®</sup> (25 mg) was added and the reaction mixture was stirred for 30 min at r.t., filtered through a PTFE membrane filter (0.5  $\mu$ m, Advantec) and concentrated. The residue was purified by silica gel column chromatography (chloroform/methanol = 15/1–8/1) to give a mixture. The mixture was purified by silica gel column chromatography (chloroform/methanol = 15/1) with a pad of SiliaMetS<sup>®</sup> to afford **compound 1a** (6.63 mg, 43% over 2 steps) as a white solid;  $^1\text{H-NMR}$  ( $\text{CDCl}_3/\text{CD}_3\text{OD} = 12:1$ , 30  $^\circ\text{C}$ )  $\delta$  5.35 (d,  $J = 4.8$  Hz, 1H, H-6), 5.19 (s, 1H, H-1''), 4.44–4.23 (m, 4H, H-16, H-1', H-6'), 4.11–4.04 (m, 1H, H-5''), 3.94 (s, 1H, H-4'), 3.70 (dd,  $J = 9.6, 3.6$  Hz, 1H, H-3'), 3.55–3.34 (m, 7H, H-3, H-26, H-2', H-5', H-3'', H-4''), 3.31–3.26 (m, 1H, H-2''), 2.40–2.21 (m, 4H,  $\alpha$ -CH<sub>2</sub> of palmitic acid, H-4), 2.01–1.42 (m, 18H,  $\beta$ -CH<sub>2</sub> of palmitic acid, -CH<sub>2</sub>- and -CH- of diosgenin), 1.28–1.03 (m, 32H, H-6'', -CH<sub>2</sub>- of palmitic acid, H-1, H-7, H-12, H-14), 1.01 (s, 3H, H-19), 0.98–0.45 (m, 4H, H-9, H-21), 0.93–0.82 (t,  $J = 6.8$  Hz, 3H, -CH<sub>3</sub> of palmitic acid), 0.80–0.79 (m, 6H, H-18, H-27);  $^{13}\text{C-NMR}$  ( $\text{CDCl}_3/\text{CD}_3\text{OD} = 12:1$ , 30  $^\circ\text{C}$ )  $\delta$  174.4 (C=O of palmitic acid), 140.4 (C-5), 121.5 (C-6), 109.4 (C-22), 100.2 (C-1''), 99.9 (C-1'), 80.8 (C-16), 79.2 (C-2'), 77.5 (C-3), 73.4 (C-4''), 72.7 (C-3''), 71.2 (C-3'), 70.4 (C-4'), 70.3 (C-2''), 68.1 (C-5''), 66.7 (C-26), 63.6 (C-6'), 61.9 (C-17), 56.4 (C-14), 50.0 (C-9), 41.5 (C-4), 40.1 (C-20), 39.6 (C-13), 38.3 (C-12), 37.1 (C-1), 36.7 (C-10), 34.1 ( $\alpha$ -CH<sub>2</sub> of palmitic acid), 31.9 (C-7), 31.8 ( $\omega$ -

24)-CH<sub>2</sub> of palmitic acid), 31.6 (C-2 and C-15), 31.2 (C-8), 31.2 (C-23), 30.1 (C-25), 29.6 (-CH<sub>2</sub> of palmitic acid), 29.4 (C-24), 29.2 (-CH<sub>2</sub> of palmitic acid), 29.1 (-CH<sub>2</sub> of palmitic acid), 28.6 (C-24), 24.8 (β-CH<sub>2</sub> of palmitic acid), 22.6 ((ω-1)-CH<sub>2</sub> of palmitic acid), 20.7 (C-11), 19.1 (C-19), 17.2 (C-6''), 16.9 (C-27), 16.1 (C-18), 14.3 (C-21), 14.0 (-CH<sub>3</sub> of palmitic acid); HRMS (ESI-QTOF) calcd. for C<sub>55</sub>H<sub>92</sub>NaO<sub>13</sub> [M+Na]<sup>+</sup> 983.6430; found: 983.6431.

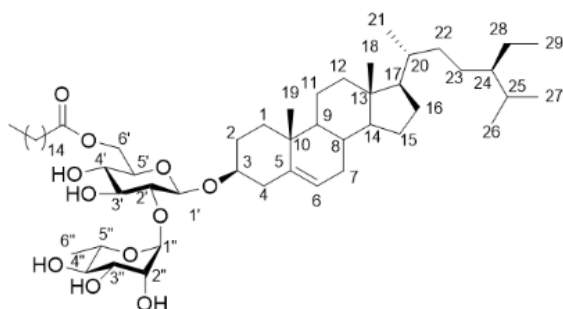

#### β-sitosteryl α-L-rhamnopyranosyl-α(1→2)-6'-O-palmitoyl-β-D-glucopyranoside (**1b**)

To a stirred solution of **compound 7b** (20.8 mg, 19.7 μmol) and palmitic acid (10.3 mg, 40.2 μmol) in CH<sub>2</sub>Cl<sub>2</sub> (400 μL) was added EDCI·HCl (8.38 mg, 43.7 μmol), DMAP (2.50 mg, 20.4 μmol) and the mixture was stirred at r.t. for 11 h. H<sub>2</sub>O (ca. 1 mL) was added to the reaction mixture, and the aqueous layer was extracted with EtOAc. The combined organic extracts was washed with 1M NaOH twice, H<sub>2</sub>O, brine, dried over anhydrous Na<sub>2</sub>SO<sub>4</sub>, filtered through a cotton plug, and then concentrated. The residue was purified by silica gel column chromatography (*n*-hexane/EtOAc=5%-40%) to give a partially purified material, which was used in the next step. A portion of the obtained material (15.8 mg) was dissolved in CHCl<sub>3</sub>/MeOH=5:1 with TFA 1 % (400 μL) and Ru cat. (1.60 mg, 3.04 μmol) was added. The reaction mixture was stirred at r.t. for 12 h. SiliaMetS<sup>®</sup> (57.3 mg) was added and the reaction mixture was stirred for 30 min at r.t., filtered through a PTFE membrane filter (0.5 μm, Advantec) and concentrated. The residue was purified by silica gel column chromatography (chloroform/methanol = 3%–28%) with a pad of SiliaMetS<sup>®</sup> three times to afford **compound 1b** (7.59 mg, 73% over two steps) as a white solid; <sup>1</sup>H-NMR (CDCl<sub>3</sub>/CD<sub>3</sub>OD = 12:1, 30 °C) δ 5.35 (d, *J* = 4.8 Hz, 1H, H-6), 5.19 (s, 1H, H-1''), 4.41 (d, *J* = 7.2 Hz, 1 H, H-1' β anomer), 4.35 (dd, *J* = 12.2, 2.2 Hz, 1 H, H-6'), 4.25 (dd, *J* = 12.0, 6.8 Hz, 1H, H-6'), 4.11–4.04 (m, 1H, H-5''), 3.95 (d, *J* = 1.6 Hz, 1H, H-4'), 3.70 (dd, *J* = 9.6, 3.6 Hz, 1H, H-3'), 3.56–3.38 (m, 6H, H-2', H-5', H-3'', H-4'', H-3), 3.30–3.26 (m, 1H, H-2''), 2.40–2.26 (m, 4H, α-CH<sub>2</sub> of palmitic acid, H-4), 2.03–1.80 (m, 6H, -CH<sub>2</sub>- of β-sitosterol), 1.71–1.00 (m, 49H, H-6'', -CH<sub>2</sub>- of palmitic acid, -CH<sub>2</sub>- and -CH of β-sitosterol), 0.97–0.81 (m, 21H, -CH<sub>3</sub> of palmitic acid, -CH<sub>3</sub> of β-sitosterol) 0.68 (s, 3H, H-18); <sup>13</sup>C-NMR (CDCl<sub>3</sub>/CD<sub>3</sub>OD = 12:1) δ 174.3 (C=O of acyl), 140.4 (C-5), 121.8 (C-6), 100.2 (C-1''), 99.8 (C-1'), 79.3 (C-2'), 77.5 (C-3), 73.4 (C-4''), 72.7 (C-3''), 71.2 (C-3'), 70.4 (C-4'), 70.3 (C-2''), 68.1 (C-5''),

63.6 (C-6'), 56.6 (C-14), 55.9 (C-17), 50.1 (C-9) 45.7 (C-24), 42.2 (C-13), 39.6 (C-12), 38.4 (C-4), 37.2 (C-1), 36.6 (C-10), 36.0 (C-20), 34.2 ( $\alpha$ -CH<sub>2</sub> of palmitic acid), 33.8 (C-22), 31.8 (( $\omega$ -2)-CH<sub>2</sub> of palmitic acid and C-8), 31.7 (C-7), 29.6 (-CH<sub>2</sub> of palmitic acid), 29.5 (-CH<sub>2</sub> of palmitic acid), 29.5 (C-2), 29.2 (-CH<sub>2</sub> of palmitic acid), 29.1 (C-25), 29.0 (-CH<sub>2</sub> of palmitic acid), 28.1 (C-16), 25.9 (C-23), 24.8 ( $\beta$ -CH<sub>2</sub> of palmitic acid), 24.1 (C-15), 22.9 (C-28), 22.6 (( $\omega$ -1)-CH<sub>2</sub> of palmitic acid), 20.9 (C-11), 19.7 (C-26 or C27), 19.1 (C-26 or C27), 18.8 (C-21), 18.6 (C-19), 17.2 (C-6''), 14.0 (-CH<sub>3</sub> of palmitic acid), 11.8 (C-18), 11.7 (C-29); HRMS (ESI-QTOF) calcd. for C<sub>57</sub>H<sub>100</sub>NaO<sub>11</sub> [M+Na]<sup>+</sup> 983.7158; found: 983.7158.

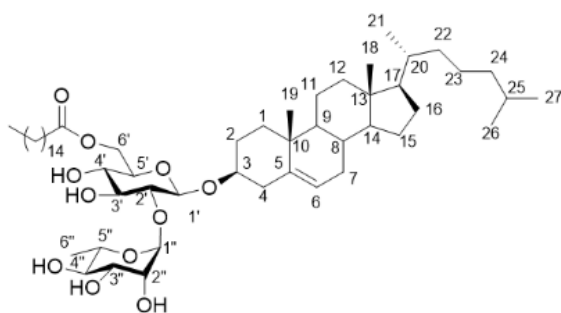

#### Cholesteryl $\alpha$ -L-rhamnopyranosyl- $\alpha$ (1 $\rightarrow$ 2)-6'-O-palmitoyl- $\beta$ -D-glucopyranoside (**1c**)

To a stirred solution of **compound 7c** (22.9 mg, 22.3  $\mu$ mol) and palmitic acid (11.4 mg, 44.5  $\mu$ mol) in CH<sub>2</sub>Cl<sub>2</sub> (580  $\mu$ L) was added EDCI·HCl (8.53 mg, 44.5  $\mu$ mol), DMAP (2.70 mg, 22.1  $\mu$ mol) and the mixture was stirred at r.t. for 11 h. H<sub>2</sub>O (ca. 1 mL) was added to the reaction mixture, and the aqueous layer was extracted with EtOAc. The combined organic extracts was washed with 1M NaOH twice, H<sub>2</sub>O, brine, dried over anhydrous Na<sub>2</sub>SO<sub>4</sub>, filtered through a cotton plug, and then concentrated. The residue was purified by silica gel column chromatography (*n*-hexane/EtOAc=5%-40%) to give a partially purified material, which was used in the next step. A portion of the obtained material (16.1 mg) was dissolved in CHCl<sub>3</sub>/MeOH=5:1 with TFA 1 % (425  $\mu$ L) and Ru cat. (1.67 mg, 3.18  $\mu$ mol) was added. The reaction mixture was stirred at r.t. for 12 h. SiliaMetS<sup>®</sup> (59 mg) was added and the reaction mixture was stirred for 30 min at r.t., filtered through a PTFE membrane filter (0.5  $\mu$ m, Advantec) and concentrated. The residue was purified by silica gel column chromatography (chloroform/methanol = 3%-26%) with a pad of SiliaMetS<sup>®</sup> to afford **compound 1c** (6.61 mg, 56% over two steps) as a white solid; <sup>1</sup>H-NMR (CDCl<sub>3</sub>/CD<sub>3</sub>OD = 12:1, 30 °C)  $\delta$  5.35 (d, *J* = 4.8 Hz, 1H, H-6), 5.19 (s, 1H, H-1''), 4.41 (d, *J* = 7.2 Hz, 1H, H-1'  $\beta$  anomer), 4.35 (dd, *J* = 12.0, 2.0 Hz, 1H, H-6'), 4.25 (dd, *J* = 12.2, 6.6 Hz, 1H, H-6''), 4.12–4.04 (m, 1H, H-5''), 3.94 (d, *J* = 2.0 Hz, 1H, H-4'), 3.69 (dd, *J* = 9.6, 3.2 Hz, 1H, H-3'), 3.56–3.37 (m, 6H, H-2', H-5', H-3'', H-4'', H-3), 3.31–3.26 (m, 1H, H-2''), 2.40–2.26 (m, 4H,  $\alpha$ -CH<sub>2</sub> of palmitic acid, H-4), 2.03–1.78 (m, 5H, -CH<sub>2</sub>- of cholesterol), 1.68–0.98 (m, 54H, H-6'', -CH<sub>2</sub>- of palmitic acid, -CH<sub>2</sub>- and -CH of cholesterol), 0.95–0.84 (m, 15H,

-CH<sub>3</sub> of palmitic acid, -CH<sub>3</sub> of cholesterol) 0.68 (s, 3H, H-18); <sup>13</sup>C-NMR (CDCl<sub>3</sub>/CD<sub>3</sub>OD = 12:1, 30 °C) δ 174.3 (C=O of palmitic acid), 140.4 (C-5), 121.8 (C-6), 100.2 (C-1''), 99.8 (C-1'), 79.3 (C-2'), 77.6 (C-3), 77.2, 73.4 (C-4''), 72.7 (C-3''), 71.2 (C-3'), 70.4 (C-4'), 70.3 (C-2''), 68.1 (C-5''), 63.6 (C-6'), 56.6 (C-14), 56.0 (C-17), 50.1 (C-9), 42.2 (C-13), 39.6 (C-12), 39.4 (C-24), 38.4 (C-4), 37.2 (C-1), 36.6 (C-10), 36.1 (C-22), 35.7 (C-20), 34.2, 31.8 (C-8), 31.7 (C-7), 29.6 (C-2), 29.5, 29.2, 29.1, 28.1 (C-16), 27.9 (C-25), 24.8, 24.1 (C-15), 23.7 (C-23), 22.6, 22.6 (C26 or C27), 22.4 (C26 or C27), 20.9 (C-11), 19.1 (C-21), 18.5 (C-19), 17.2 (C-6''), 13.9, 11.7 (C-18); HRMS (ESI-QTOF) calcd. for C<sub>55</sub>H<sub>96</sub>NaO<sub>11</sub> [M+Na]<sup>+</sup> 955.6845; found: 955.6841.

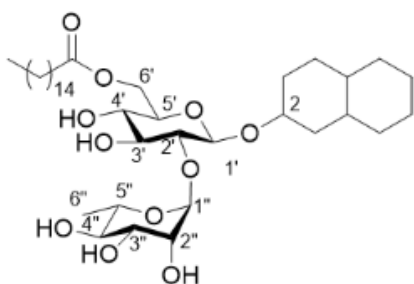

**Decahydro-2-naphthol α-L-rhamnopyranosyl-α(1→2)-6'-O-palmitoyl-β-D-glucopyranoside (1d)**

To a stirred solution of **compound 7d** (36.2 mg, 45.6 μmol) and palmitic acid (25.27 mg, 98.5 μmol) in CH<sub>2</sub>Cl<sub>2</sub> (910 μL) was added EDCI·HCl (19.4 mg, 101 μmol), DMAP (5.91 mg, 48.4 μmol) and the mixture was stirred at r.t. for 11 h. H<sub>2</sub>O (ca. 1 mL) was added to the reaction mixture, and the aqueous layer was extracted with EtOAc. The combined organic extracts was washed with 1M NaOH twice, H<sub>2</sub>O, brine, dried over anhydrous Na<sub>2</sub>SO<sub>4</sub>, filtered through a cotton plug, and then concentrated. The residue was purified by silica gel column chromatography (*n*-hexane/EtOAc=5%-40%) to give a partially purified material, which was used in the next step. A portion of the obtained material (18.11 mg) was dissolved in CHCl<sub>3</sub>/MeOH=5:1 with TFA 1 % (600 μL) and Ru cat. (1.02 mg, 1.95 μmol) was added. The reaction mixture was stirred at r.t. for 2.5 h. Additional Ru cat. (1.06 mg, 2.02 μmol) was added, and the reaction mixture was stirred at r.t. for an additional 3 h. Then, Ru cat. (626 μg, 1.19 μmol) was added, and the reaction mixture was stirred for an additional 12 h. SiliaMetS<sup>®</sup> (60 mg) was added and the reaction mixture was stirred for 30 min at r.t., filtered through a PTFE membrane filter (0.5 μm, Advantec) and concentrated. The residue was purified by silica gel column chromatography (chloroform/methanol = 3%–28%) with a pad of SiliaMetS<sup>®</sup> to afford **compound 1d** (12.3 mg, quant. over two steps) as a white solid; <sup>1</sup>H-NMR (CDCl<sub>3</sub>/CD<sub>3</sub>OD = 12:1, 30 °C) δ 5.23–5.20 (m, 1H, H-1''), 4.43–4.34 (m, 2H, H-1', H-6'), 4.26–4.21 (m, 1H, H-6'), 4.07–4.03 (m, 1H, H-5''),

3.93–3.92 (m, 1H, H-4'), 3.68 (dt,  $J = 9.6, 3.2$  Hz, 1H, H-3'), 3.52–3.36 (m, 4H, H-2', H-5', H-3'', H-4''), 3.31–3.26 (m, 1H, H-2''), 2.33 (t,  $J = 7.8$  Hz, 2H,  $\alpha$ -CH<sub>2</sub> of palmitic acid), 2.07–1.78 (m, 3H, decahydro-2-naphthol), 1.70–1.26 (m, 37H, -CH<sub>2</sub> of palmitic acid, decahydro-2-naphthol), 1.15–0.93 (m, 2H, decahydro-2-naphthol), 0.90–0.88 (m, 4H, -CH<sub>3</sub> of palmitic acid, decahydro-2-naphthol); <sup>13</sup>C-NMR (CDCl<sub>3</sub>/CD<sub>3</sub>OD = 12:1, 30 °C)  $\delta$  174.2 (C=O of palmitic acid), 100.2 (C-1'), 99.8 (C-1''), 77.6 (C-2'), 74.9 (C-2), 73.4 (C-4''), 72.6 (C-3''), 71.1 (C-3'), 70.5 (C-4'), 70.4 (C-2''), 68.3 (C-5''), 63.7 (C-6'), 35.2 (decahydro-2-naphthol), 34.1 ( $\alpha$ -CH<sub>2</sub> of palmitic acid), 33.7 (( $\omega$ -2)-CH<sub>2</sub> of palmitic acid), 31.8 (decahydro-2-naphthol), 29.4 (-CH<sub>2</sub> of palmitic acid), 29.2–29.1 (-CH<sub>2</sub> of palmitic acid), 24.8 ( $\beta$ -CH<sub>2</sub> of palmitic acid), 22.5 (( $\omega$ -1)-CH<sub>2</sub> of palmitic acid), 17.2 (C-6''), 13.9 (-CH<sub>3</sub> of palmitic acid); HRMS (ESI-QTOF) calcd. for C<sub>38</sub>H<sub>68</sub>NaO<sub>11</sub> [M+Na]<sup>+</sup> 723.4654; found: 723.4652.

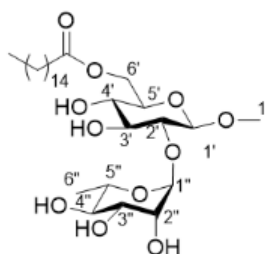

#### Methyl $\alpha$ -L-rhamnopyranosyl- $\alpha$ (1 $\rightarrow$ 2)-6'-O-palmitoyl- $\beta$ -D-glucopyranoside (**1e**)

To a stirred solution of **compound 7e** (16.0 mg, 23.8  $\mu$ mol) and palmitic acid (12.5 mg, 48.7  $\mu$ mol) in CH<sub>2</sub>Cl<sub>2</sub> (480  $\mu$ L) was added EDCI·HCl (9.88 mg, 51.5  $\mu$ mol), DMAP (2.97 mg, 24.3  $\mu$ mol) and the mixture was stirred at r.t. for 11 h. H<sub>2</sub>O (ca. 1 mL) was added to the reaction mixture, and the aqueous layer was extracted with EtOAc. The combined organic extracts was washed with 1M NaOH twice, H<sub>2</sub>O, brine, dried over anhydrous Na<sub>2</sub>SO<sub>4</sub>, filtered through a cotton plug, and then concentrated. The residue was purified by silica gel column chromatography (*n*-hexane/EtOAc=6%-50%) to give a partially purified material, which was used in the next step. A portion of the obtained material (11.4 mg) was dissolved in CHCl<sub>3</sub>/MeOH=5:1 with TFA 1 % (415  $\mu$ L) and Ru cat. (1.64 mg, 3.12  $\mu$ mol) was added. The reaction mixture was stirred at r.t. for 12 h. SiliaMetS<sup>®</sup> (57 mg) was added and the reaction mixture was stirred for 30 min at r.t., filtered through a PTFE membrane filter (0.5  $\mu$ m, Advantec) and concentrated. The residue was purified by silica gel column chromatography (chloroform/methanol = 3%–28%) with a pad of SiliaMetS<sup>®</sup> to afford **compound 1e** (5.14 mg, 73% over two steps) as a white solid; <sup>1</sup>H-NMR (CDCl<sub>3</sub>/CD<sub>3</sub>OD = 12:1)  $\delta$  5.11 (d,  $J = 1.2$  Hz, 1H, H-1''  $\alpha$  anomer), 4.39 (dd,  $J = 12.2, 2.2$  Hz, 1H, H-6'), 4.26 (dd,  $J = 12.4, 6.0$  Hz, 1H, H-6'), 4.21 (d,  $J = 7.6$  Hz, 1H, H-1'  $\beta$  anomer), 3.94–3.87 (m, 2H, H-4', H-5''), 3.67 (dd,  $J = 9.6, 3.6$  Hz, 1H, H-3'), 3.51 (s, 1H, H-1), 3.49–3.63 (m, 4H, H-2', H-5', H-3'', H-4''), 3.33–3.28 (m, 1H, H-2''), 2.35 (t,  $J = 7.8$  Hz, 2H,  $\alpha$ -CH<sub>2</sub> of palmitic acid), 1.61 (m, 2H,  $\beta$ -CH<sub>2</sub> of palmitic acid), 1.27 (m, 27H, H-6'', -CH<sub>2</sub>- of

palmitic acid), 0.88 (t,  $J = 6.8$  Hz, 3H, -CH<sub>3</sub> of palmitic acid); <sup>13</sup>C-NMR (CDCl<sub>3</sub>/CD<sub>3</sub>OD = 12:1)  $\delta$  174.4 (C=O of palmitic acid), 102.5 (C-1'), 100.7 (C-1''), 78.1 (C-2'), 73.4 (C-4''), 72.5 (C-3''), 71.0 (C-3'), 70.3 (C-4'), 70.0 (C-2''), 68.2 (C-5''), 63.4 (C-6'), 56.6 (C-1), 34.0 ( $\alpha$ -CH<sub>2</sub> of palmitic acid), 31.7 (( $\omega$ -2)-CH<sub>2</sub> of palmitic acid), 29.5 (-CH<sub>2</sub> of palmitic acid), 29.3 (-CH<sub>2</sub> of palmitic acid), 29.2 (-CH<sub>2</sub> of palmitic acid), 29.1 (-CH<sub>2</sub> of palmitic acid), 28.9 (-CH<sub>2</sub> of palmitic acid), 24.7 ( $\beta$ -CH<sub>2</sub> of palmitic acid), 22.5 (( $\omega$ -1)-CH<sub>2</sub> of palmitic acid), 16.8 (C-6''), 13.9 (-CH<sub>3</sub> of palmitic acid); HRMS (ESI-QTOF) calcd. for C<sub>29</sub>H<sub>54</sub>NaO<sub>11</sub> [M+Na]<sup>+</sup> 601.3558; found: 601.3549.

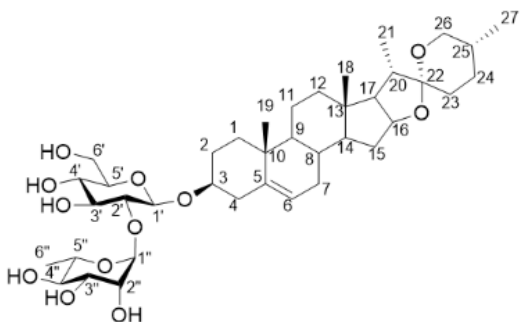

#### Diosgenyl $\alpha$ -L-rhamnopyranosyl- $\alpha(1\rightarrow2)$ - $\beta$ -D-glucopyranoside (**1a'**)

To a stirred solution of **compound 6a** (12.5 mg, 11.9  $\mu$ mol) in CHCl<sub>3</sub>/MeOH=5:1 with TFA 1 % (218  $\mu$ L), was added Ru cat. (1.59 mg, 3.03  $\mu$ mol). The mixture was stirred at r.t. for 11.5 h. SiliaMetS<sup>®</sup> (56 mg) was added to the mixture, which was filtered, then concentrated under reduced pressure, which was purified by silica gel column chromatography (chloroform/methanol=3%-28%) twice with a pad of SiliaMetS<sup>®</sup> to afford **compound 1a'** (4.86 mg, 57%) as a white solid; <sup>1</sup>H-NMR (CDCl<sub>3</sub>/CD<sub>3</sub>OD = 12:1, 30 °C)  $\delta$  5.35 (d,  $J = 5.2$  Hz, 1H, H-6), 5.19 (s, 1H, H-1''), 4.47–4.38 (m, 2H, H-1', H-16), 4.11–4.04 (m, 1H, H-5''), 3.95 (s, 1H, H-4'), 3.83 (dd,  $J = 11.8, 3.0$  Hz, 1H, H-3'), 3.75 (dd,  $J = 12.4, 4.4$  Hz, 1H, H-6'), 3.70 (dd,  $J = 9.6, 3.2$  Hz, 1H, H-6'), 3.60–3.34 (m, 7H, H-2', H-2'', H-3'', H-4'', H-3, H-26), 3.28–3.24 (m, 1H, H-5'), 2.42–2.38 (m, 1H, H-4), 2.30–2.25 (m, 1H, H-4), 2.01–1.95 (m, 2H, H-15), 1.91–1.83 (m, 3H, H-1, H-8, H-20), 1.80–1.39 (m, 11H, -CH<sub>2</sub>- and -CH of diosgenin), 1.33–0.83 (m, 5H, H-6'', H-7), 1.22–1.05 (m, 3H, H-1, H-12, H-14), 1.02 (s, 3H, H-19), 0.89–0.96 (d, 3H,  $J = 7.6$  Hz, H-21), 0.95–0.83 (m, 1H, H-9), 0.80–0.79 (m, 6H, H-18, H-27); <sup>13</sup>C-NMR (CDCl<sub>3</sub>/CD<sub>3</sub>OD = 12:1, 30 °C)  $\delta$  140.3 (C-5), 121.7 (C-6), 109.4 (C-22), 100.3 (C-1''), 99.5 (C-1'), 80.8 (C-16), 78.7 (C-2''), 77.5 (C-3), 75.3 (C-4''), 72.8 (C-3''), 71.2 (C-3'), 70.4 (C-4'), 70.2 (C-2''), 68.1 (C-5''), 66.8 (C-26), 61.9 (C-6'), 61.8 (C-17), 56.4 (C-14), 50.0 (C-9), 41.5 (C-4), 40.2 (C-20), 39.6 (C-13), 38.3 (C-12), 37.1 (C-1), 36.8 (C-10), 31.9 (C-7), 31.6 (C-15), 31.3 (C-2), 31.2 (C-8), 30.1 (C-23), 29.6 (C-25), 29.5, 28.6 (C-24), 20.7 (C-11), 19.1 (C-19), 17.2 (C-6''), 16.9 (C-27), 16.1 (C-18), 14.3 (C-21); HRMS (ESI-QTOF) calcd. for C<sub>39</sub>H<sub>62</sub>NaO<sub>12</sub> [M+Na]<sup>+</sup> 745.4133; found: 745.4124.

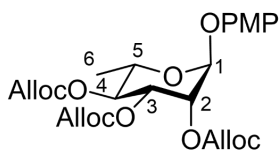

### ***p*-methoxyphenyl 2,3,4-*O*-trialloc-*L*-rhamnopyranoside (S2)**

To a stirred solution of **compound S1** (145 mg, 0.536 mmol) and *N,N,N,N*-Tetramethylethylenediamine (185  $\mu$ L, 1.24 mmol) in  $\text{CH}_2\text{Cl}_2$  (4.5 mL) was added Allyl Chloroformate (250  $\mu$ L, 2.36 mmol) at 0  $^\circ\text{C}$ , and the mixture was stirred at 0  $^\circ\text{C}$  for 1 h.  $\text{CH}_2\text{Cl}_2$  (ca. 10 mL) was added to the reaction mixture. The mixture was cooled to 0  $^\circ\text{C}$ , and sat. aq.  $\text{NaHCO}_3$  (ca. 10 mL) was added. The aqueous layer was extracted with  $\text{CH}_2\text{Cl}_2$ . The combined organic extracts were washed with  $\text{H}_2\text{O}$  and brine, dried over anhydrous  $\text{Na}_2\text{SO}_4$ , filtered filtered through a cotton plug, and concentrated. The residue was purified by silica gel column chromatography (*n*-hexane/EtOAc=8/1-4/1) to afford **compound S2** (256 mg, 91%) as colorless oil;  $^1\text{H-NMR}$  ( $\text{CDCl}_3$ )  $\delta$  7.02–6.97 (m, 2H, Ar-H of PMP), 6.83 (m, 2H, Ar-H of PMP), 5.99–5.87 (m, 3H, -CH= of alloc), 5.5.45 (d,  $J = 1.6$  Hz, H-1  $\alpha$  anomer), 5.41–5.32 (m, 5H), 5.01 (t,  $J = 9.8$  Hz, 1H, H-4), 4.69–4.61 (m, 6H, -CH<sub>2</sub>- of alloc), 4.09–4.02 (m, 1H, H-5), 3.78 (s, 3H, -OCH<sub>3</sub> of PMP), 1.26 (d,  $J = 6.4$  Hz, 3H, H-6);  $^{13}\text{C-NMR}$  ( $\text{CDCl}_3$ )  $\delta$  155.2 (C=O of alloc), 154.2 (C=O of alloc and *ipso*-Ph of PMP), 153.9 (C=O of alloc), 149.7 (*p*-Ph of PMP), 131.3 (=CH<sub>2</sub> of alloc), 131.2 (=CH<sub>2</sub> of alloc), 131.0 (=CH<sub>2</sub> of alloc), 119.4 (-CH= of alloc), 118.9 (-CH= of alloc), 118.9 (-CH= of alloc), 117.6 (*m*-Ph of PMP), 114.6 (*o*-Ph of PMP), 96.1 (C-1), 74.6 (C-4), 72.8 (C-2, C-3), 69.1 (-CH<sub>2</sub>- of alloc), 68.9 (-CH<sub>2</sub>- of alloc), 68.8 (-CH<sub>2</sub>- of alloc), 66.9 (C-5), 55.6 (-OCH<sub>3</sub> of PMP), 17.2 (C-6); HRMS (ESI-QTOF) calcd. for  $\text{C}_{25}\text{H}_{30}\text{NaO}_{12}$   $[\text{M}+\text{Na}]^+$  545.1629; found: 545.1632.

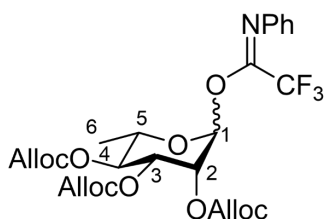

### **2,3,4-*O*-trialloc- $\alpha$ -*L*-rhamnopyranosyl *N*-phenyltrifluoroacetimidate (5)**

To a stirred solution of **compound S2** (147 mg, 282  $\mu$ mol) in  $\text{CH}_3\text{CN}/\text{H}_2\text{O}=4/1$  (14 mL) was added CAN (306 mg, 55.8  $\mu$ mol), and the mixture was stirred at 0  $^\circ\text{C}$ . Additional portions of CAN (128 mg, 46 mg, and 65 mg) were added after 1 h, 2 h 25 min, and 3 h, respectively. After stirring for a total of 3 h 5 min, brine (ca. 10 mL) was added to the mixture, and the aqueous layer was extracted with EtOAc. The combined organic extracts were washed with brine, dried over anhydrous  $\text{Na}_2\text{SO}_4$ , filtered filtered through a cotton plug, and concentrated. The residue was purified by silica gel column

chromatography (*n*-hexane/EtOAc=5/1-2/1) to afford a red oil. The obtained material was dissolved in CH<sub>2</sub>Cl<sub>2</sub> (5.8 mL) and treated with DMAP (24.7 mg, 202 μmol), DIPEA (98 μL, 0.58 mmol), and 2,2,2-trifluoro-*N*-phenylacetimidoyl (PTFAI) chloride (50 mL, 0.32 mmol). After stirring for 1 h at r.t., the reaction mixture was concentrated. The residue was purified by silica gel column chromatography (*n*-hexane/EtOAc=15/1-10/1) to afford **compound 5** (anomer mixture 74.2 mg, 45% over two steps) as white solid;  $[\alpha]_D^{25}$  -13 (c 1.03, CHCl<sub>3</sub>); <sup>1</sup>H-NMR (CDCl<sub>3</sub>) δ 7.31 (t, *J* = 8.0 Hz, 2H, Ar-H of PTFAI), 7.12 (t, *J* = 7.6 Hz, 1H, Ar-H of PTFAI), 6.83 (d, *J* = 7.6 Hz, 2H, Ar-H of PTFAI), 6.29 (bs, 1H, H-1), 5.97–5.88 (m, 3H, -CH= of alloc), 5.43–5.41 (m, 1H, H-2), 5.41–5.34 (m, 3H, =CH<sub>2</sub> of alloc), 5.31–5.26 (m, 3H, =CH<sub>2</sub> of alloc), 5.20 (dd, *J* = 10.4, 3.6 Hz, 1H, H-3), 5.04 (dd, *J* = 2.4, 2.0 Hz, 1H, H-4), 4.68–4.64 (m, 6H, -CH<sub>2</sub>- of alloc), 4.08–4.02 (m, 1H, H-5), 1.34 (d, *J* = 6.4 Hz, 3H, H-6); <sup>13</sup>C-NMR (CDCl<sub>3</sub>) δ 154.0 (C=O of alloc), 153.9 (C=O of alloc), 153.6 (C=O of alloc), 142.8 (*ipso*-Ph of PTFAI), 131.1 (=CH<sub>2</sub> of alloc), 131.0 (=CH<sub>2</sub> of alloc), 130.8 (=CH<sub>2</sub> of alloc), 128.7 (*m*-Ph of PTFAI), 124.6 (*p*-Ph of PTFAI), 119.4 (-CH= of alloc), 119.2 (*o*-Ph of PTFAI), 118.9 (-CH= of alloc), 118.8 (-CH= of alloc), 93.2 (H-1), 73.8 (C-4), 72.4 (C-3), 71.2 (C-2), 69.2 (C-5), 68.9 (-CH<sub>2</sub>- of alloc), 68.9 (-CH<sub>2</sub>- of alloc), 68.9 (-CH<sub>2</sub>- of alloc), 17.2 (C-6); HRMS (ESI-QTOF) calcd. for C<sub>26</sub>H<sub>28</sub>NaO<sub>11</sub> [M+Na]<sup>+</sup> 610.1507; found: 610.1505.

## 2. Biology

### Mincle GFP reporter assay<sup>6</sup>

The 2B4 NFAT-GFP reporter cells were established in the author's laboratory (S. Yamasaki, Osaka University) as previously described.<sup>6</sup> Briefly, the host 2B4 T-cell hybridoma, which carries an NFAT-GFP reporter, was transfected with a pMX-IRES-hCD8 vector encoding either human or mouse Mincle, along with an expression plasmid for the FcR<sub>γ</sub> chain.

For the ligand stimulation assay, 2B4 NFAT-GFP reporter cells were cultured in RPMI 1640 (Nacalai Tesque) supplemented with 10% fetal bovine serum (FBS; Biowest). The ligands were dissolved in CH<sub>2</sub>Cl<sub>2</sub>/MeOH (2:1) at 1 mM, diluted in isopropanol, and added to 96-well plates at the indicated concentrations. After evaporation of the solvent, the 2B4-NFAT-GFP reporter cells (6×10<sup>4</sup> cells/well) expressing human Mincle, mouse Mincle, or FcR<sub>g</sub> only were seeded and incubated at 37°C for 18 h. The activation of the cells was monitored by measuring GFP expression using flow cytometry.

All assays were performed in triplicate, except for one condition in Fig. 2C (mMincle, compound 1e at 1.0 nmol/well, *n* = 2). Data were analyzed and visualized using GraphPad Prism software. Results are presented as the mean ± s.d. of representative data from at least two or three independent experiments.

### **Mincle Binding Assay<sup>7</sup>**

The ligands solution (1 mM in CH<sub>2</sub>Cl<sub>2</sub>/MeOH (2:1)) were diluted in isopropanol and added to 96-well plates with the indicated concentrations, followed by evaporation of the solvent. After blocking with 5% BSA in Tris sodium magnesium (TMS) buffer, the plates were incubated with human Mincle-Fc (hMincle-Fc) or human IgG-Fc (hIgG-Fc) as a negative control at r.t. for 4 h. The bound fusion proteins were detected using a direct ELISA format. The plates were washed five times with TMS buffer followed by incubation with the HRP-conjugated anti-human IgG antibody (1:4000 dilution) at r.t. for 1 h. After final washing, the binding was visualized using substrate solution (at r.t. for 30 min in dark) and the reaction was quenched with stop solution. The absorbance at 450 nm was measured using a microplate reader.

## Reference

1. T. Watanabe, M. Nagai, Y. Ishibashi, M. Iwasaki, M. Mizoguchi, M. Nagata, T. Imai, K. Takato, A. Imamura, Y. Kakuta, T. Teramoto, M. Tani, J. Matsuda, H. Ishida, S. Yamasaki, N. Okino and M. Ito, *PLoS Pathog.*, 2025, **21**, e1013089.
2. a) T. Matsumaru, K. Sueyoshi, K. Okubo, S. Fujii, K. Sakuratani, R. Saito, K. Ueki, S. Yamasaki and Y. Fujimoto, *Bioorg. Med. Chem.*, 2022, **75**, 117045.  
b) T. Matsumaru, R. Ikeno, Y. Shuchi, T. Iwamatsu, T. Tadokoro, S. Yamasaki, Y. Fujimoto, A. Furukawa, K. Maenaka, *Chem. Commun.*, 2019, **55**, 711–714.
3. A. Furukawa, Y. Shuchi, J. Wang, P. Guillen-Poza, S. Ishizuka, M. Kagoshima, R. Ikeno, H. Kumeta, S. Yamasaki, T. Matsumaru and T. Saitoh, *Structure*, 2023, **31**, 1077–1085.e5.
4. C. Fontana, G. Widmalm, *Chem. Rev.*, 2023, **123**, 1040–1120.
5. S. Tanaka, H. Saburi, Y. Ishibashi and M. Kitamura, *Org. Lett.* 2004, **6**, 1873–1875.
6. S. Yamasaki, E. Ishikawa, M. Sakuma, H. Hara, K. Ogata and T. Saito, *Nat Immunol*, 2008, **9**, 1179–1188.
7. M. Watanabe, Z. Omahdi and S. Yamasaki, in *Lectin Purification and Analysis: Methods and Protocols*, J. Hirabayashi, Springer, New York, 2020, **vol. 2132**, ch. 12, pp. 119–128.



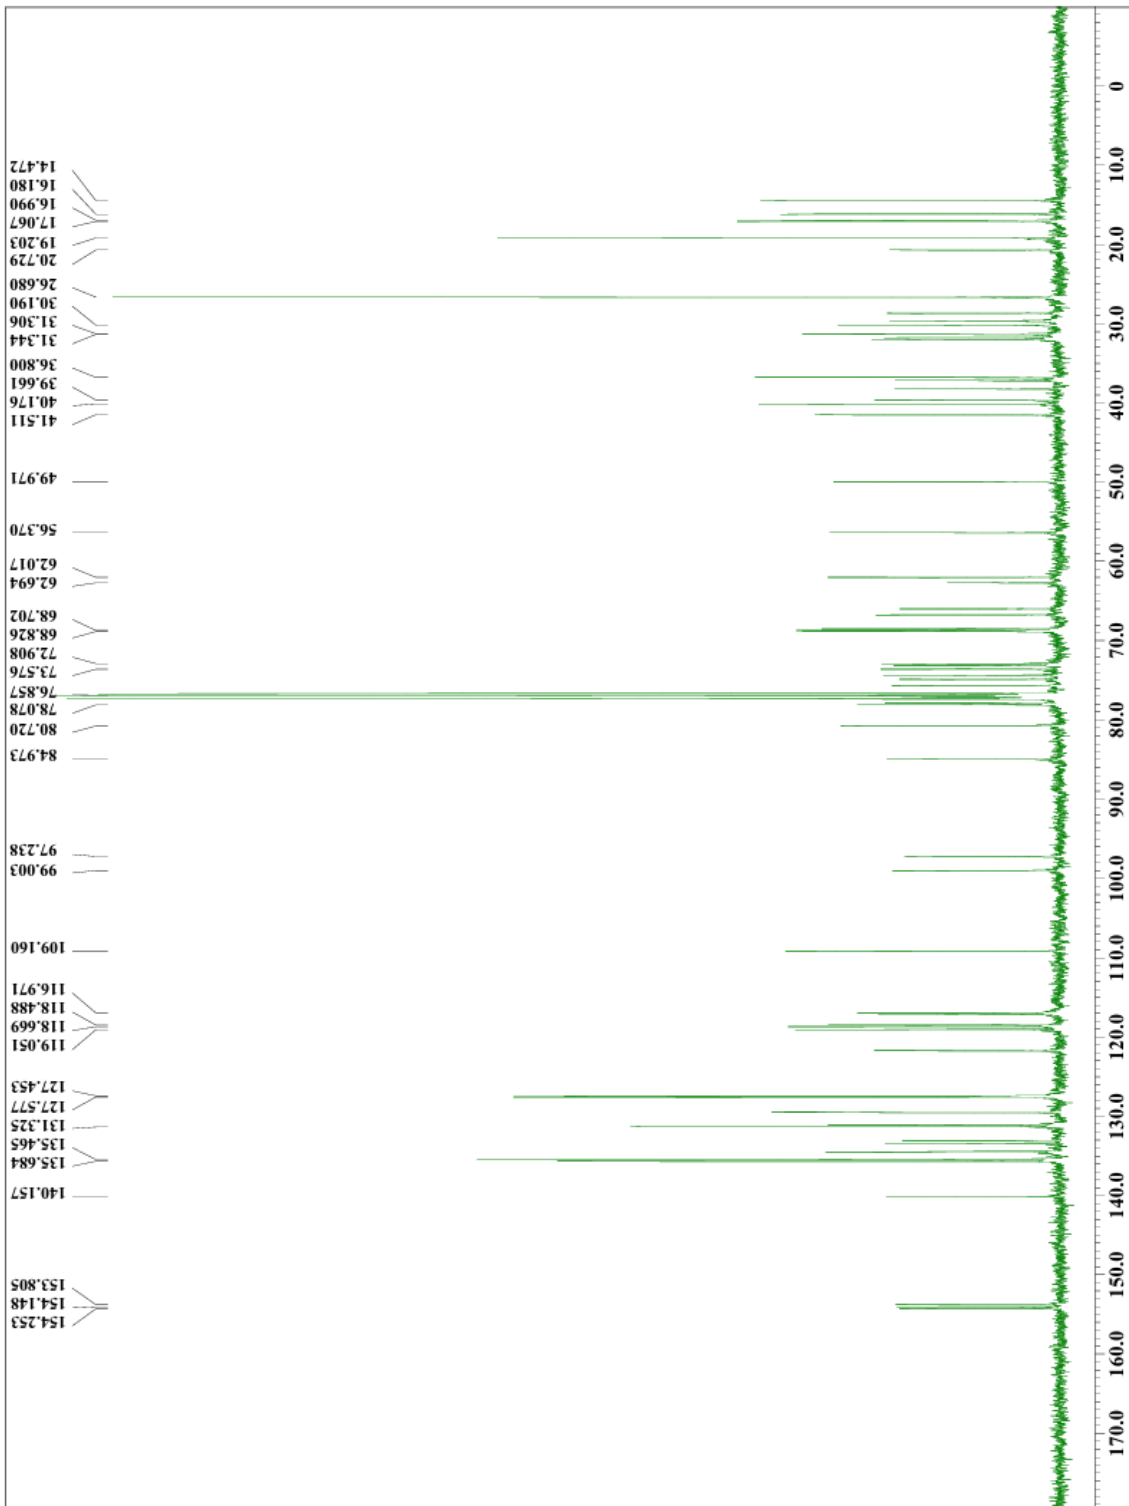

**$\beta$ -sitosteryl (2,3,4-*O*-trialloc- $\alpha$ -L-rhamnopyranosyl)-(1 $\rightarrow$ 2)-3,4-*O*-diallyl-6-*O*-*tert*-butyldiphenylsilyl- $\beta$ -D-glucopyranoside (6b)**

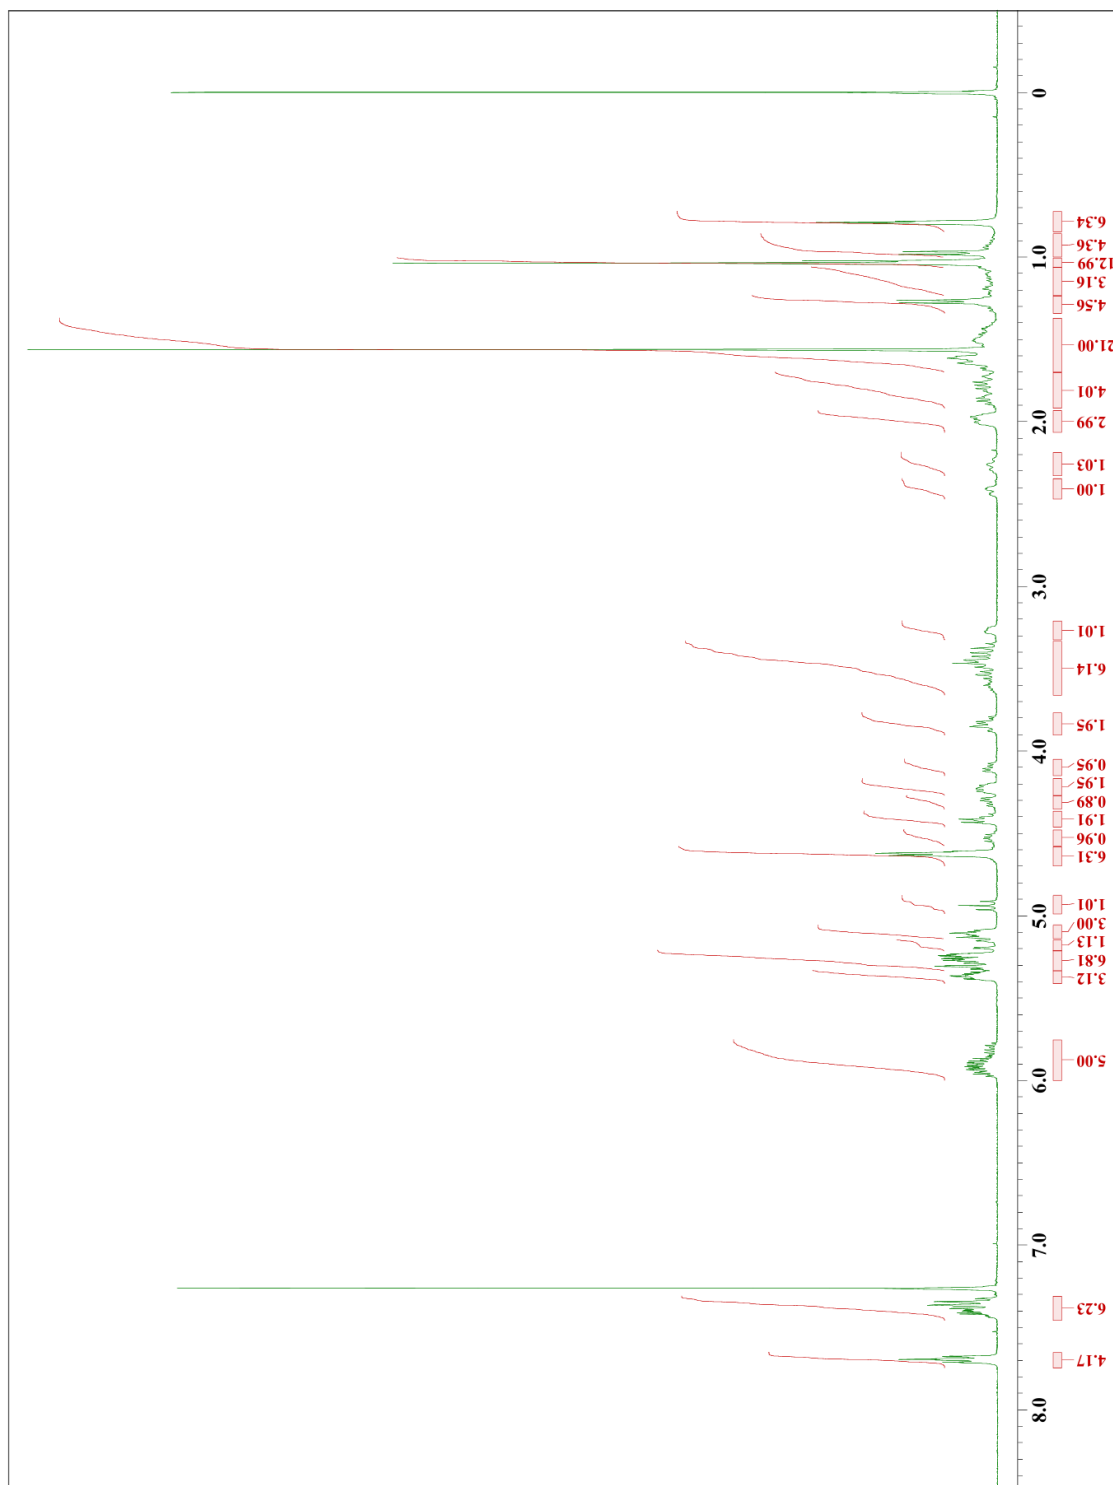

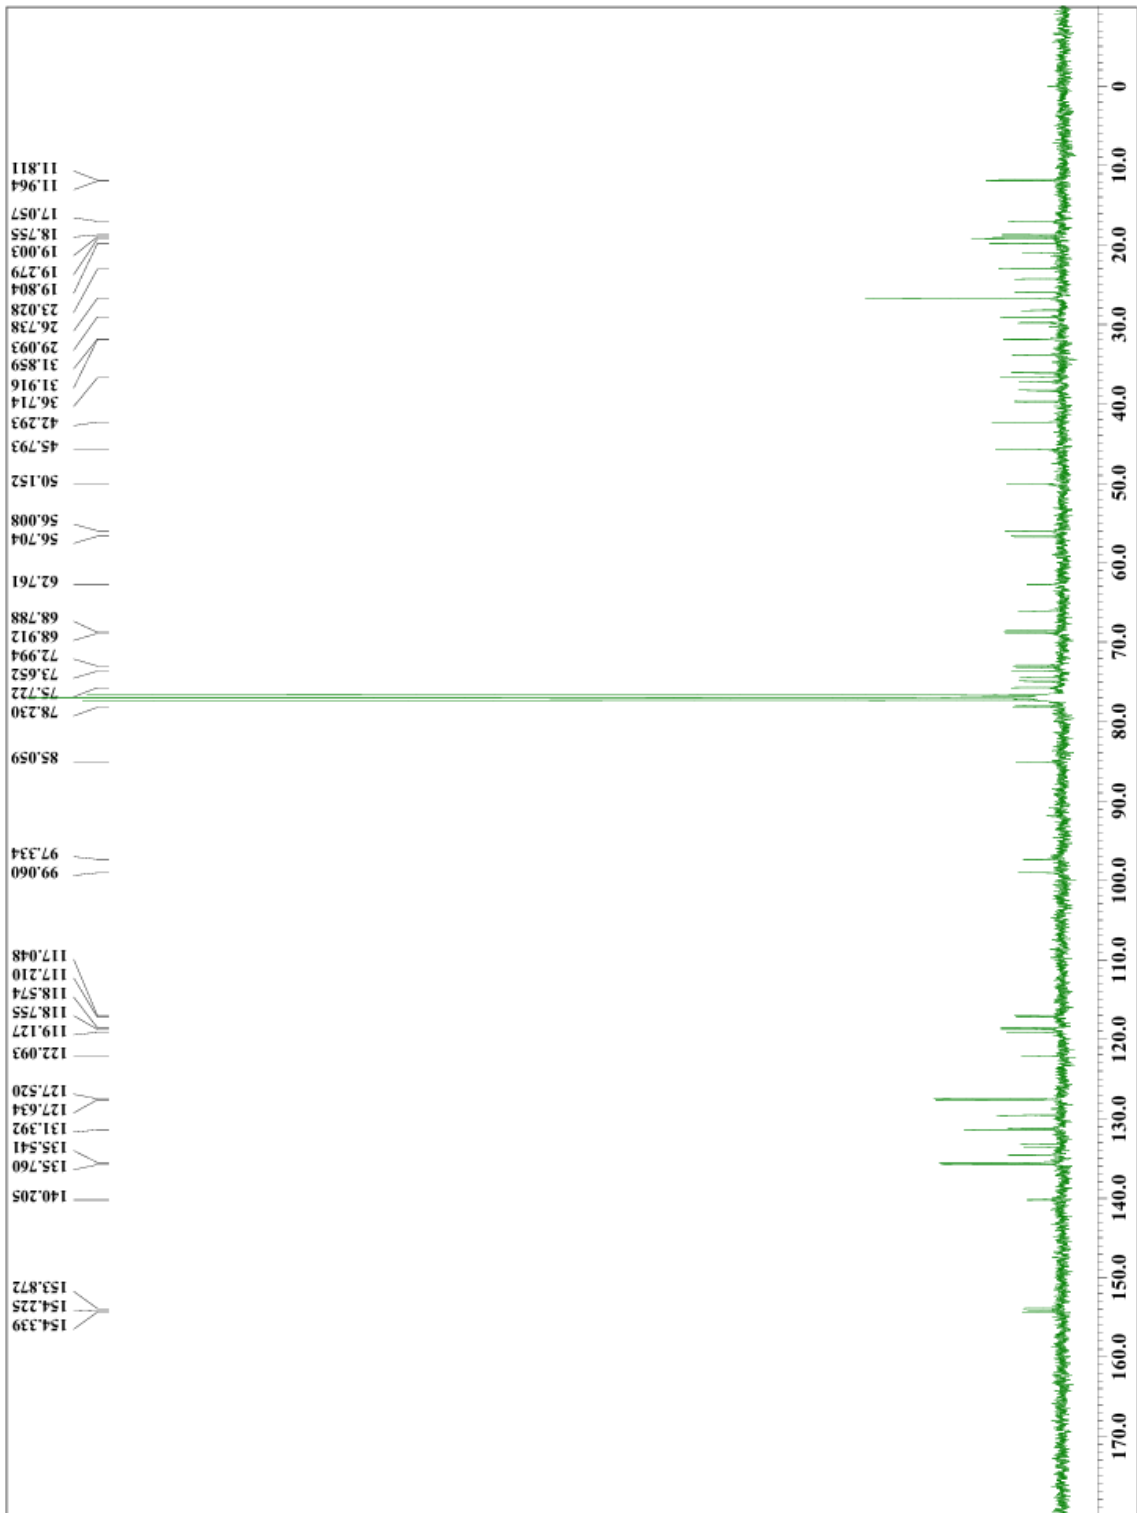

cholesteryl (2,3,4-*O*-trialloc- $\alpha$ -L-rhamnopyranosyl)-(1 $\rightarrow$ 2)-3,4-*O*-diallyl-6-*O*-*tert*-butyldiphenylsilyl- $\beta$ -D-glucopyranoside (6c)

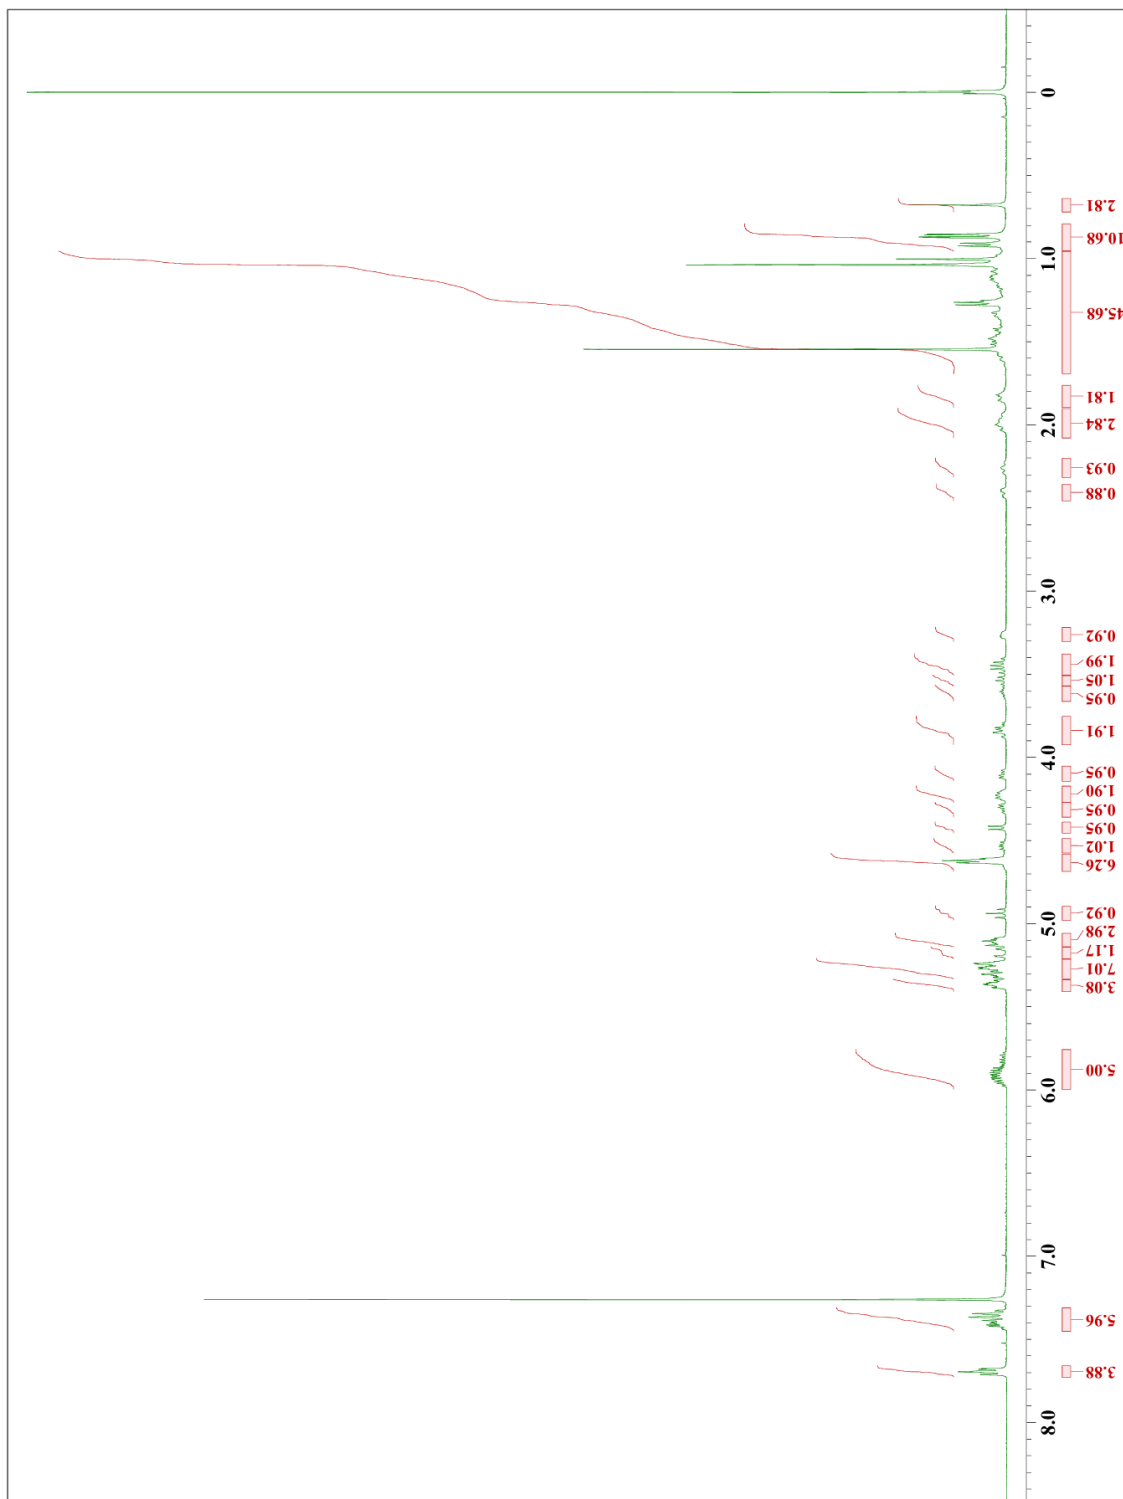

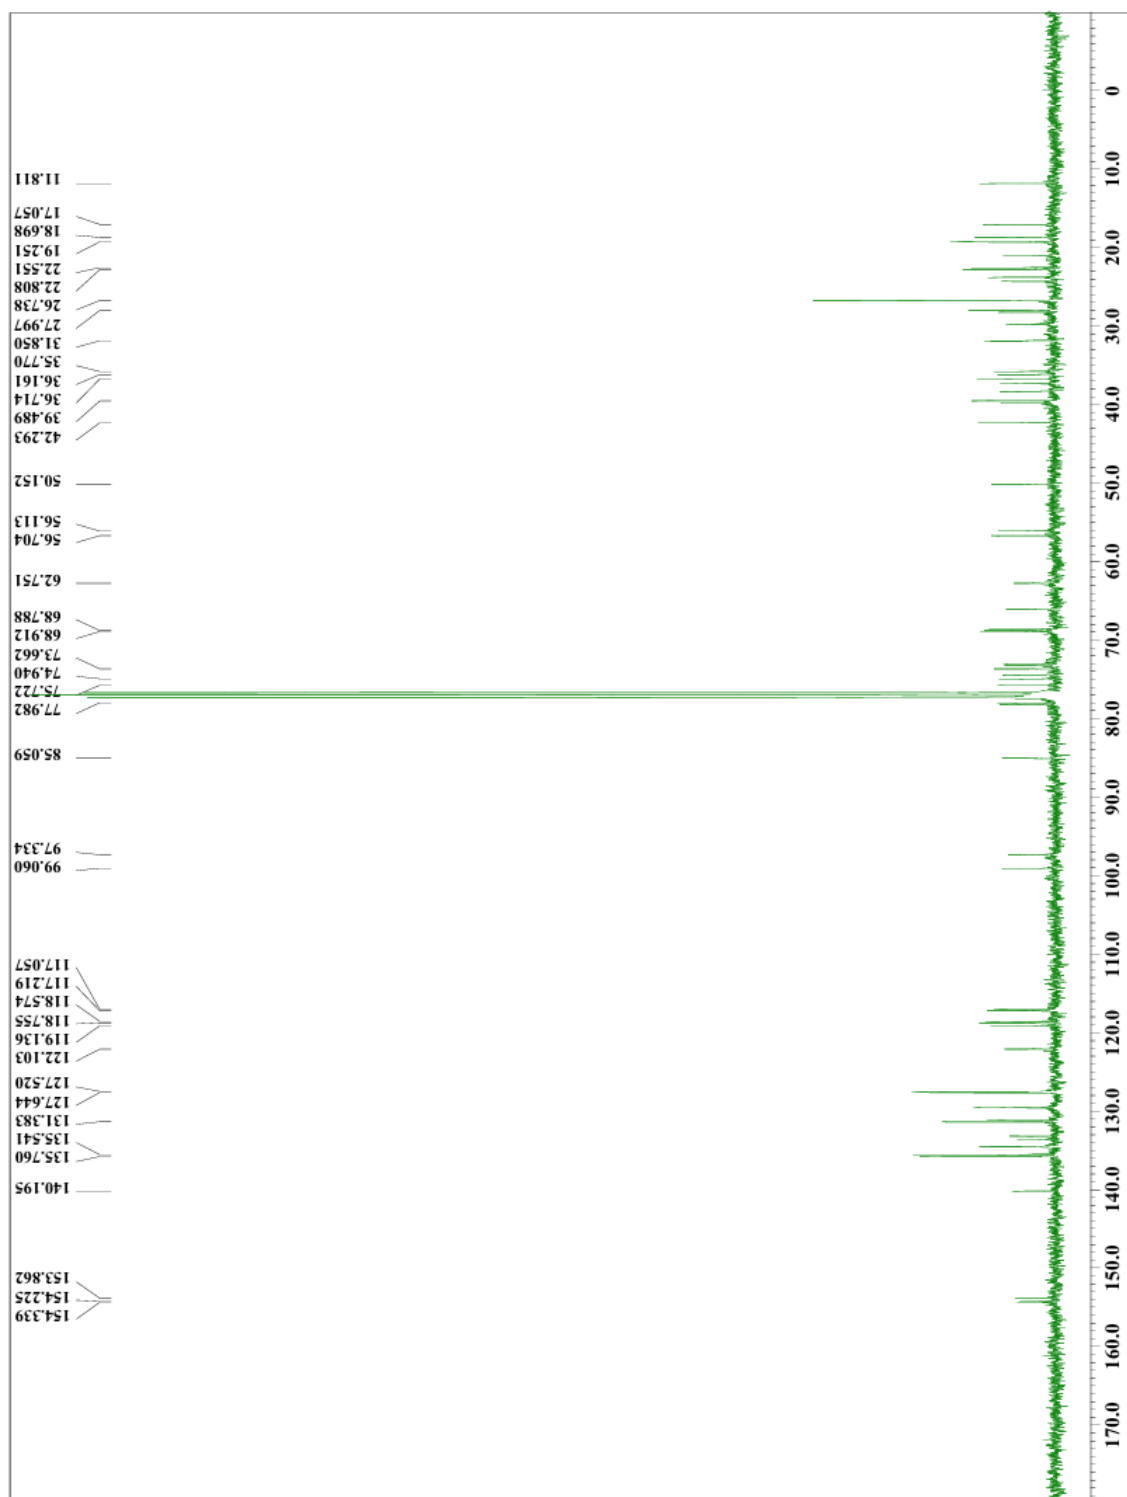

decahydro-2-naphthol (2,3,4-*O*-trialloc- $\alpha$ -L-rhamnopyranosyl)-(1 $\rightarrow$ 2)-3,4-*O*-diallyl-6-*O*-*tert*-butyldiphenylsilyl- $\beta$ -D-glucopyranoside (6d)

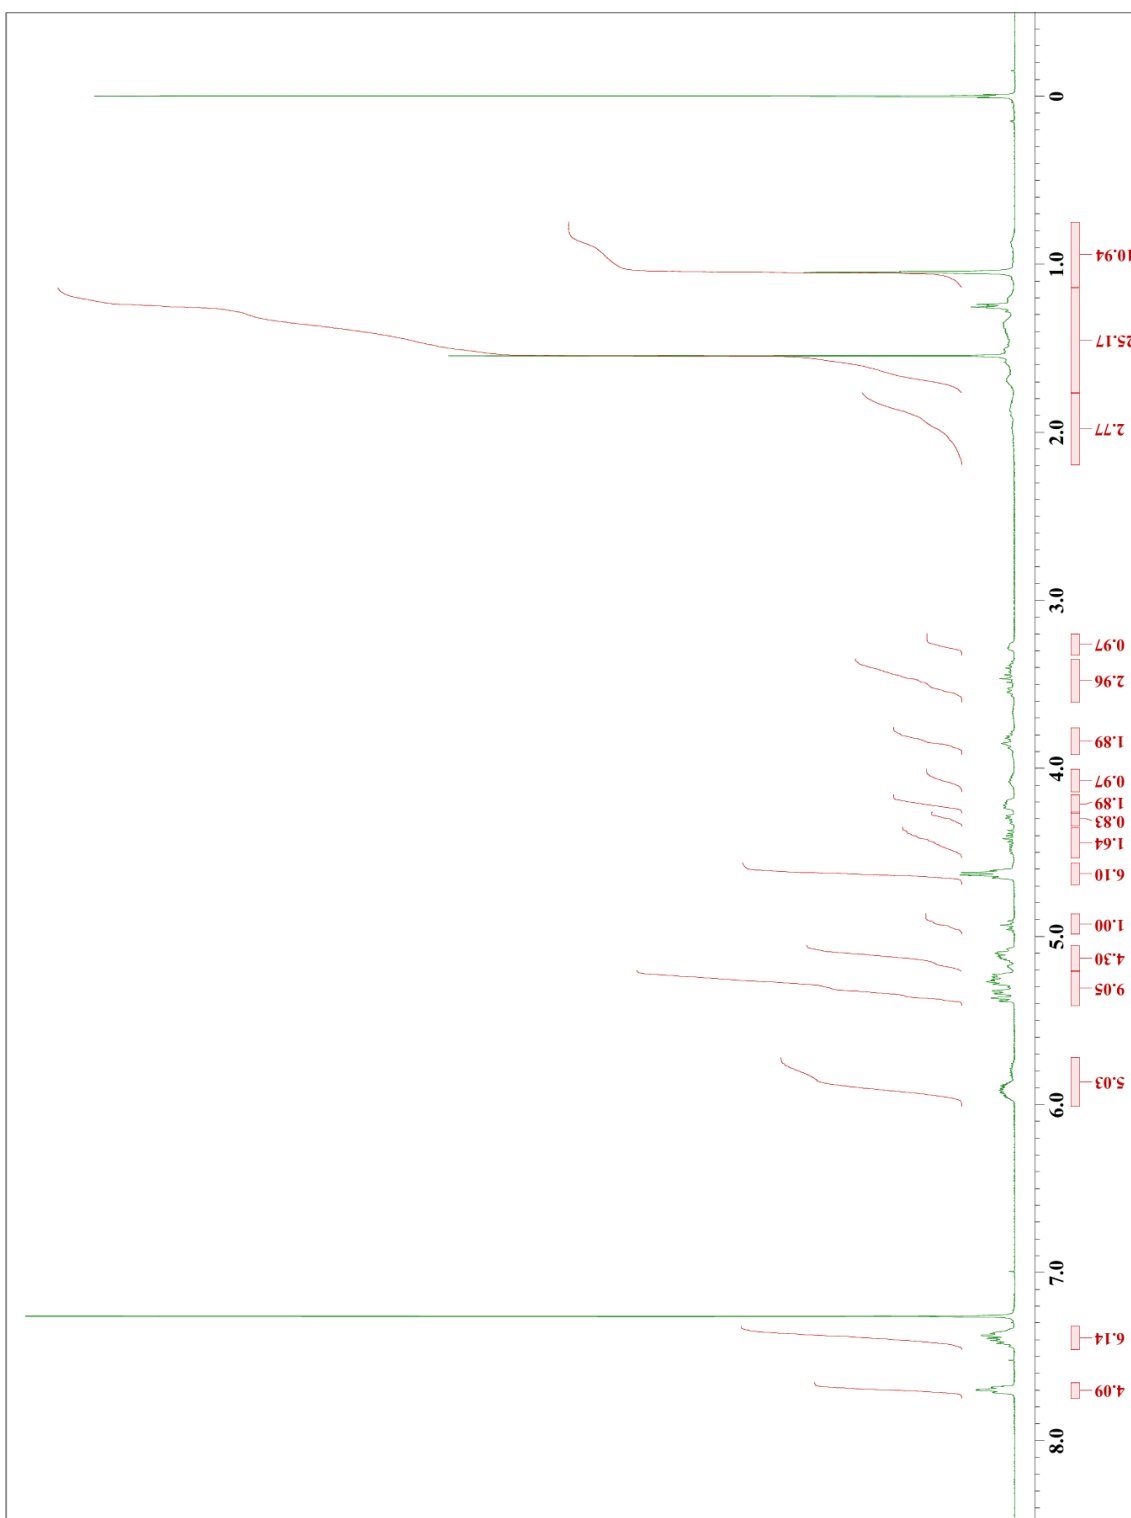

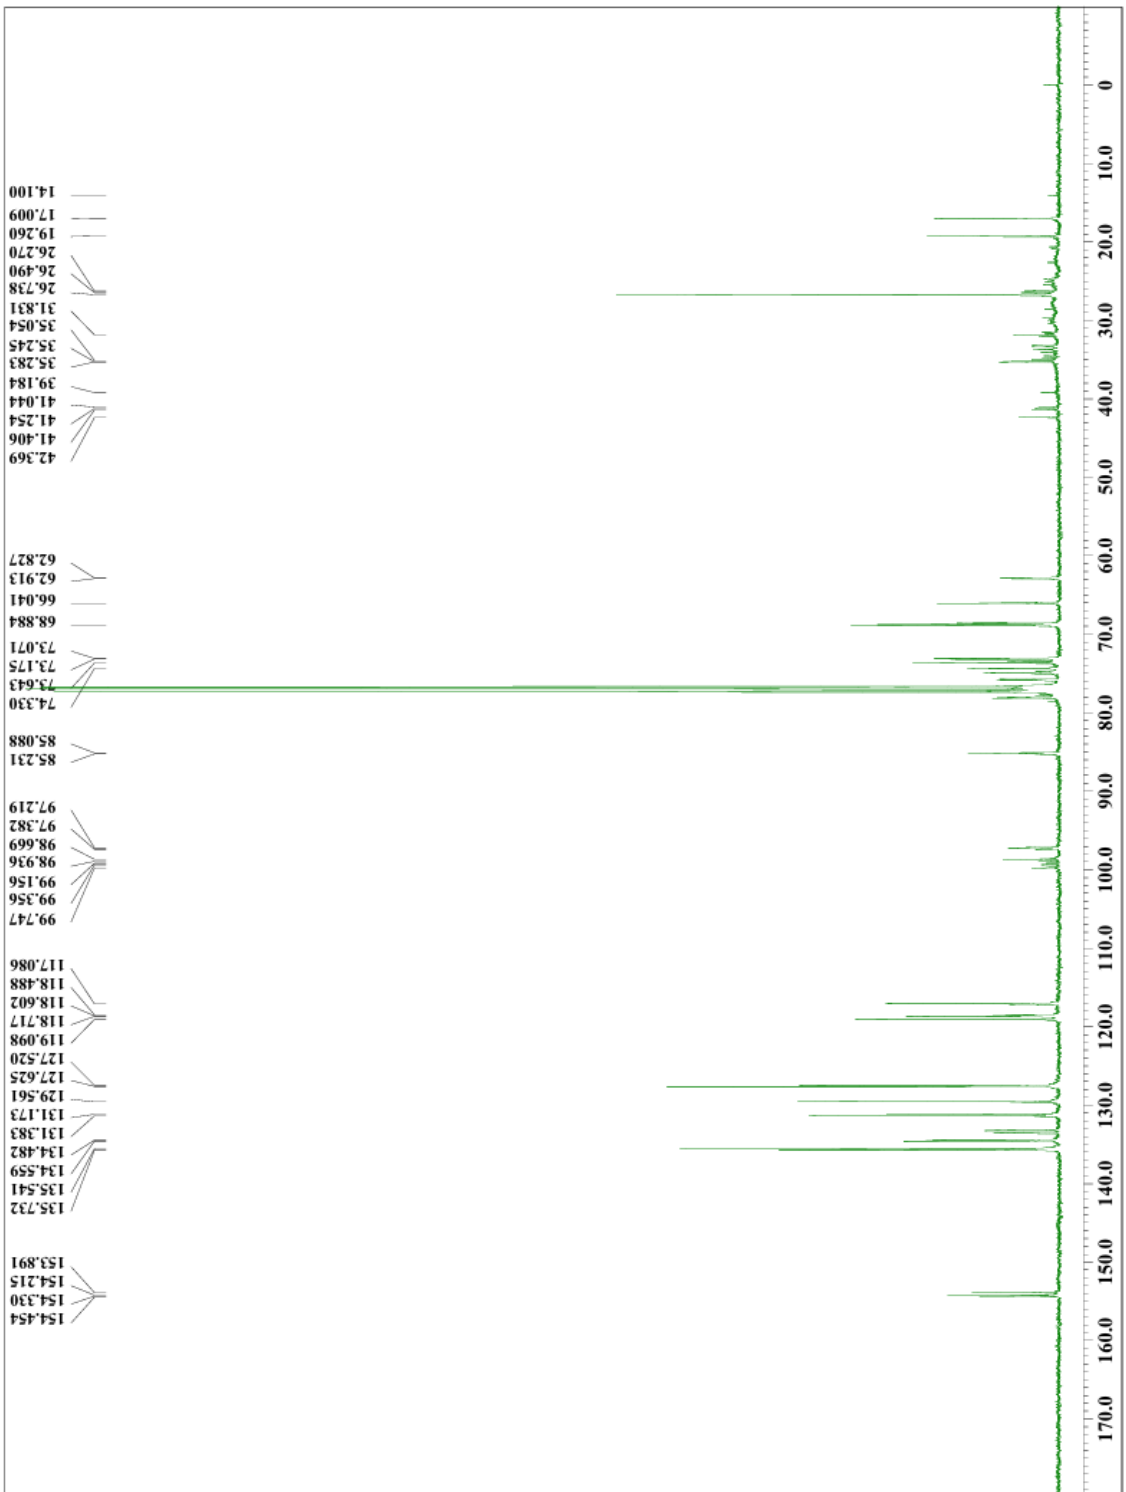

**methyl (2,3,4-*O*-trialloc- $\alpha$ -L-rhamnopyranosyl)-(1 $\rightarrow$ 2)-3,4-*O*-diallyl-6-*O*-*tert*-butyldiphenylsilyl- $\beta$ -D-glucopyranoside (6e)**

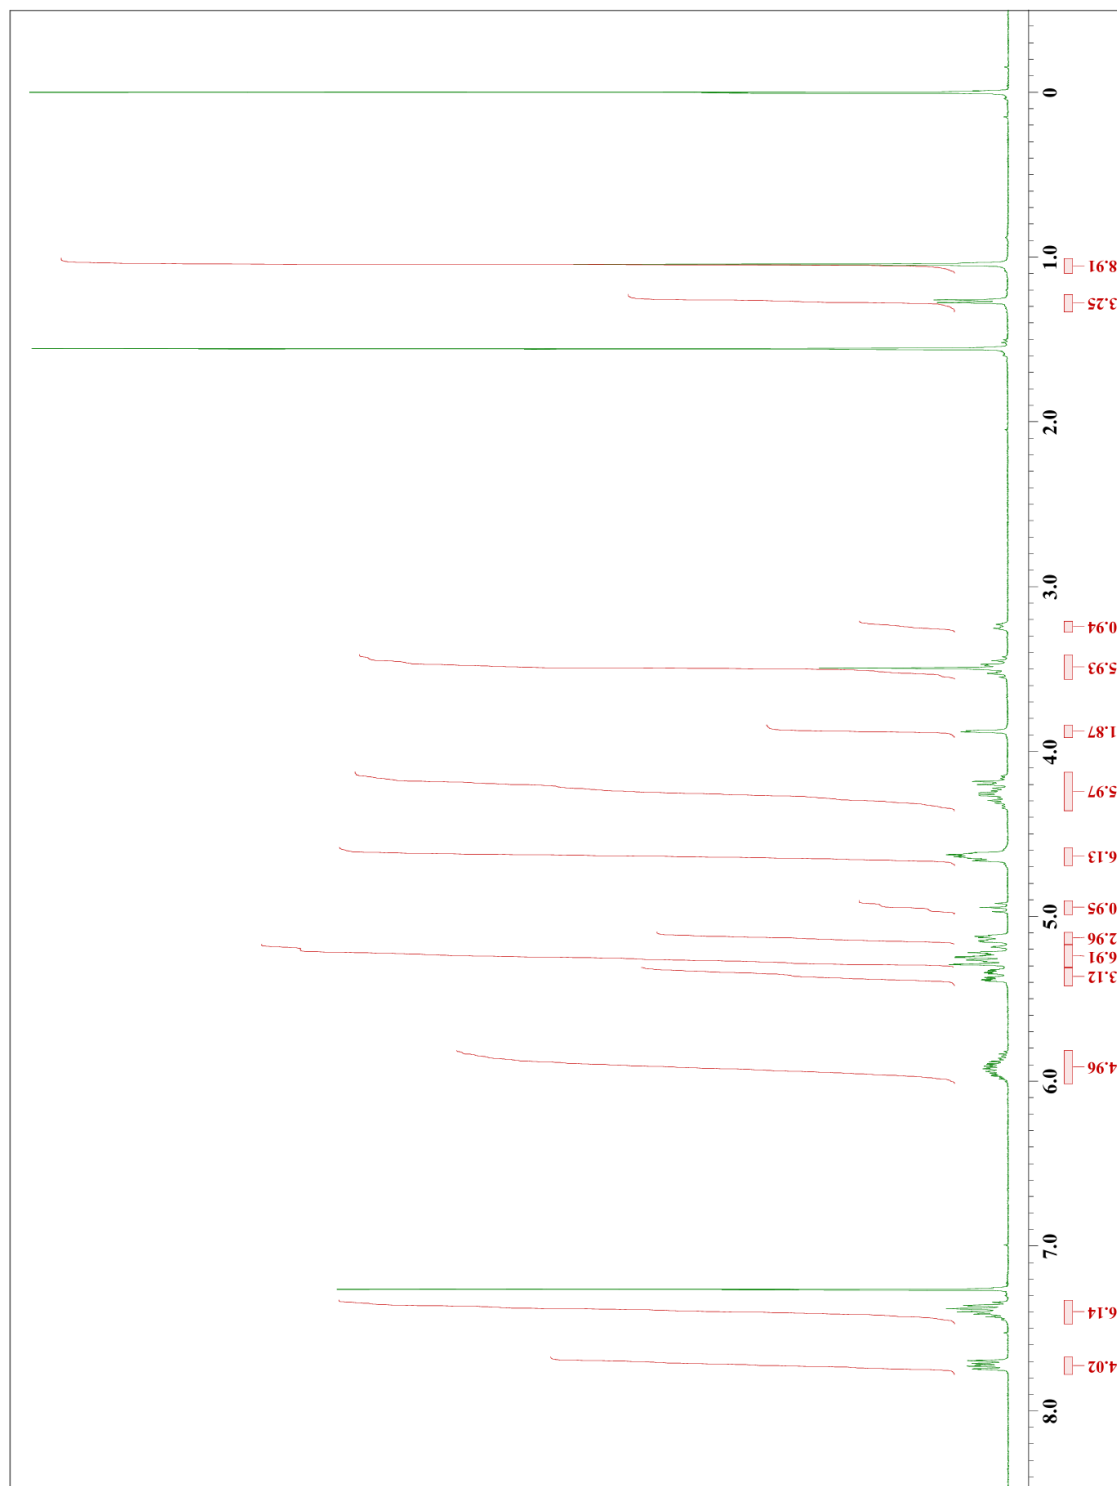

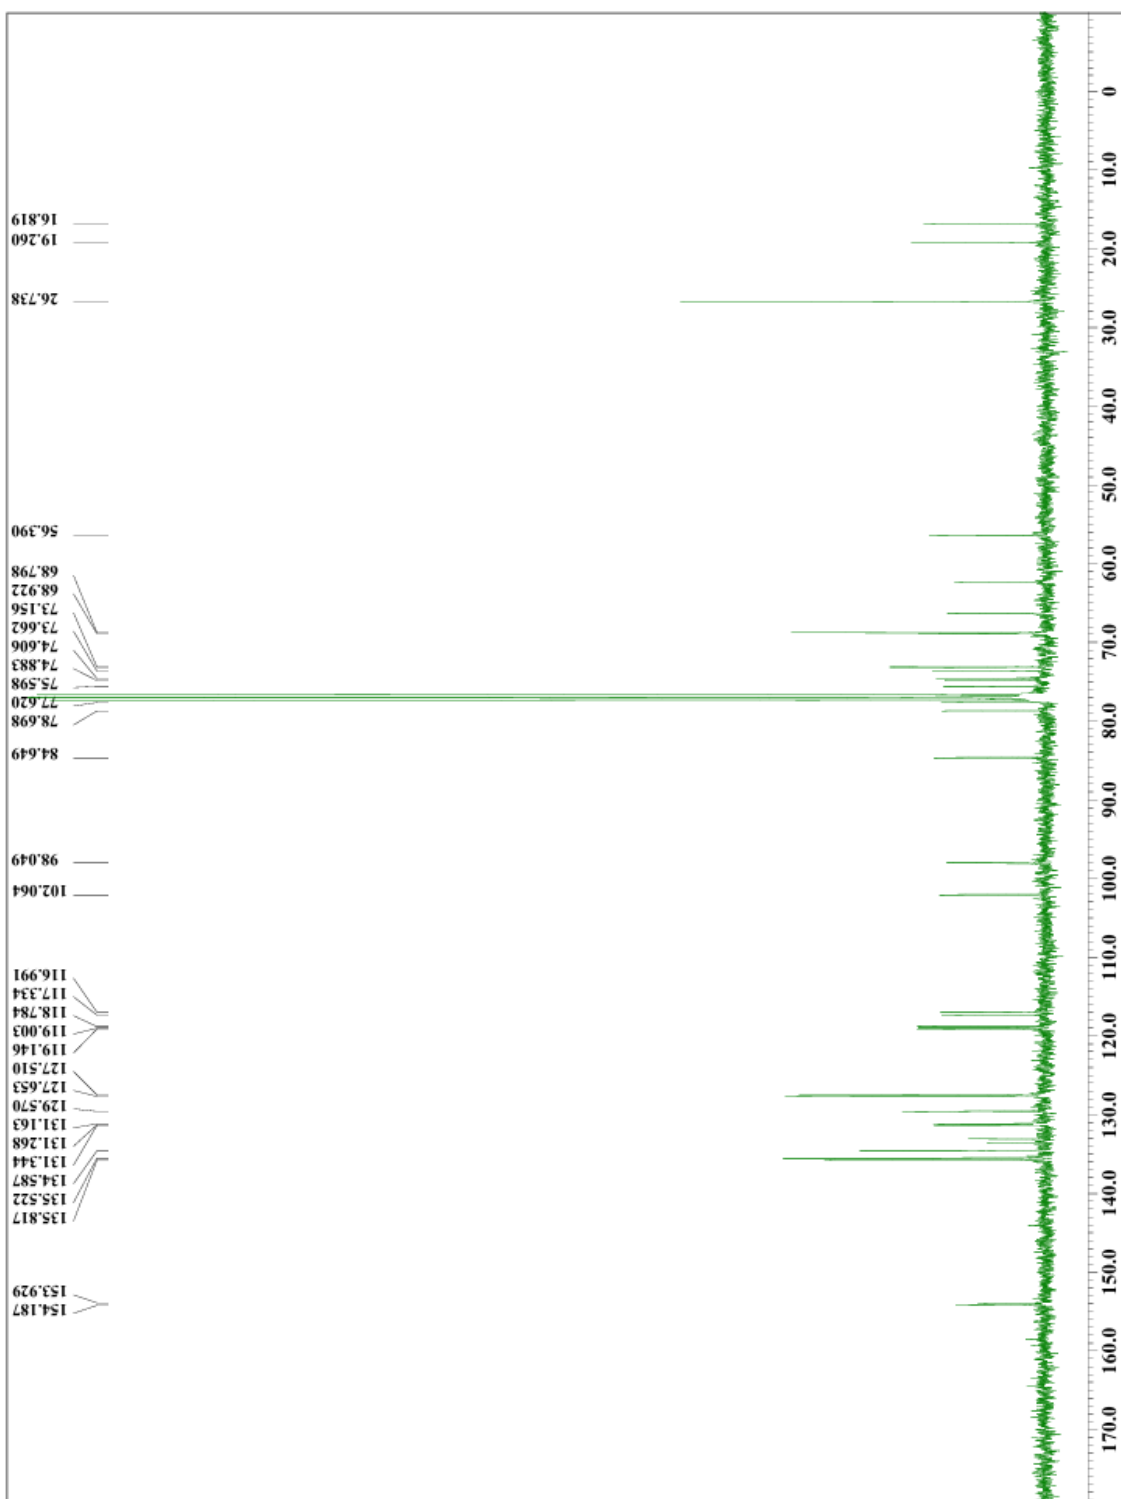

diosgenyl (2,3,4-*O*-trialloc- $\alpha$ -L-rhamnopyranosyl)-(1 $\rightarrow$ 2)-3,4-*O*-diallyl- $\beta$ -D-glucopyranoside

(7a)

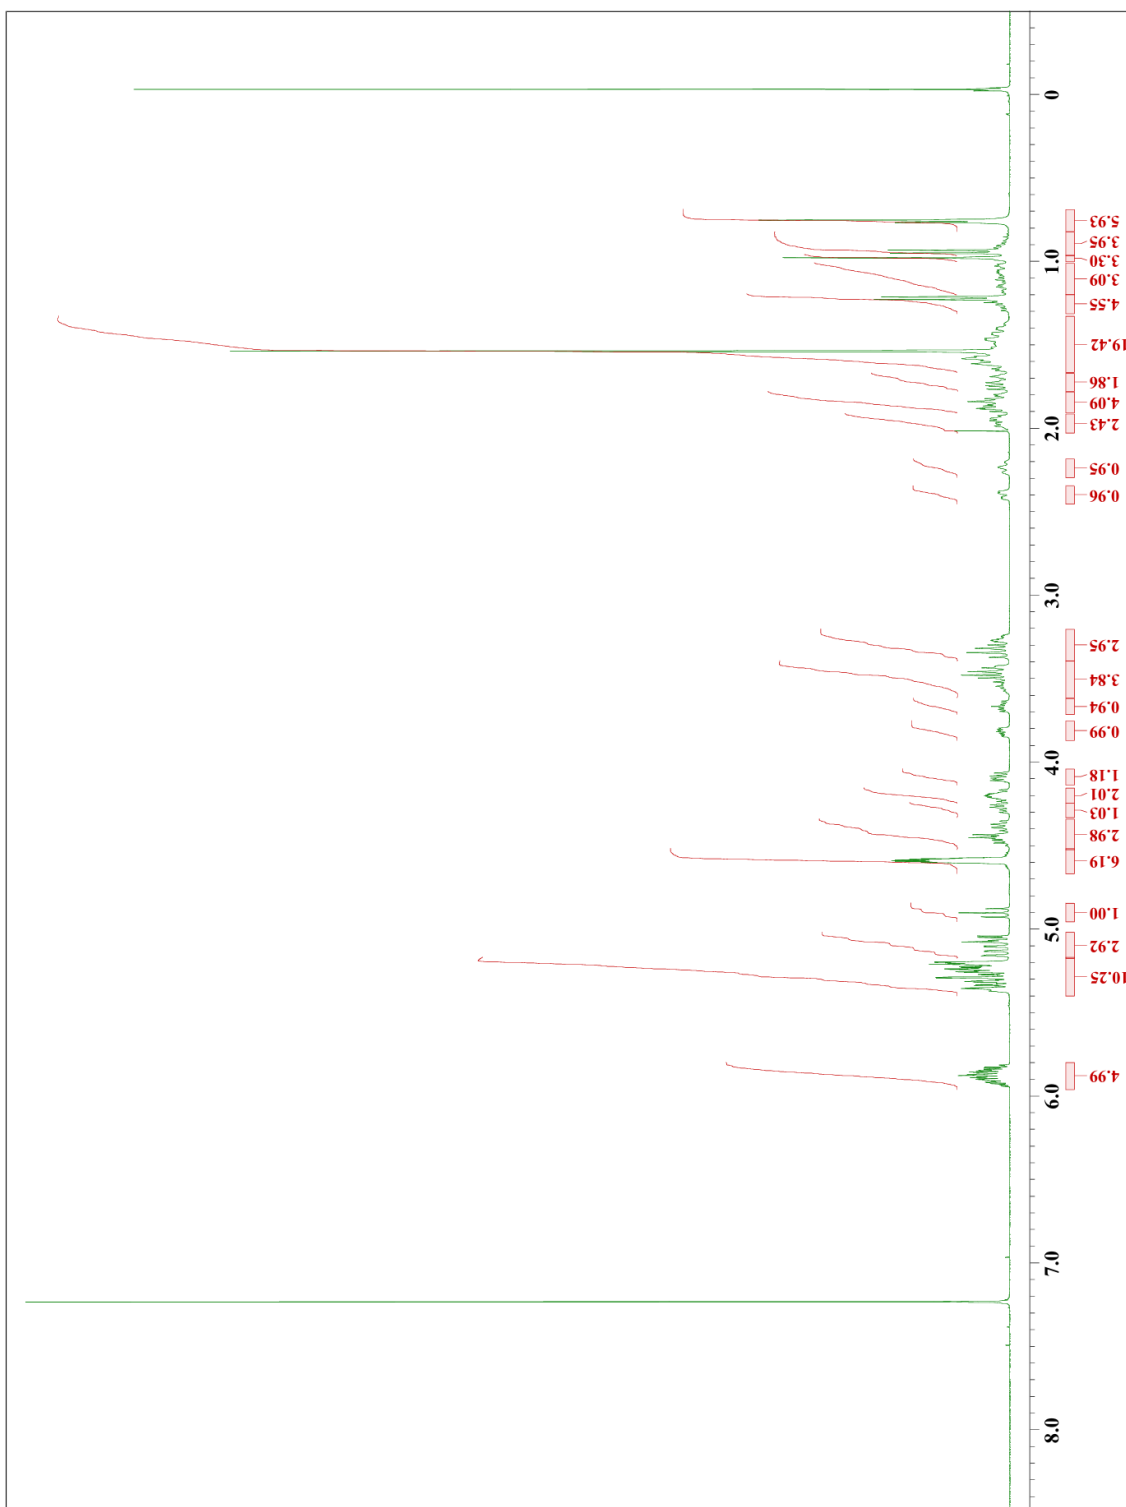

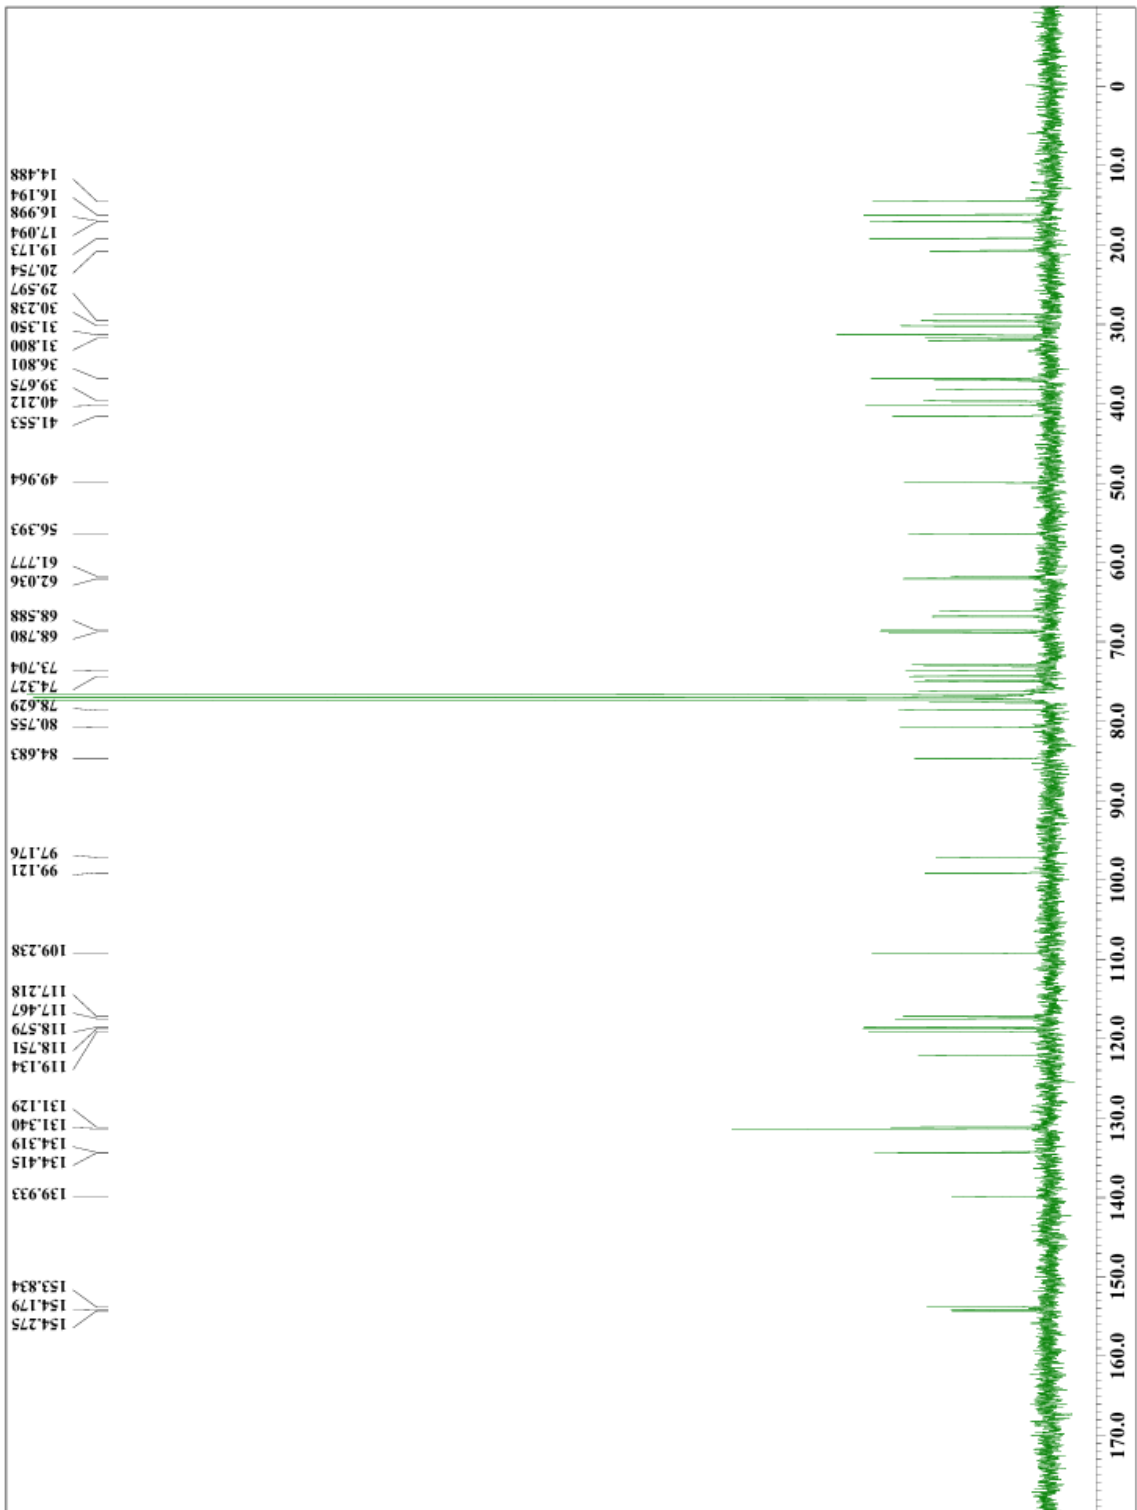

**$\beta$ -sitosterol (2,3,4-*O*-trialloc- $\alpha$ -L-rhamnopyranosyl)-(1 $\rightarrow$ 2)-3,4-*O*-diallyl- $\beta$ -D-glucopyranoside  
(7b)**

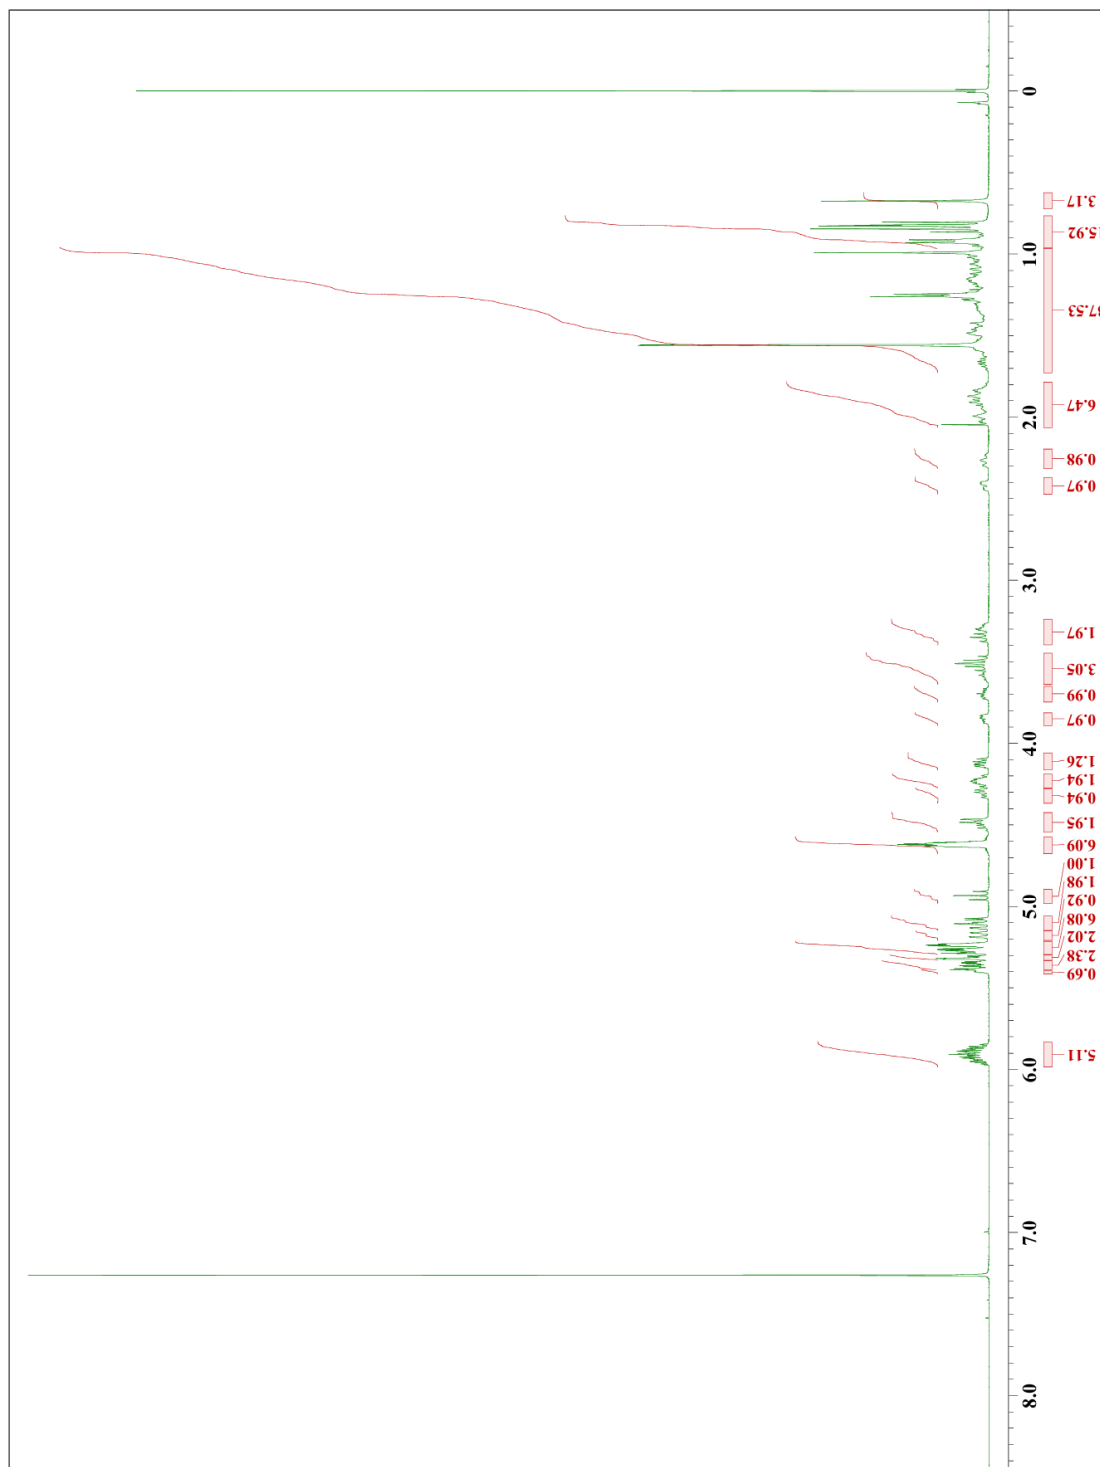

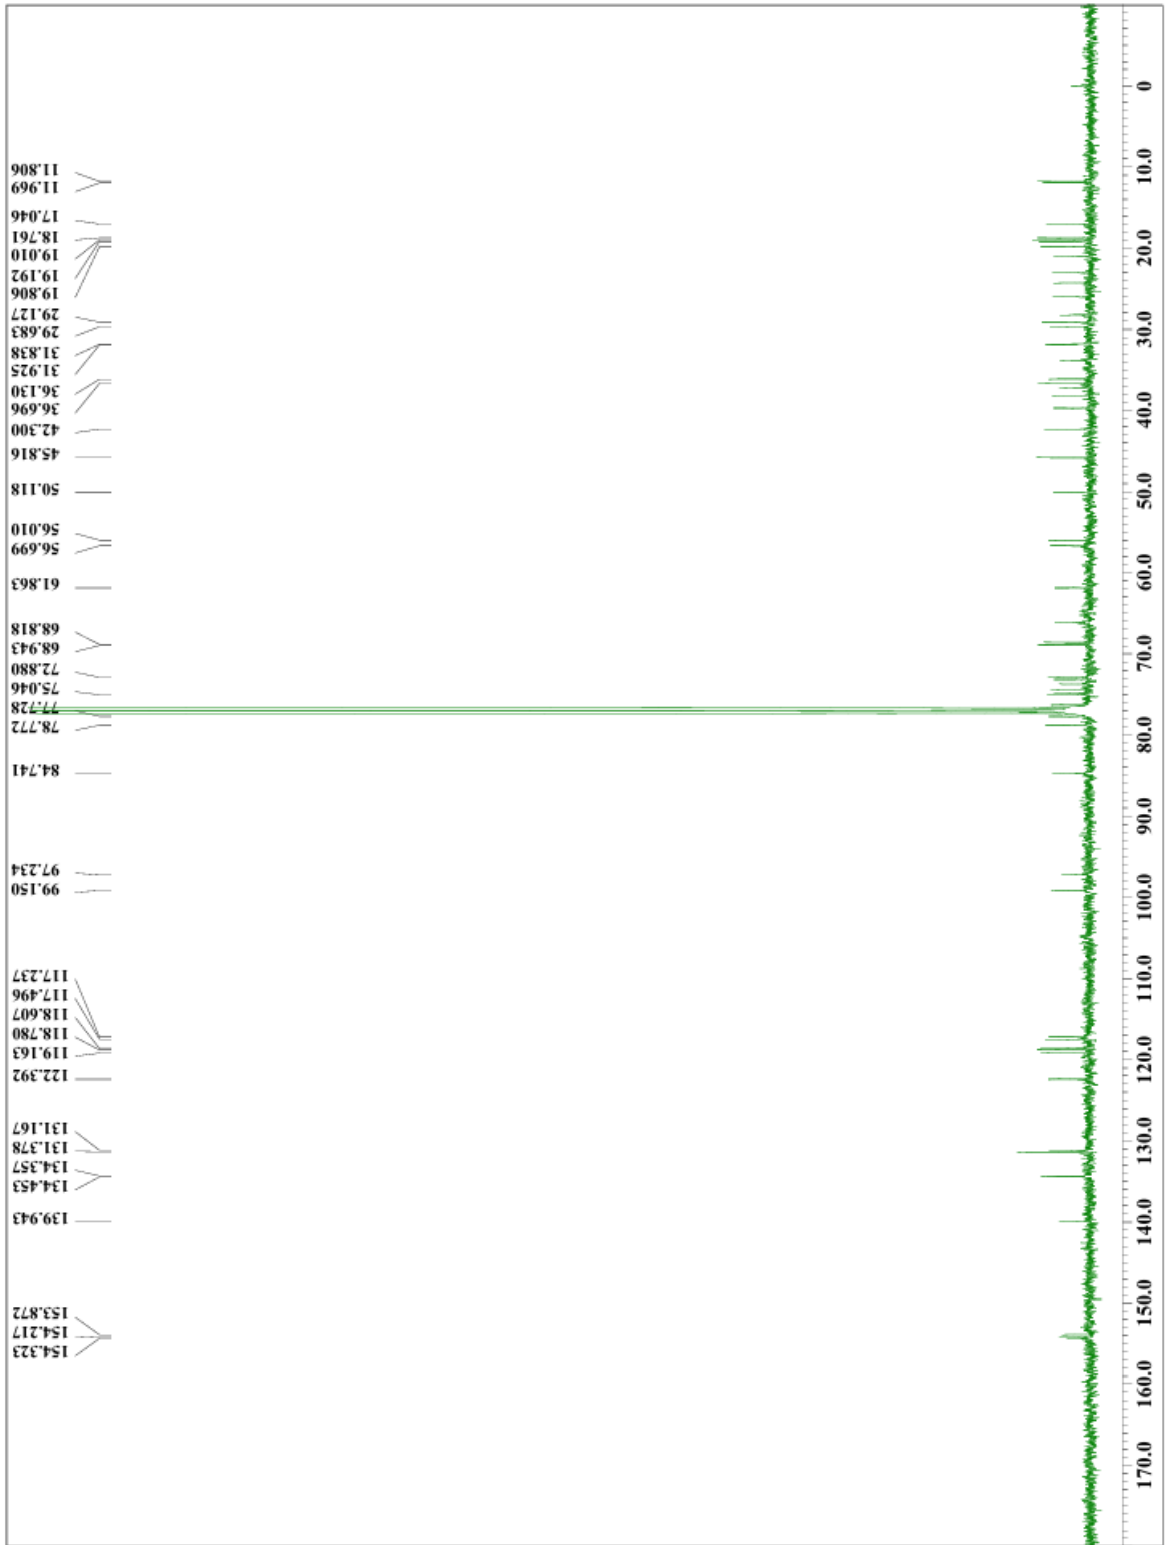

cholesteryl (2,3,4-*O*-trialloc- $\alpha$ -L-rhamnopyranosyl)-(1 $\rightarrow$ 2)-3,4-*O*-diallyl- $\beta$ -D-glucopyranoside

(7c)

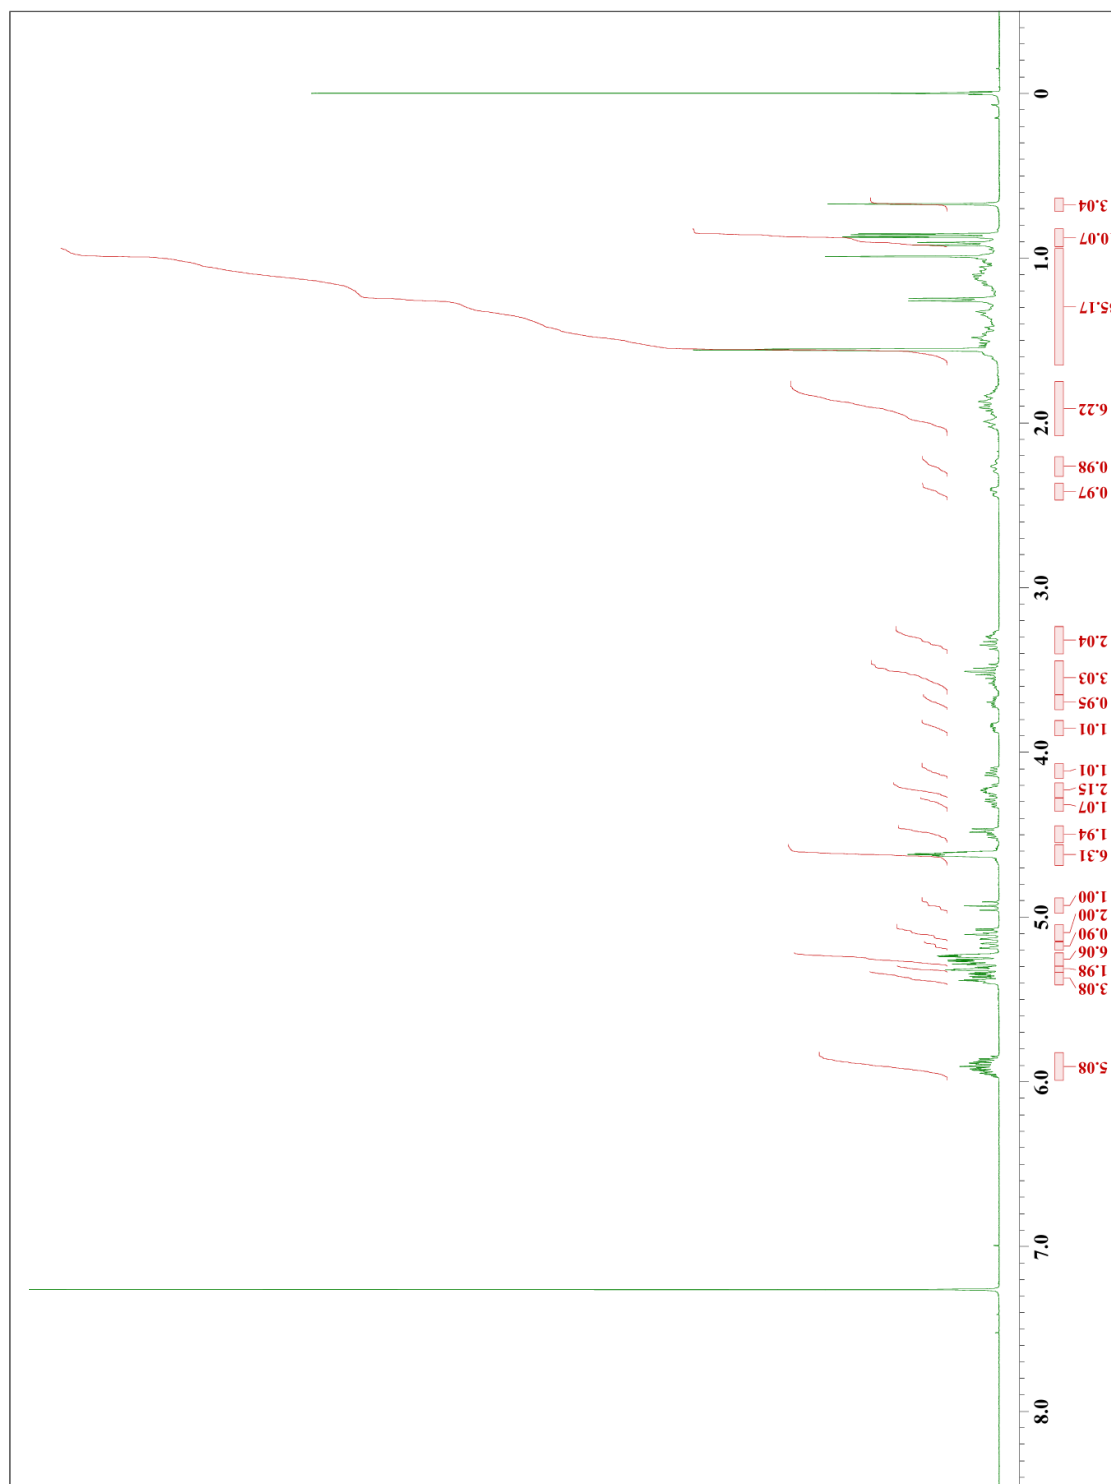

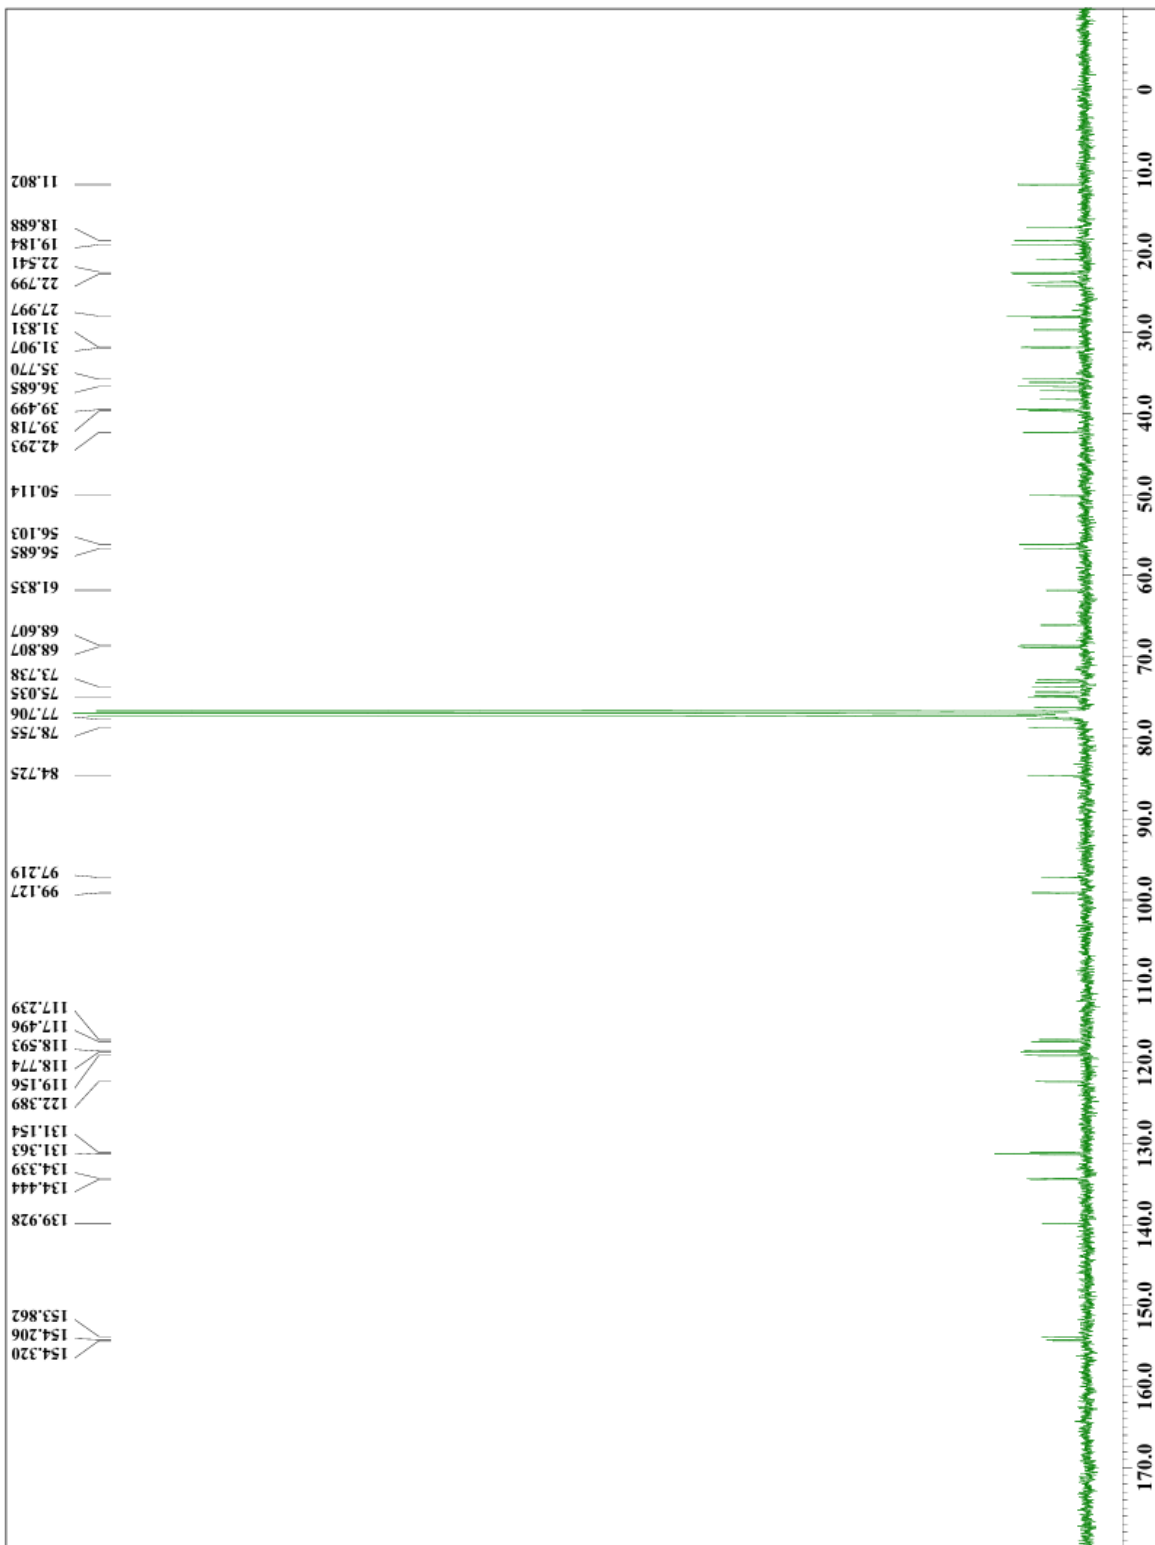

decahydro-2-naphthol (2,3,4-*O*-trialloc- $\alpha$ -L-rhamnopyranosyl)-(1 $\rightarrow$ 2)-3,4-*O*-diallyl- $\beta$ -D-glucopyranoside (7d)

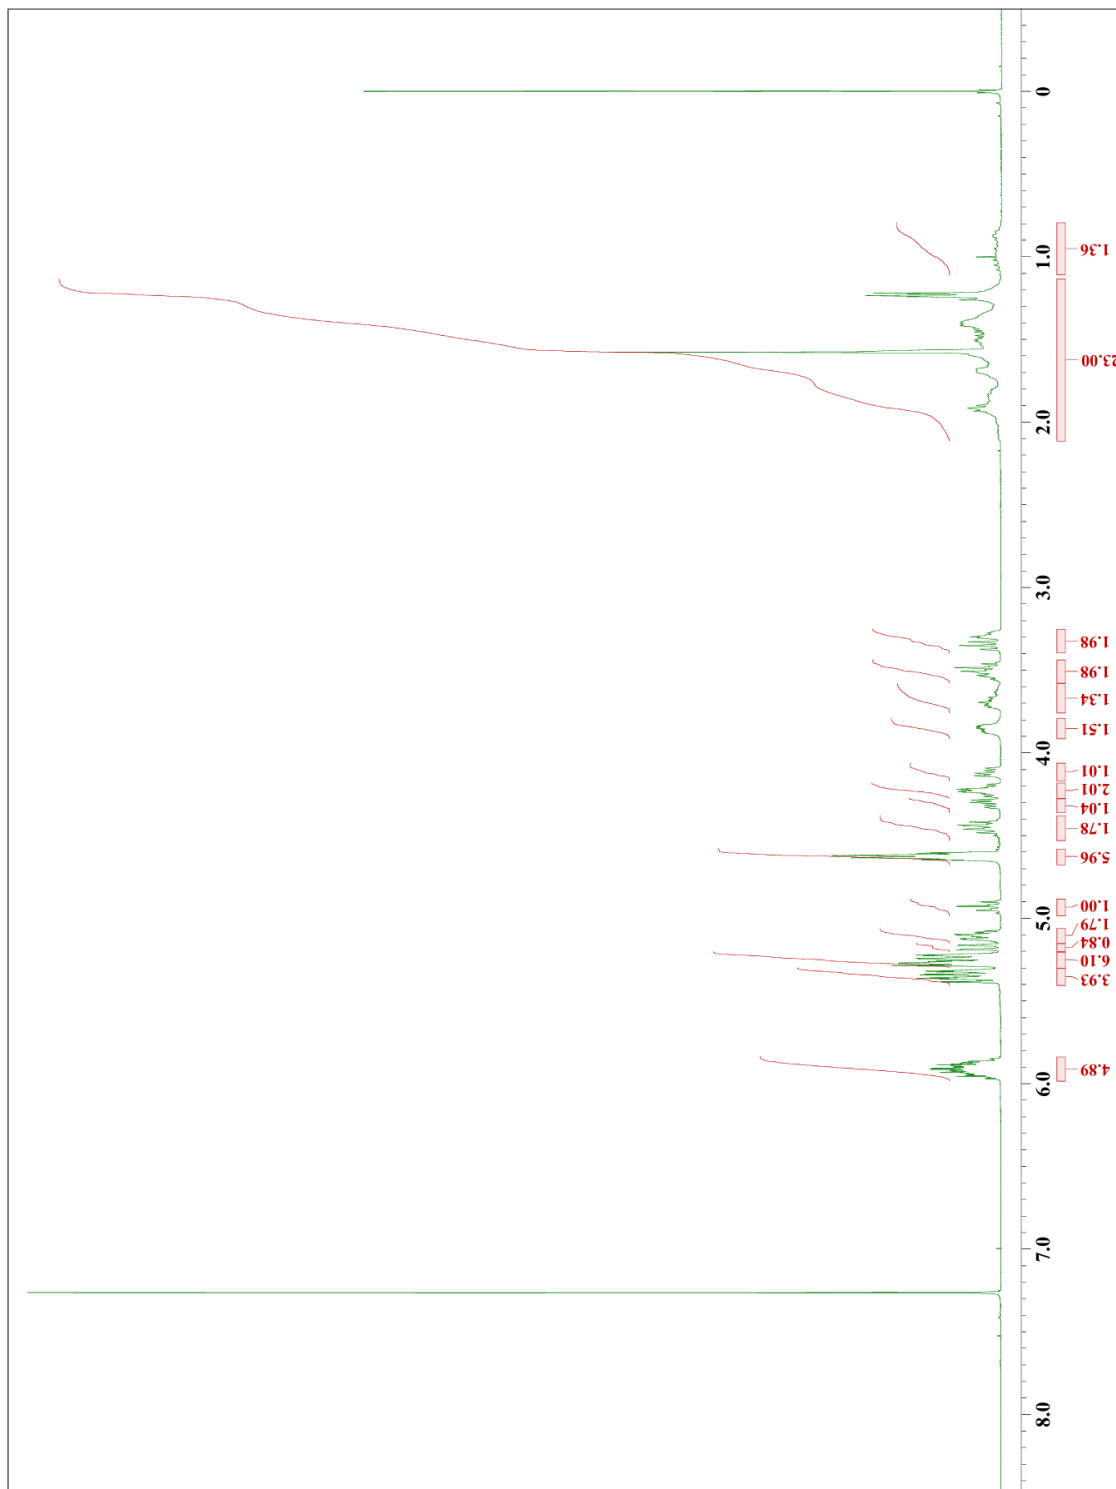

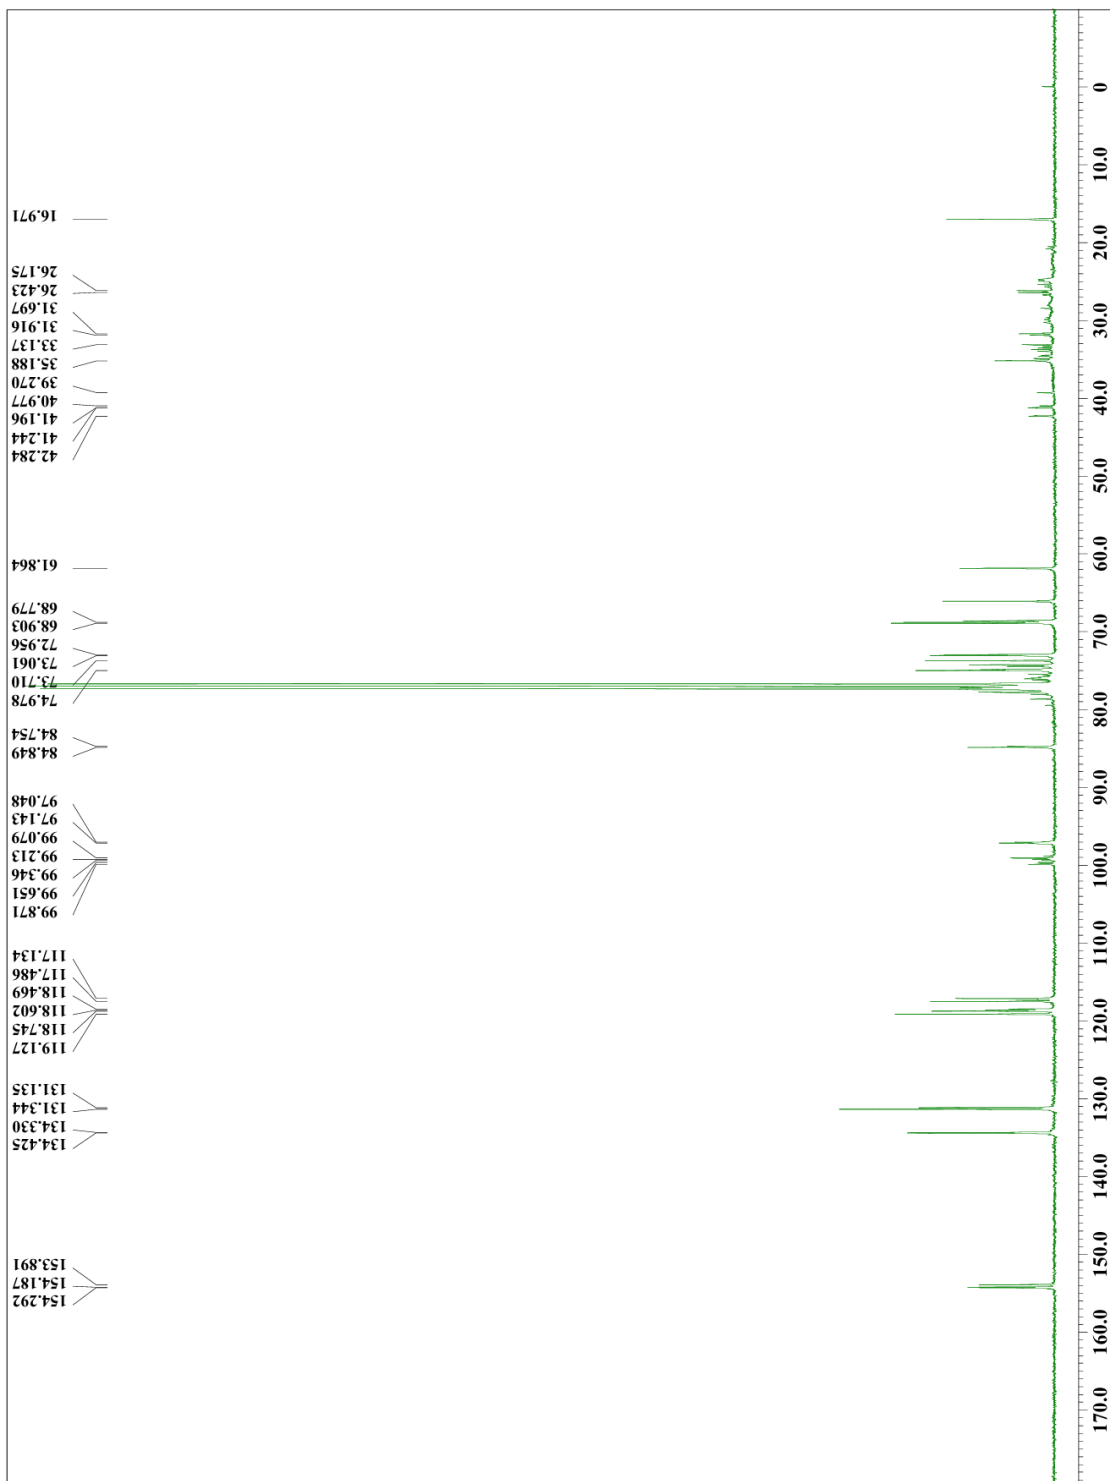

**methyl (2,3,4-*O*-trialloc- $\alpha$ -L-rhamnopyranosyl)-(1 $\rightarrow$ 2)-3,4-*O*-diallyl- $\beta$ -D-glucopyranoside (7e)**

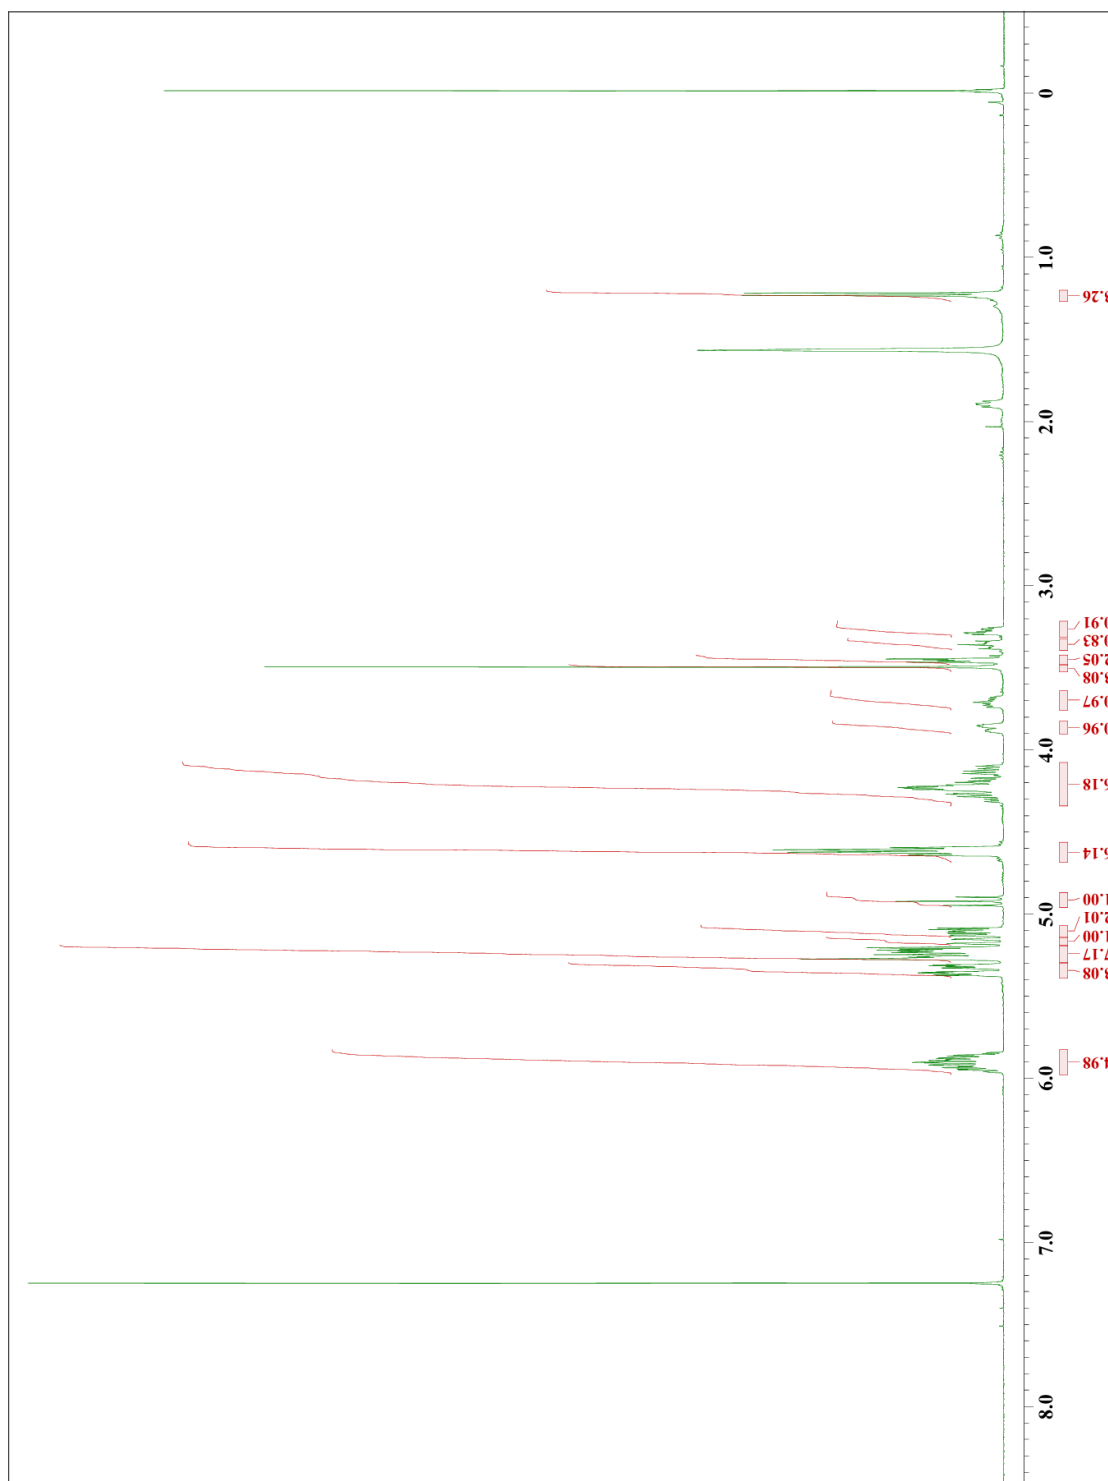

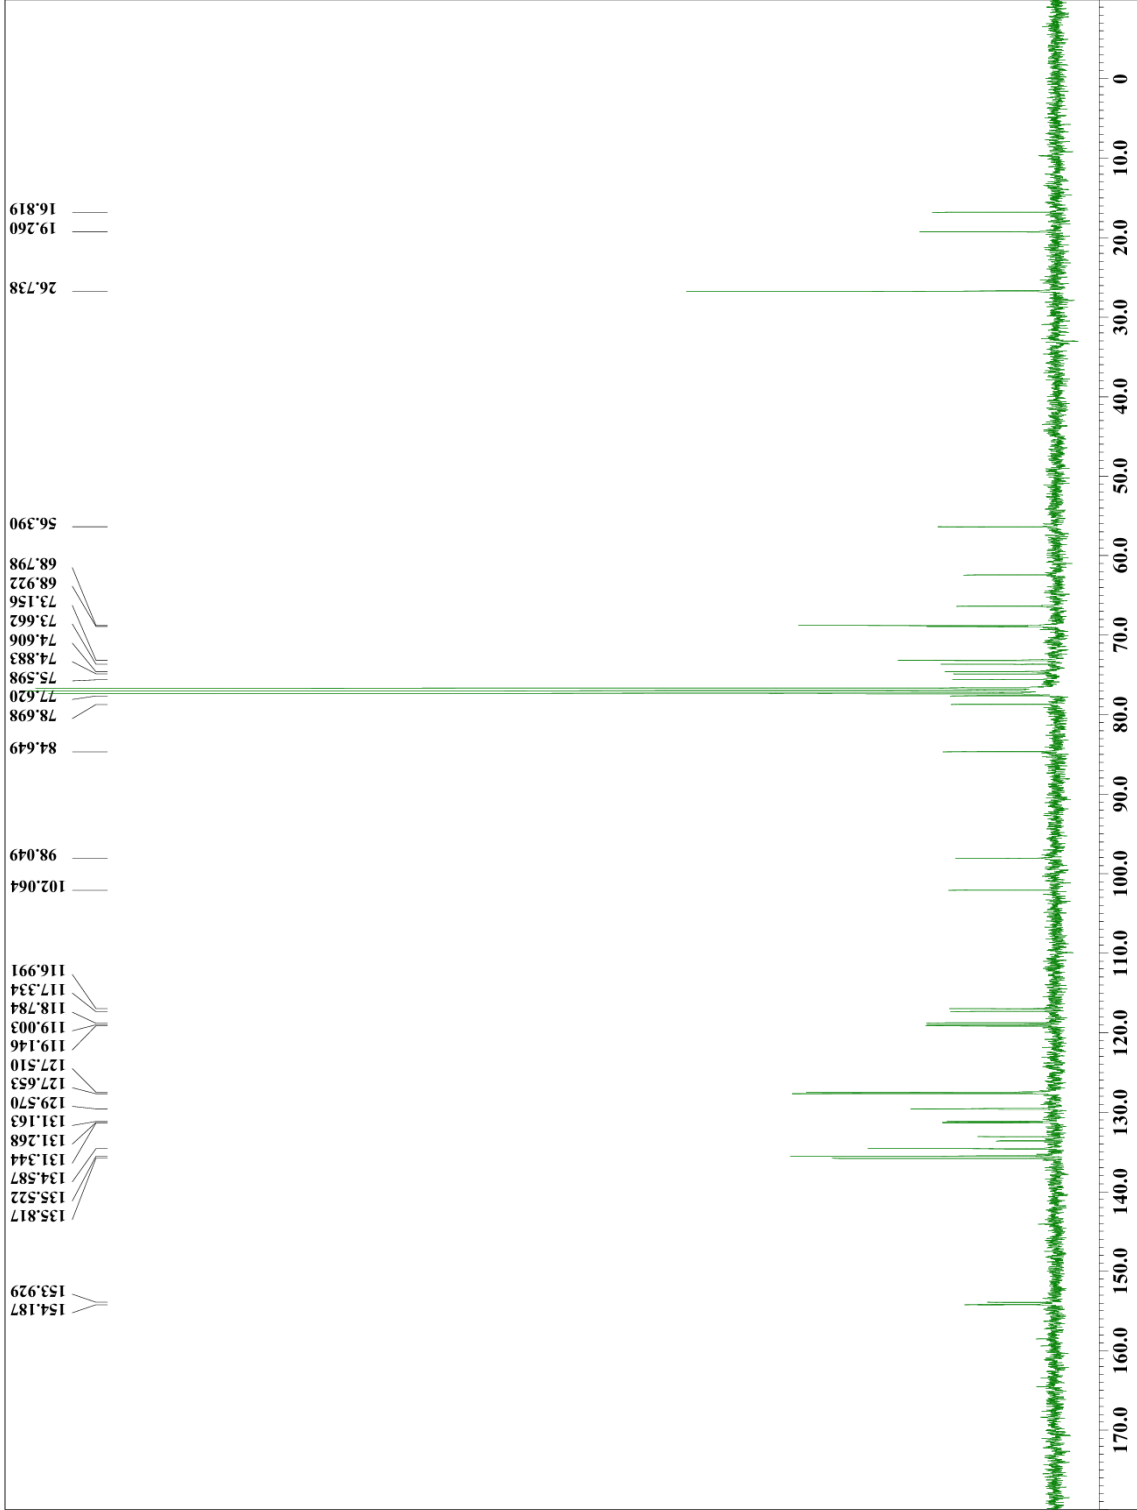

diosgenyl  $\alpha$ -L-rhamnopyranosyl-(1 $\rightarrow$ 2)-6-*O*-palmitoyl- $\beta$ -D-glucopyranoside (1a)

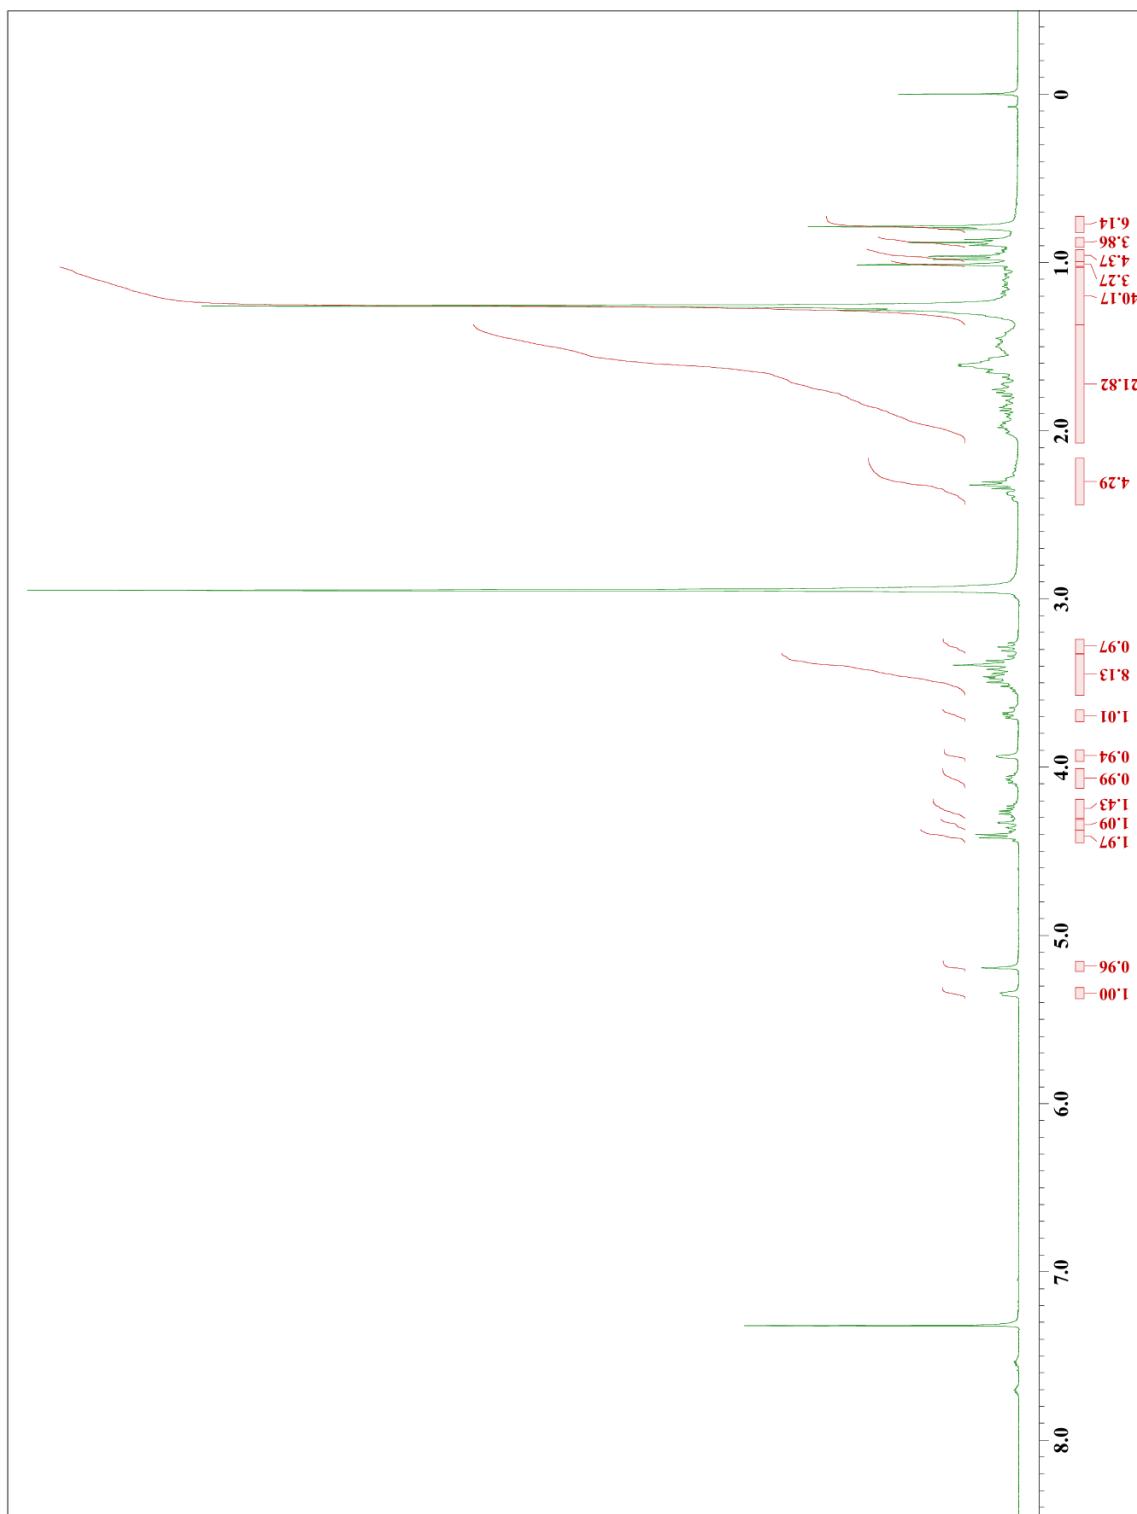

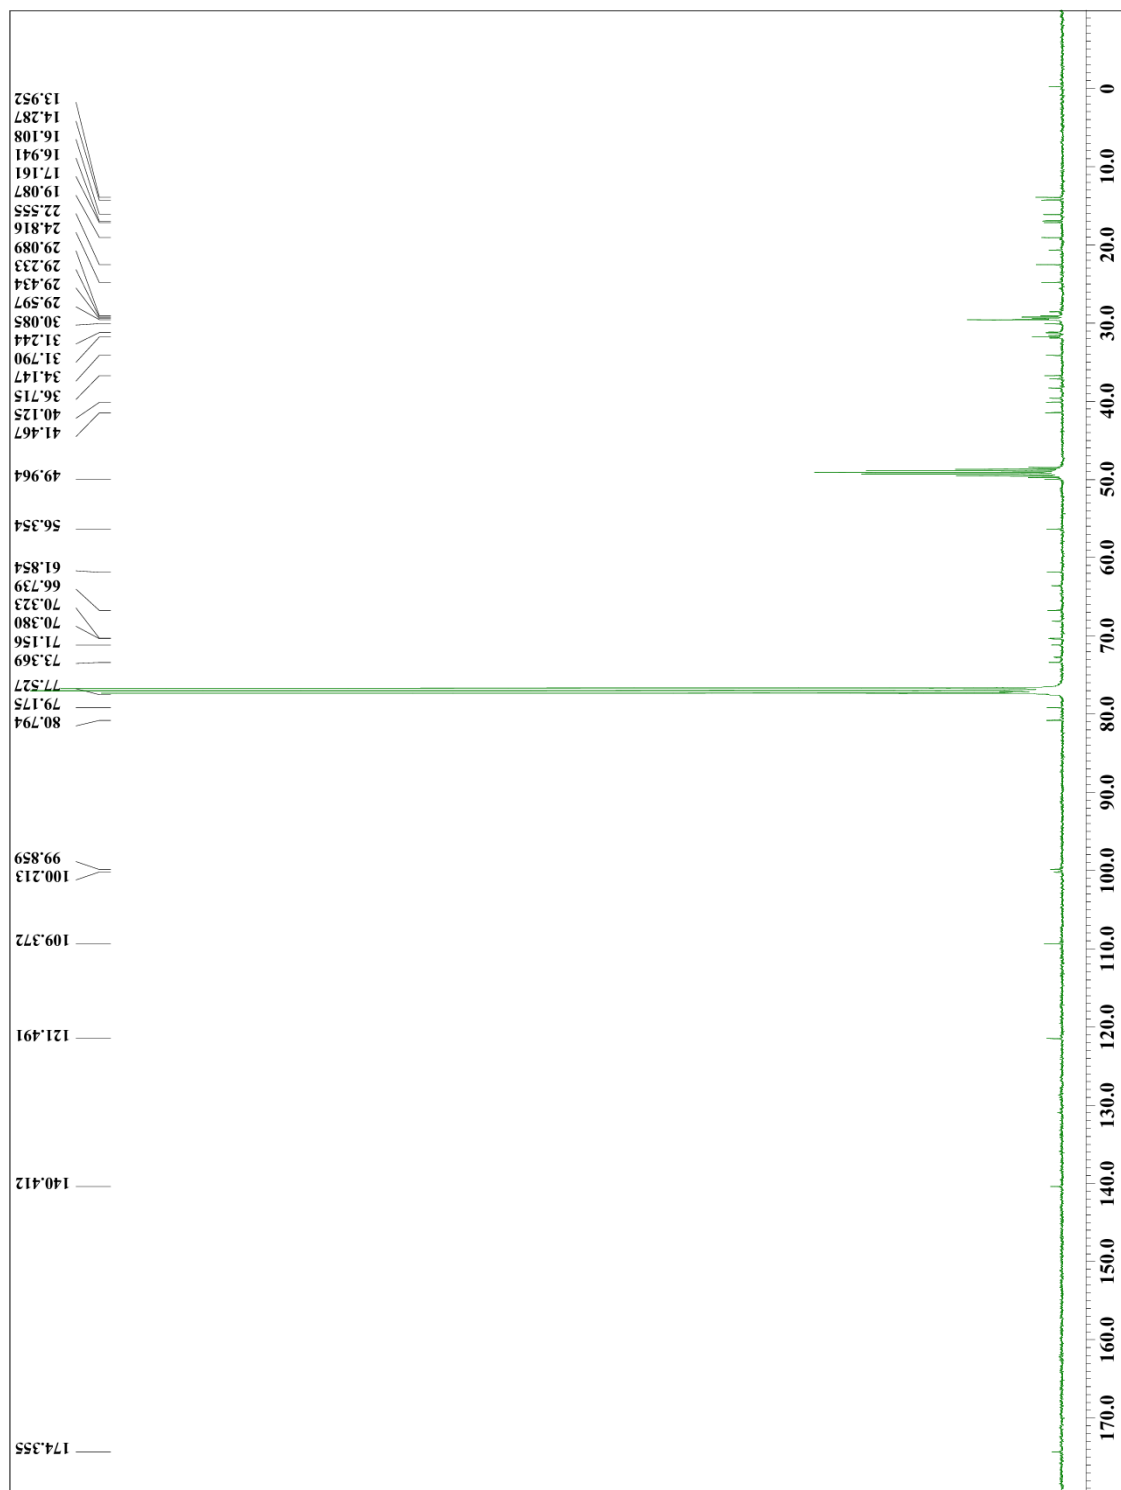

**$\beta$ -sitosteryl  $\alpha$ -L-rhamnopyranosyl-(1 $\rightarrow$ 2)-6-O-palmitoyl- $\beta$ -D-glucopyranoside (1b)**

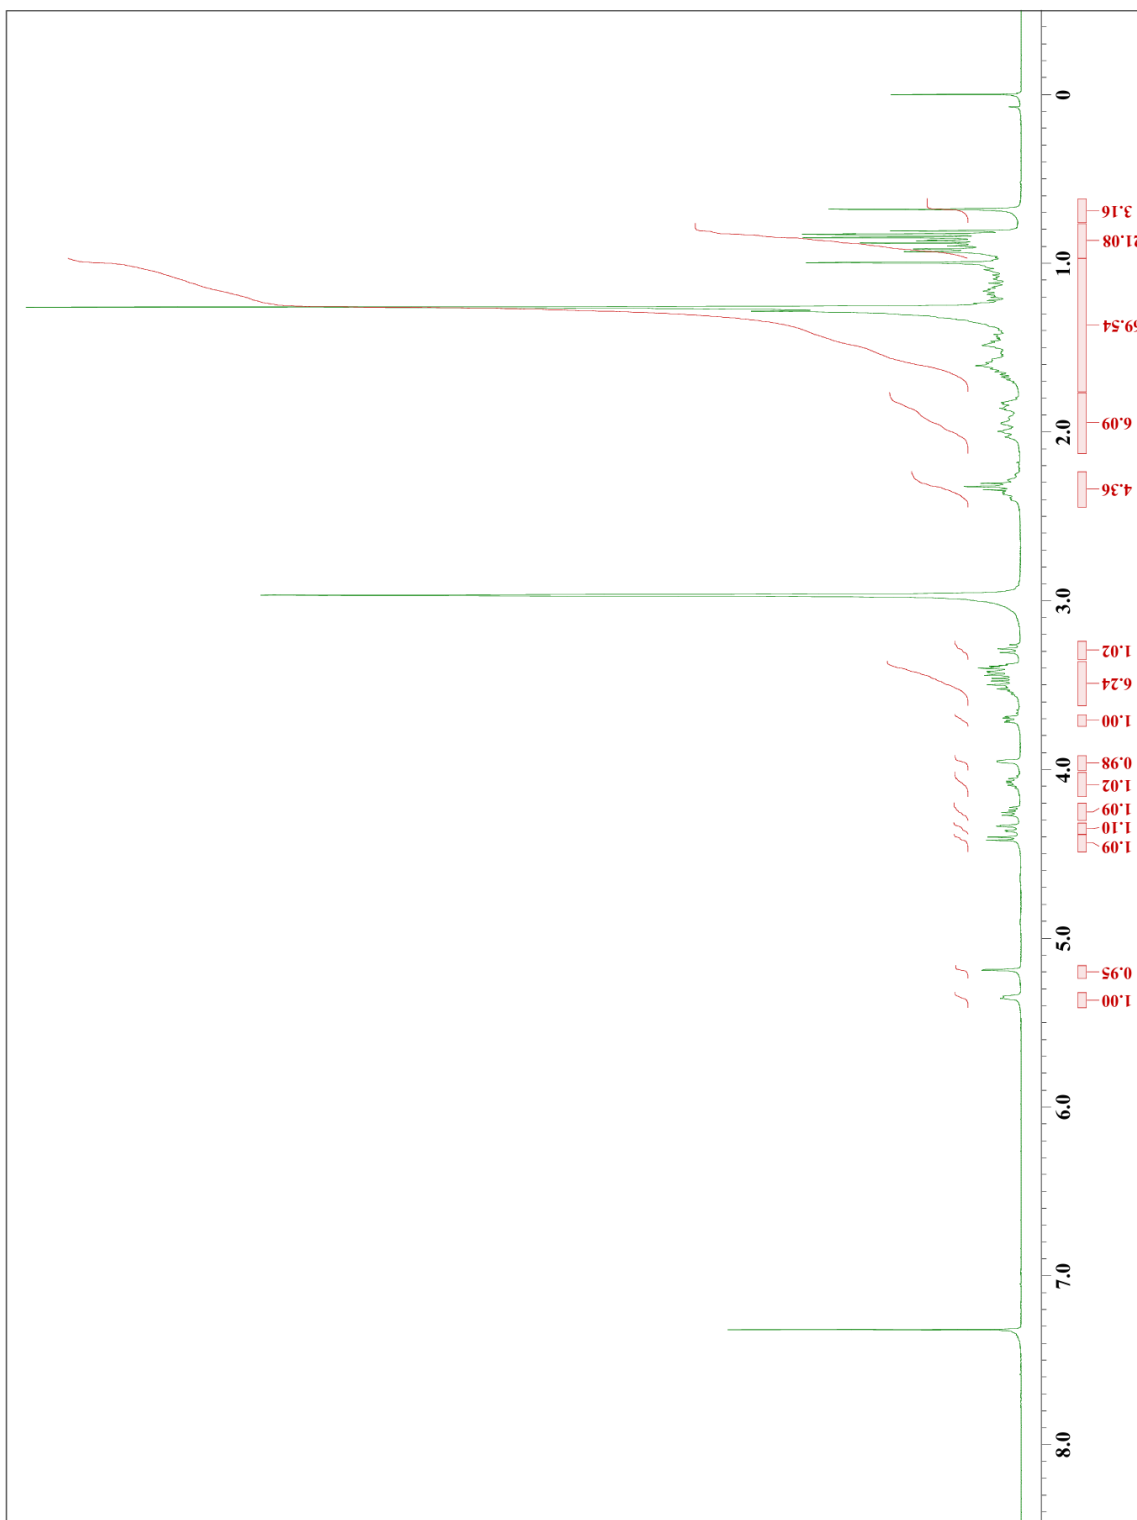

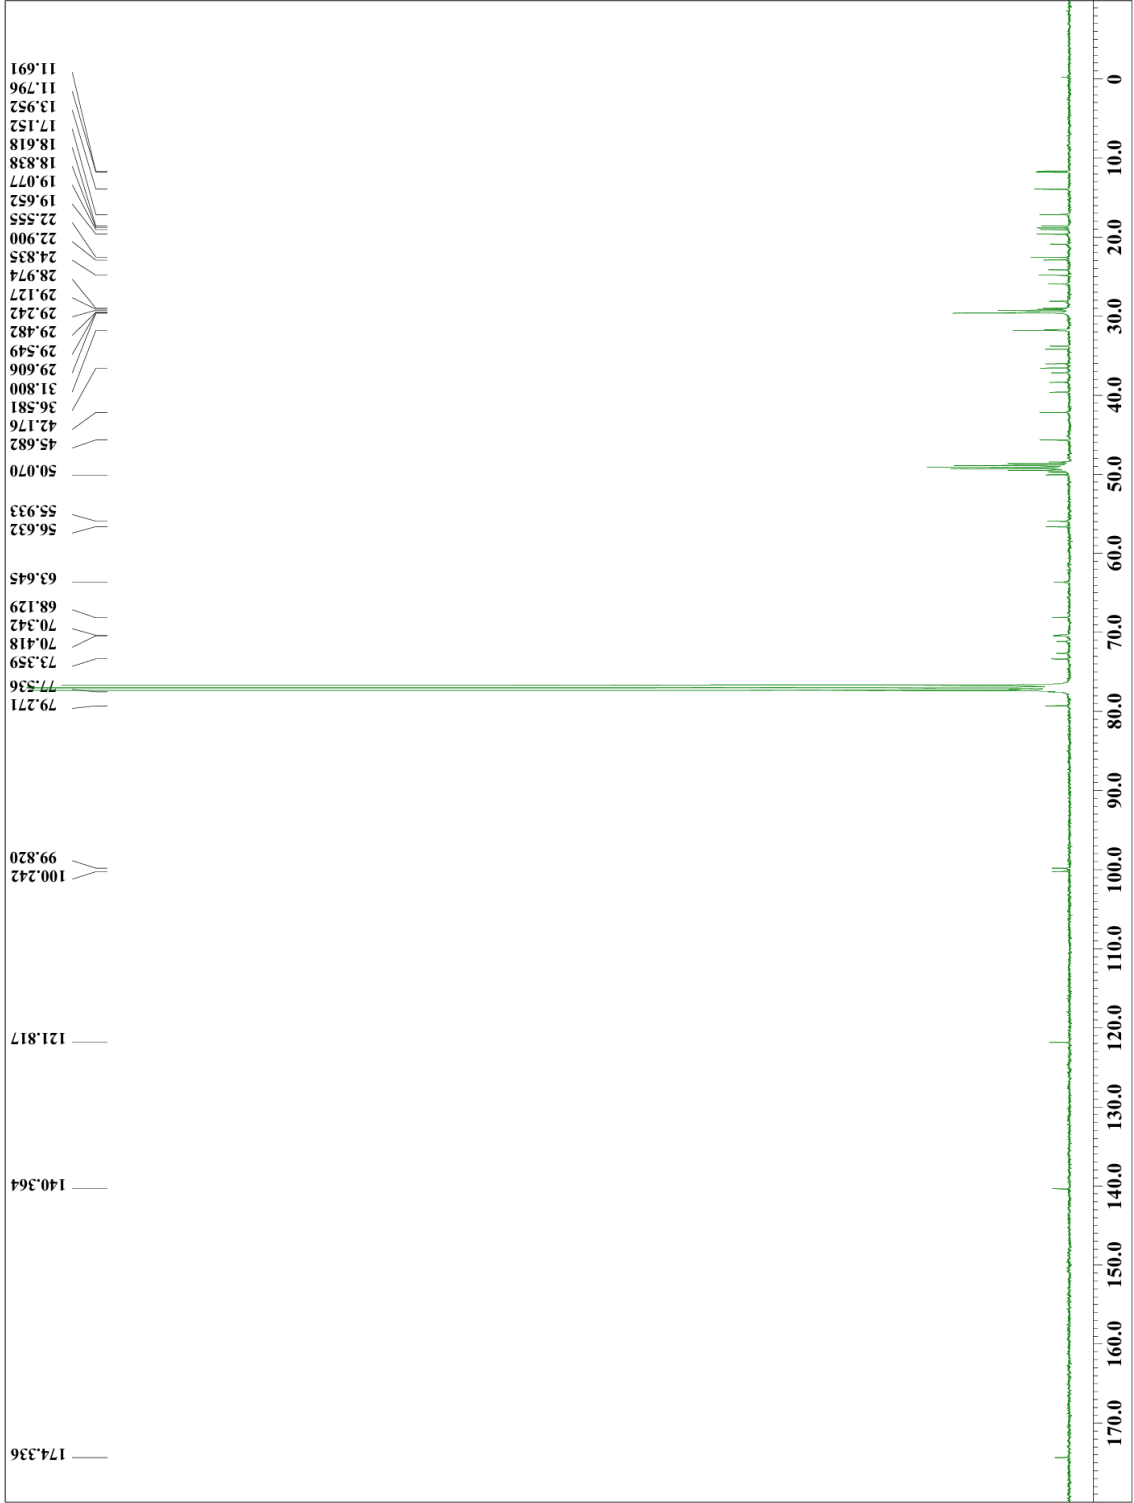

cholesteryl  $\alpha$ -L-rhamnopyranosyl-(1 $\rightarrow$ 2)-6-O-palmitoyl- $\beta$ -D-glucopyranoside (1c)

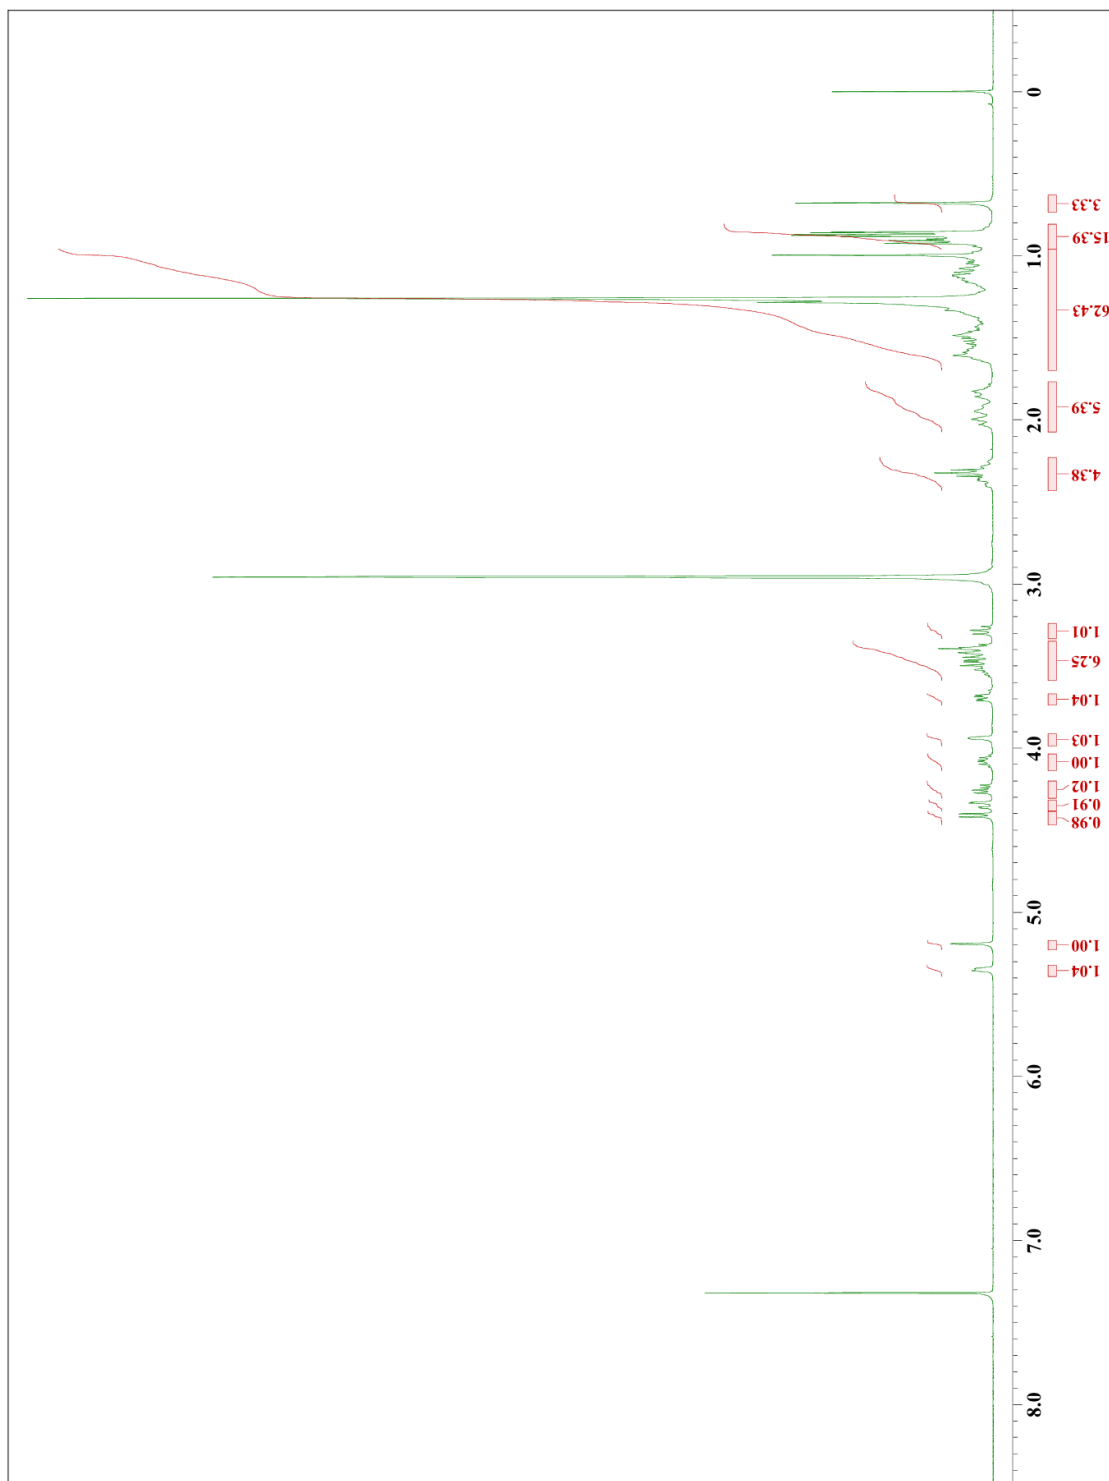

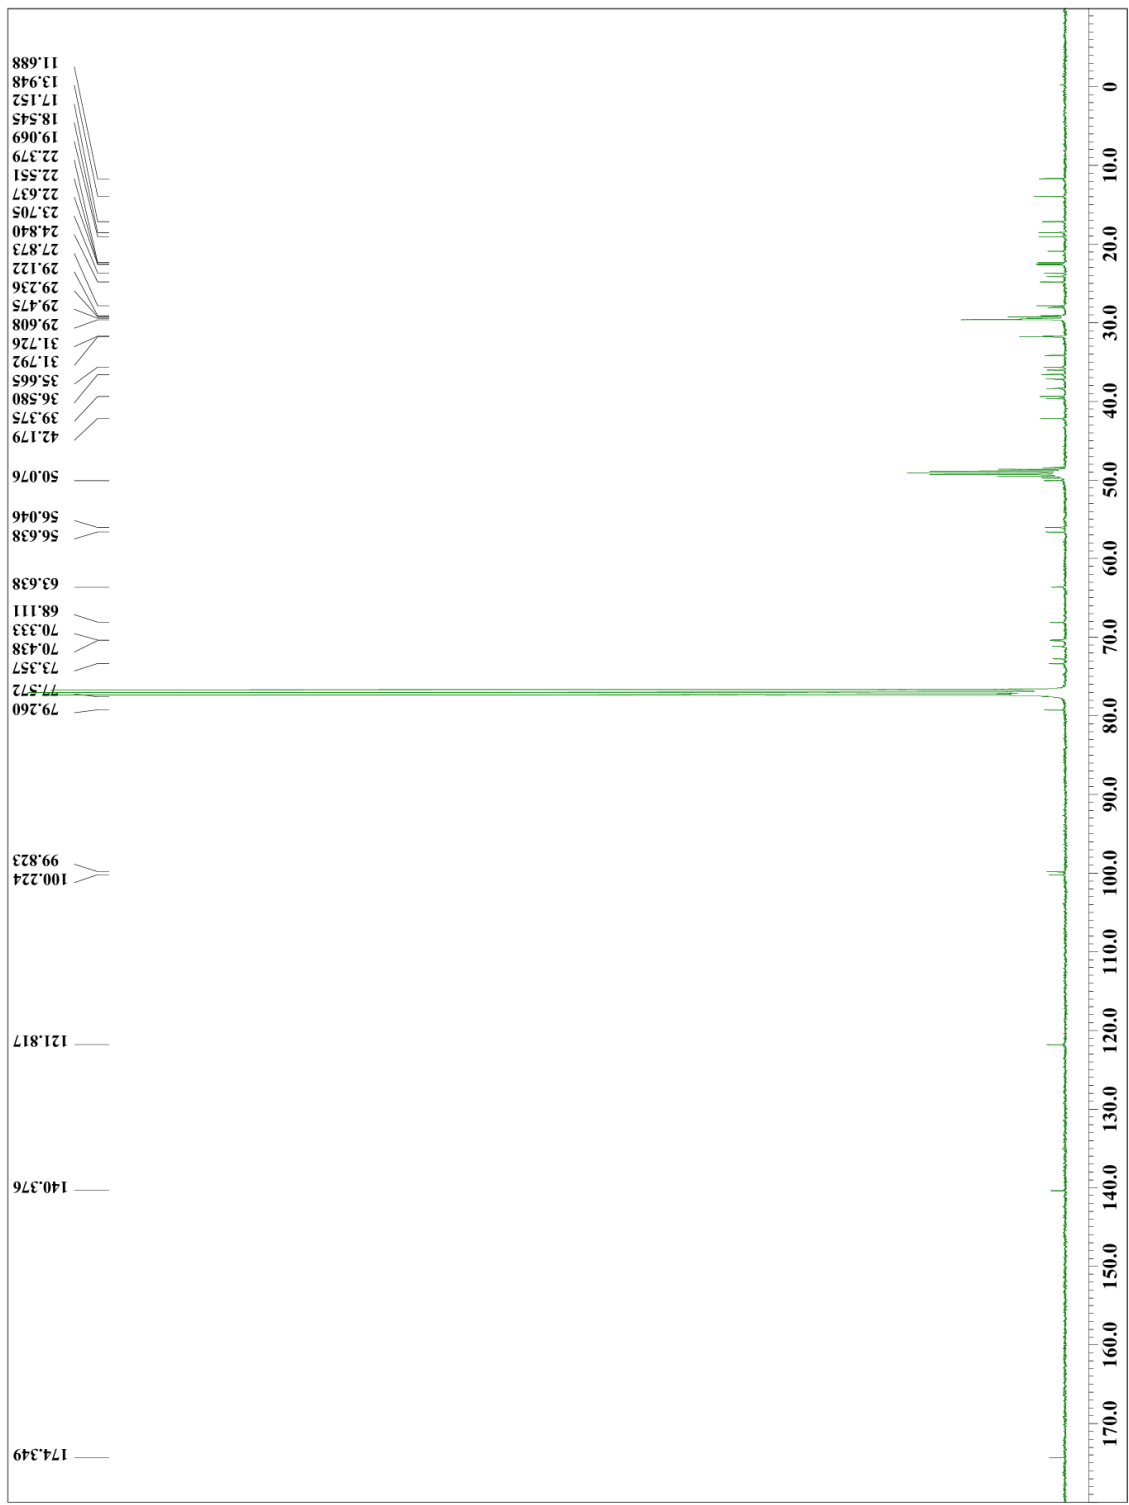

decahydro-2-naphthol  $\alpha$ -L-rhamnopyranosyl-(1 $\rightarrow$ 2)-6-O-palmitoyl- $\beta$ -D-glucopyranoside (1d)

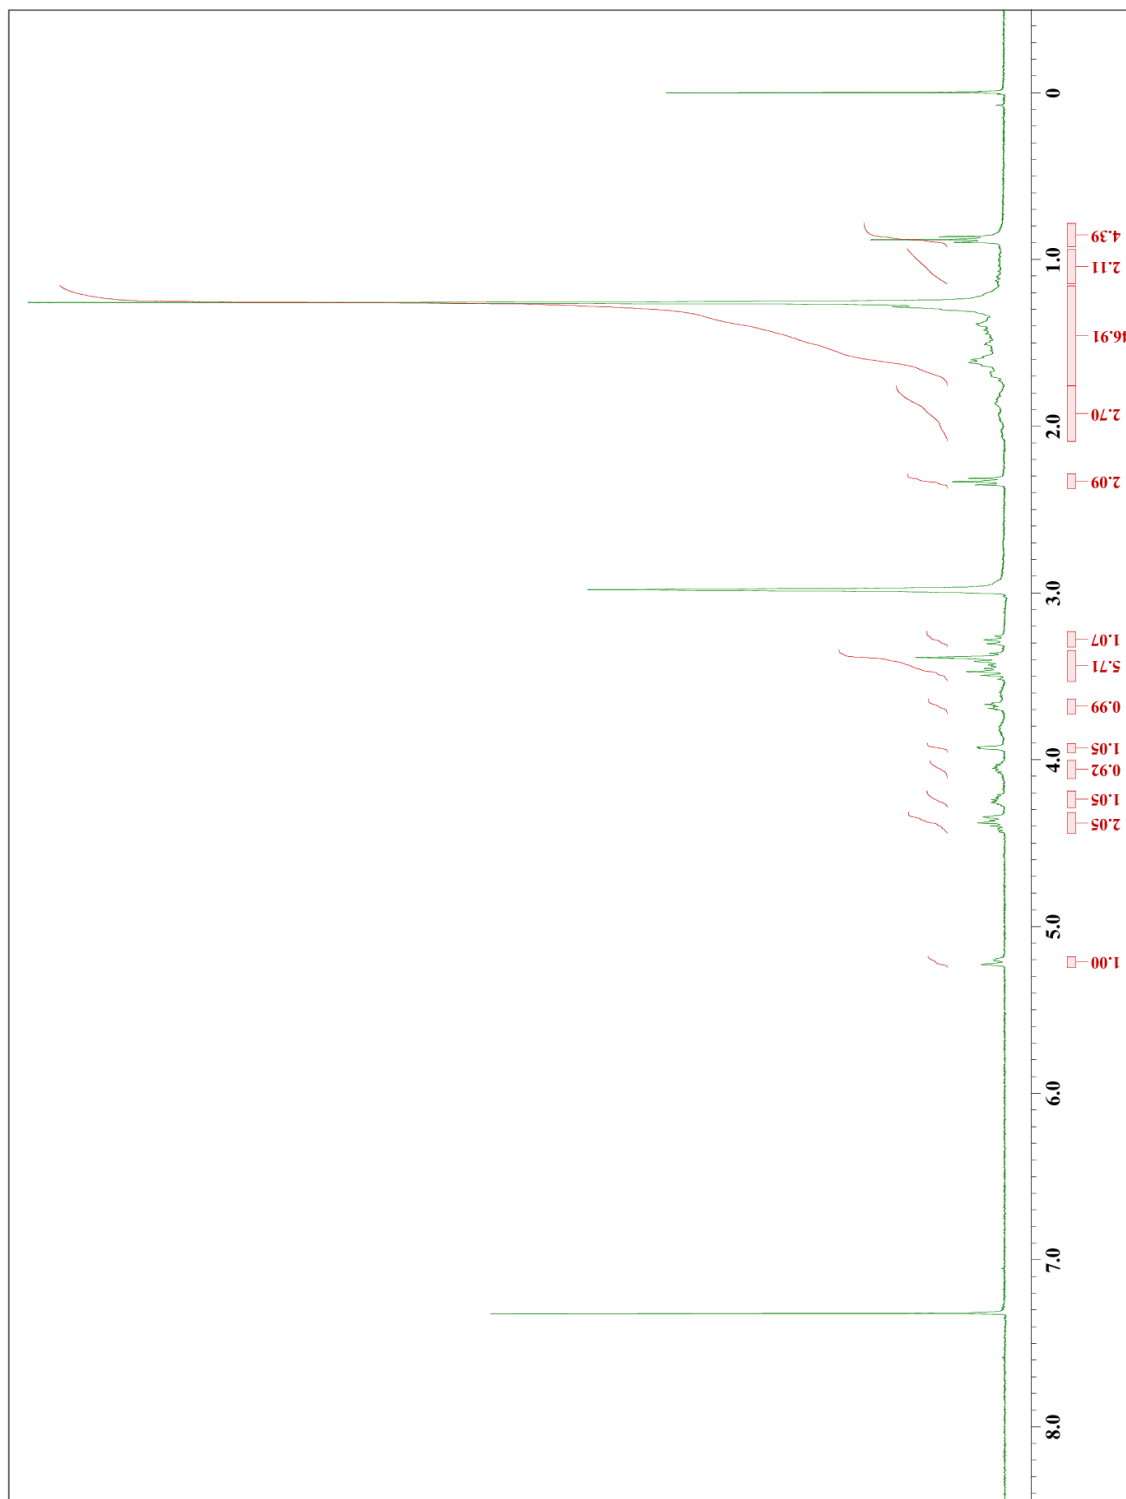

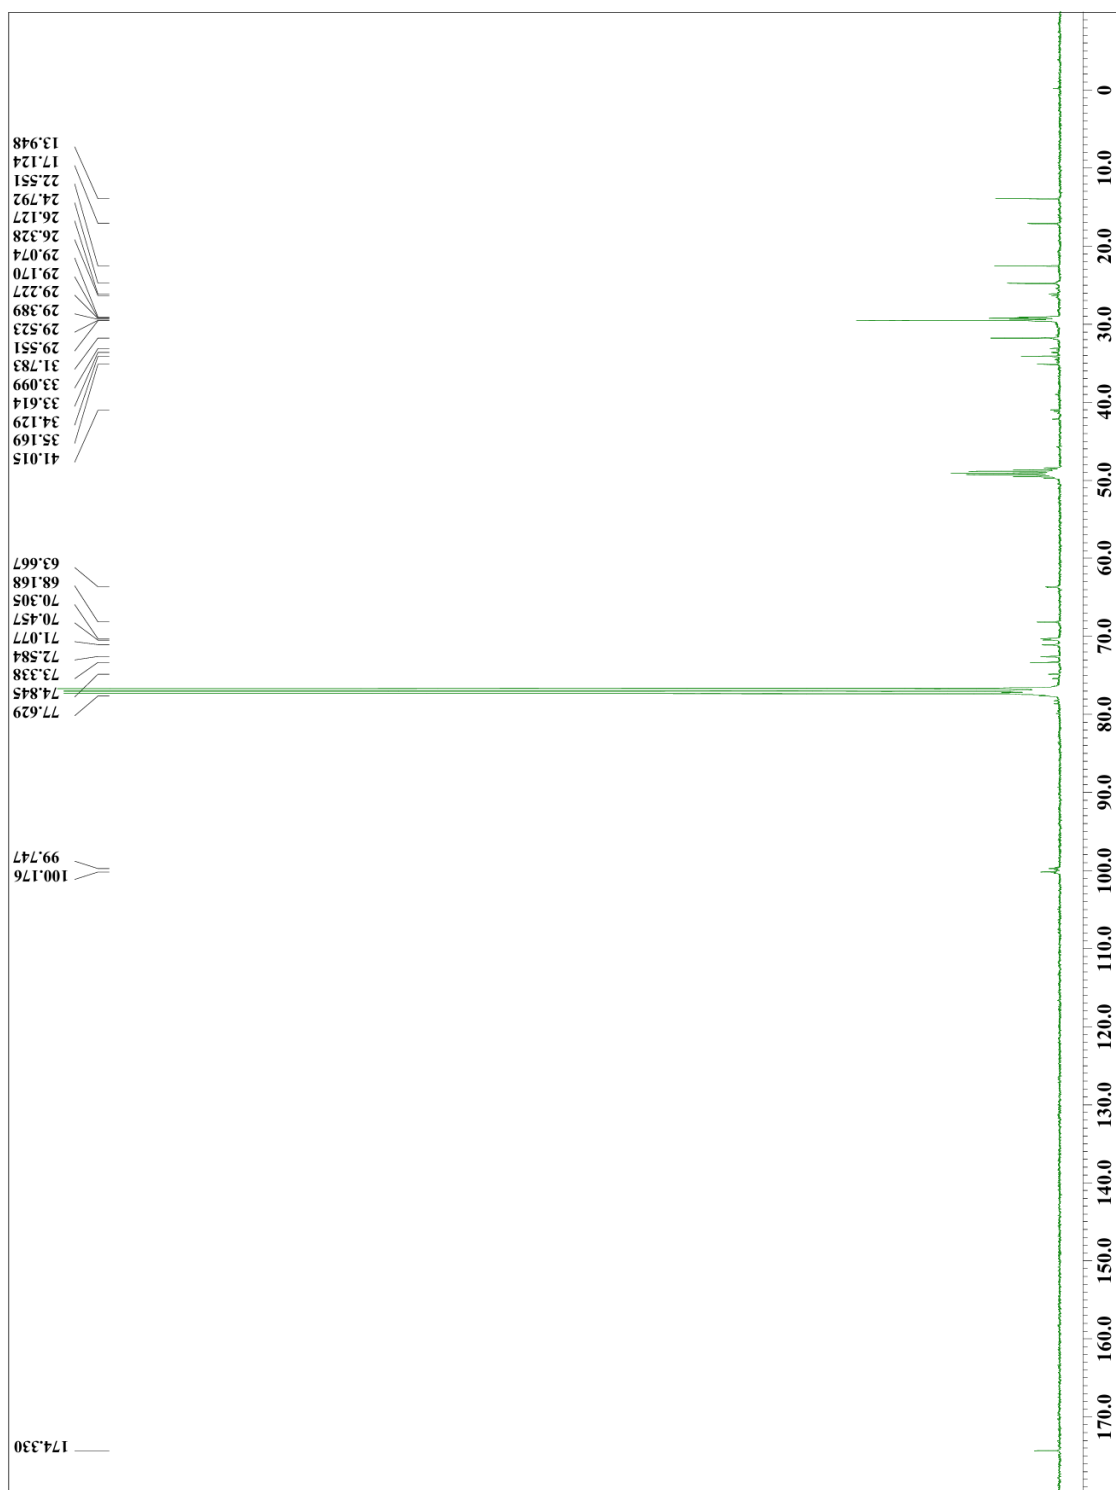

methyl  $\alpha$ -L-rhamnopyranosyl-(1 $\rightarrow$ 2)-6-*O*-palmitoyl- $\beta$ -D-glucopyranoside (1e)

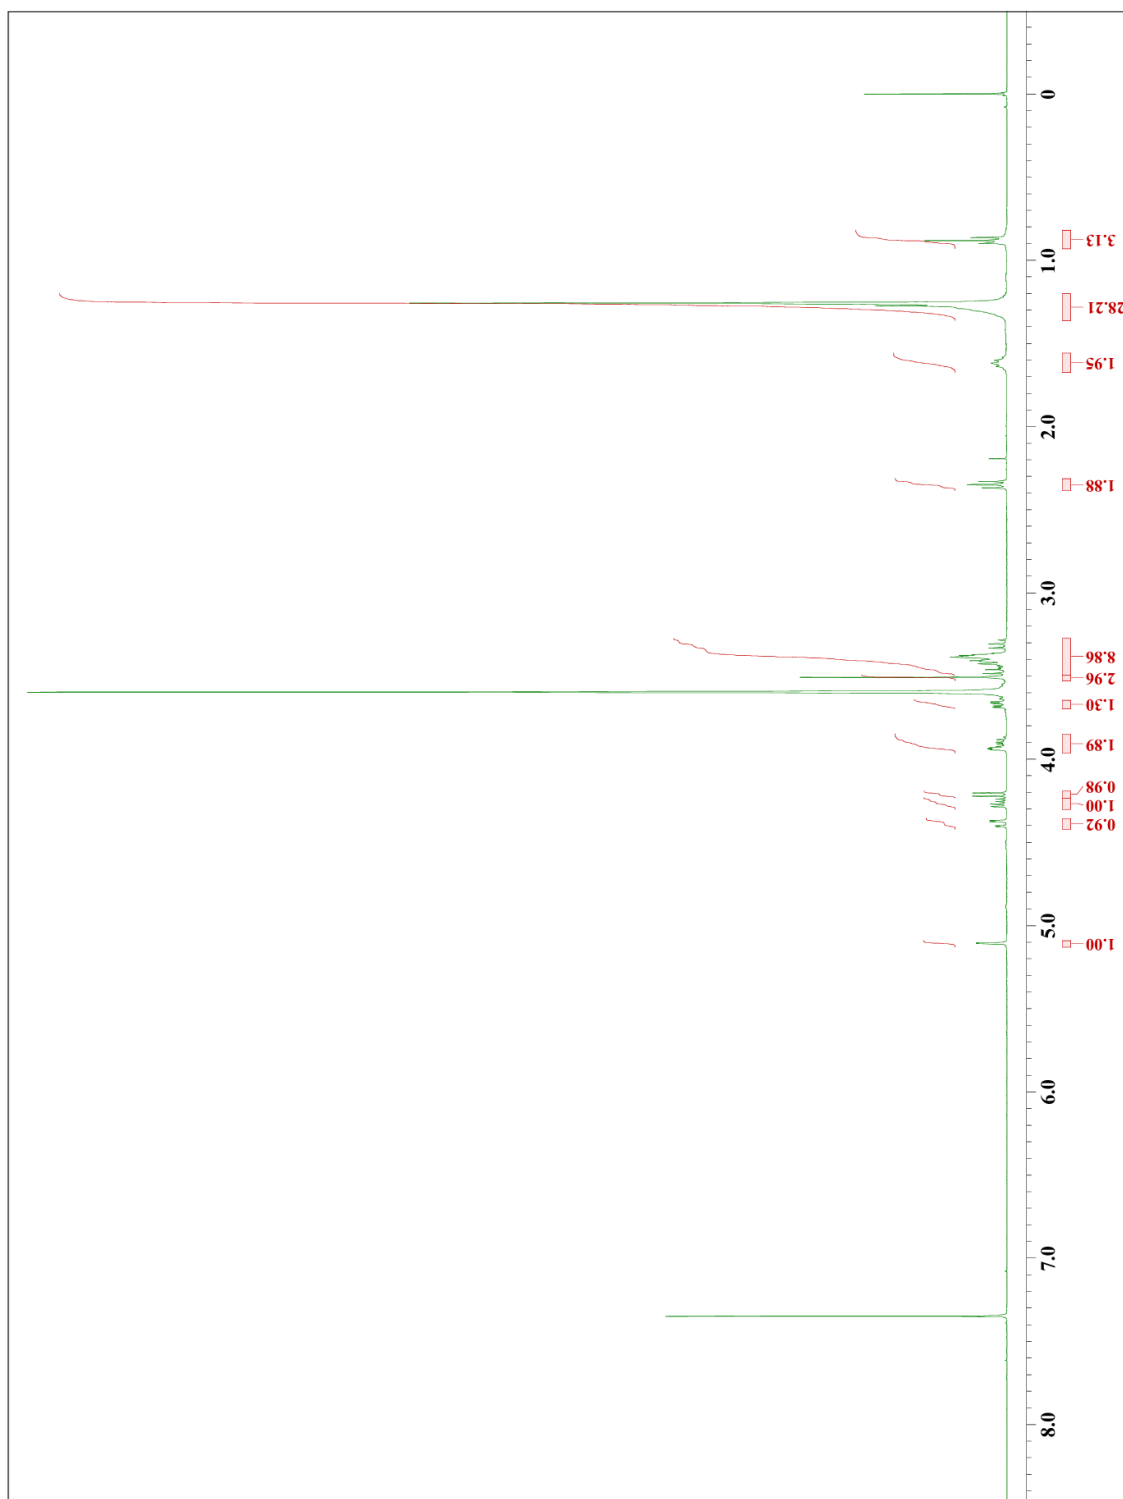

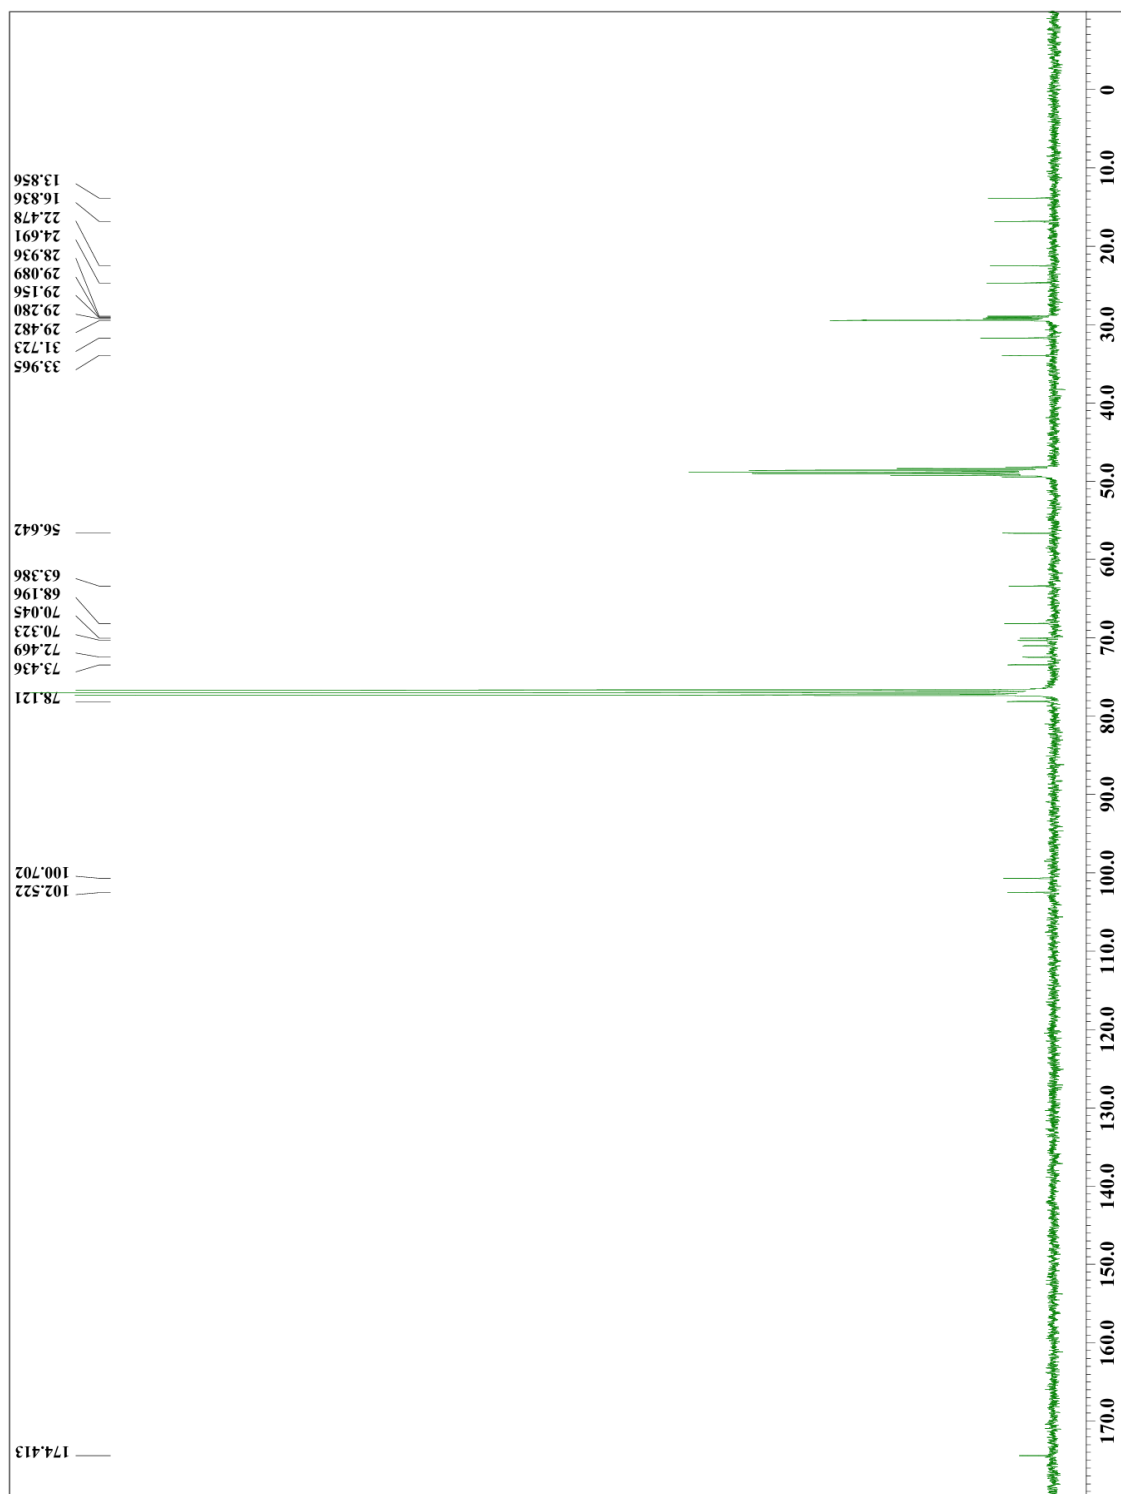

diosgenyl  $\alpha$ -L-rhamnopyranosyl-(1 $\rightarrow$ 2)- $\beta$ -D-glucopyranoside (1a')

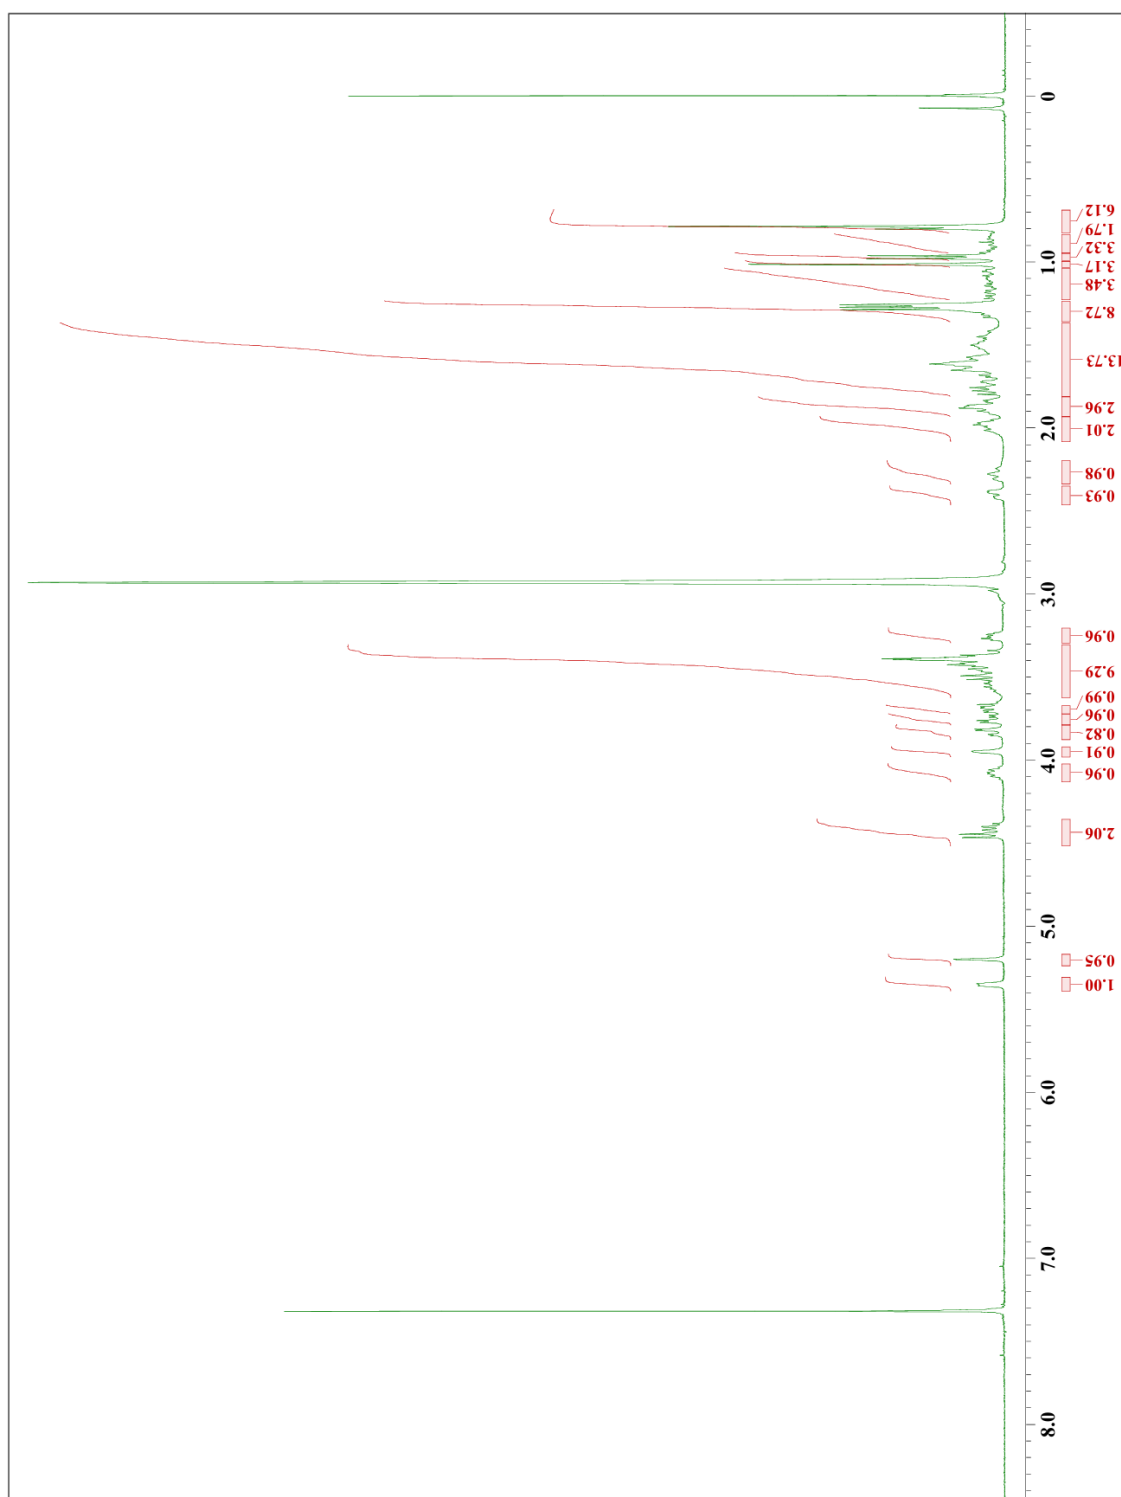

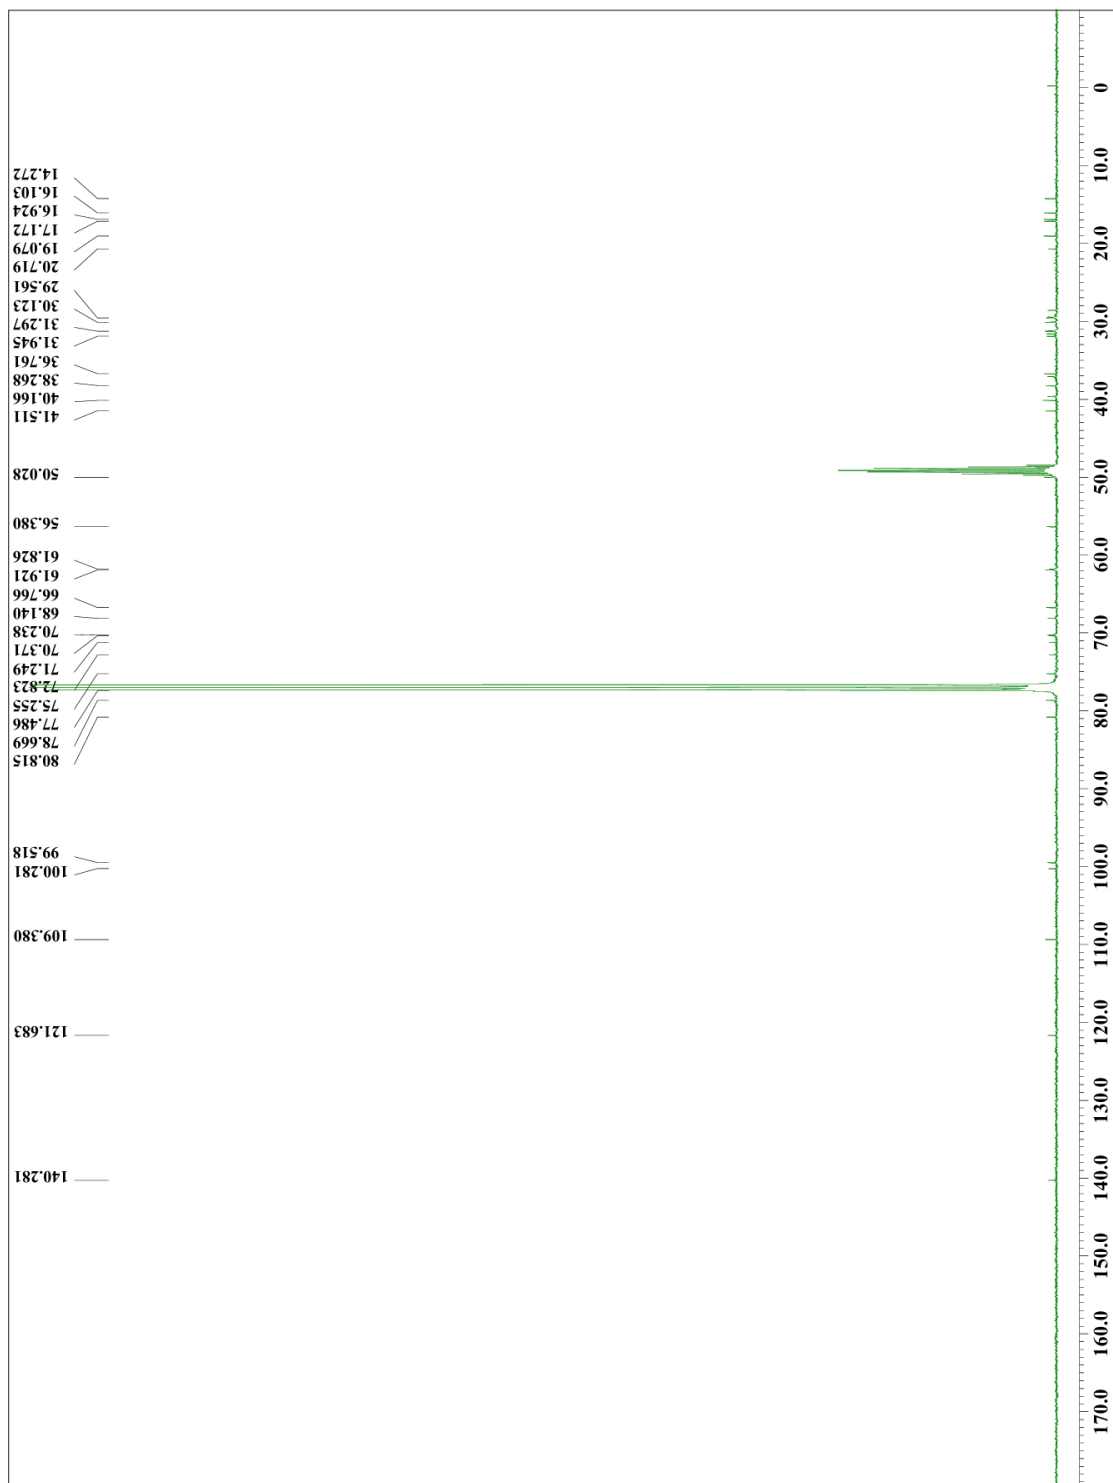

*p*-methoxyphenyl 2,3,4-*O*-trialloc-L-rhamnopyranoside (S2)

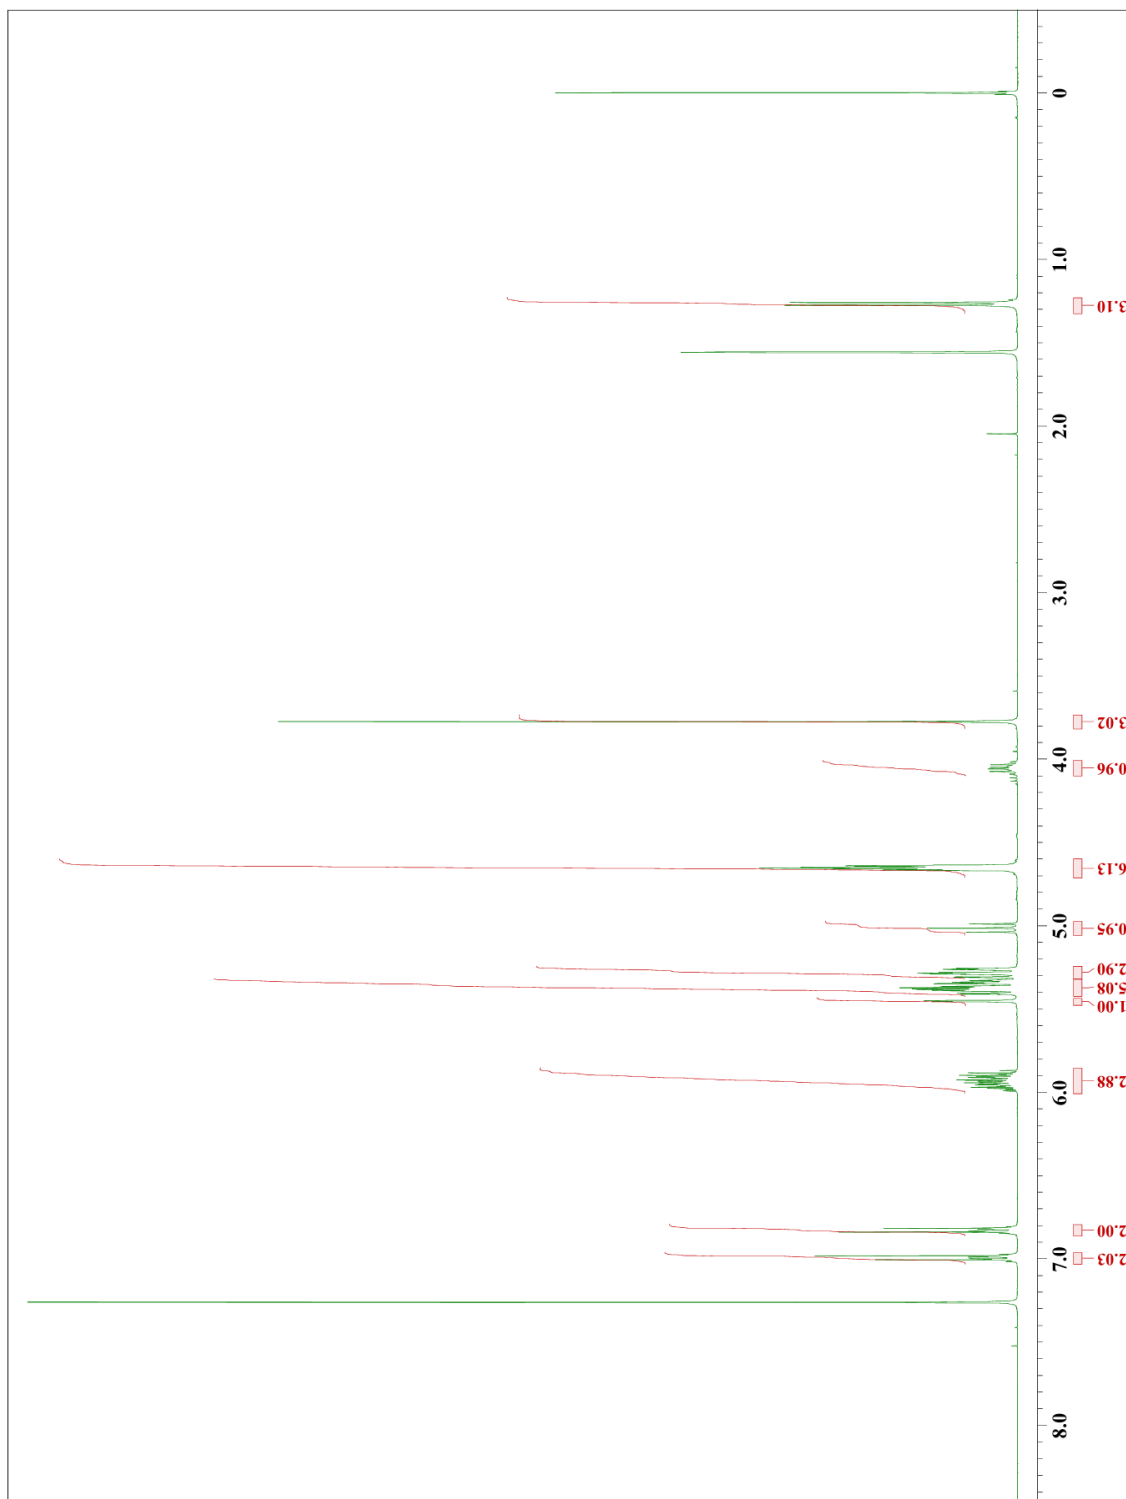

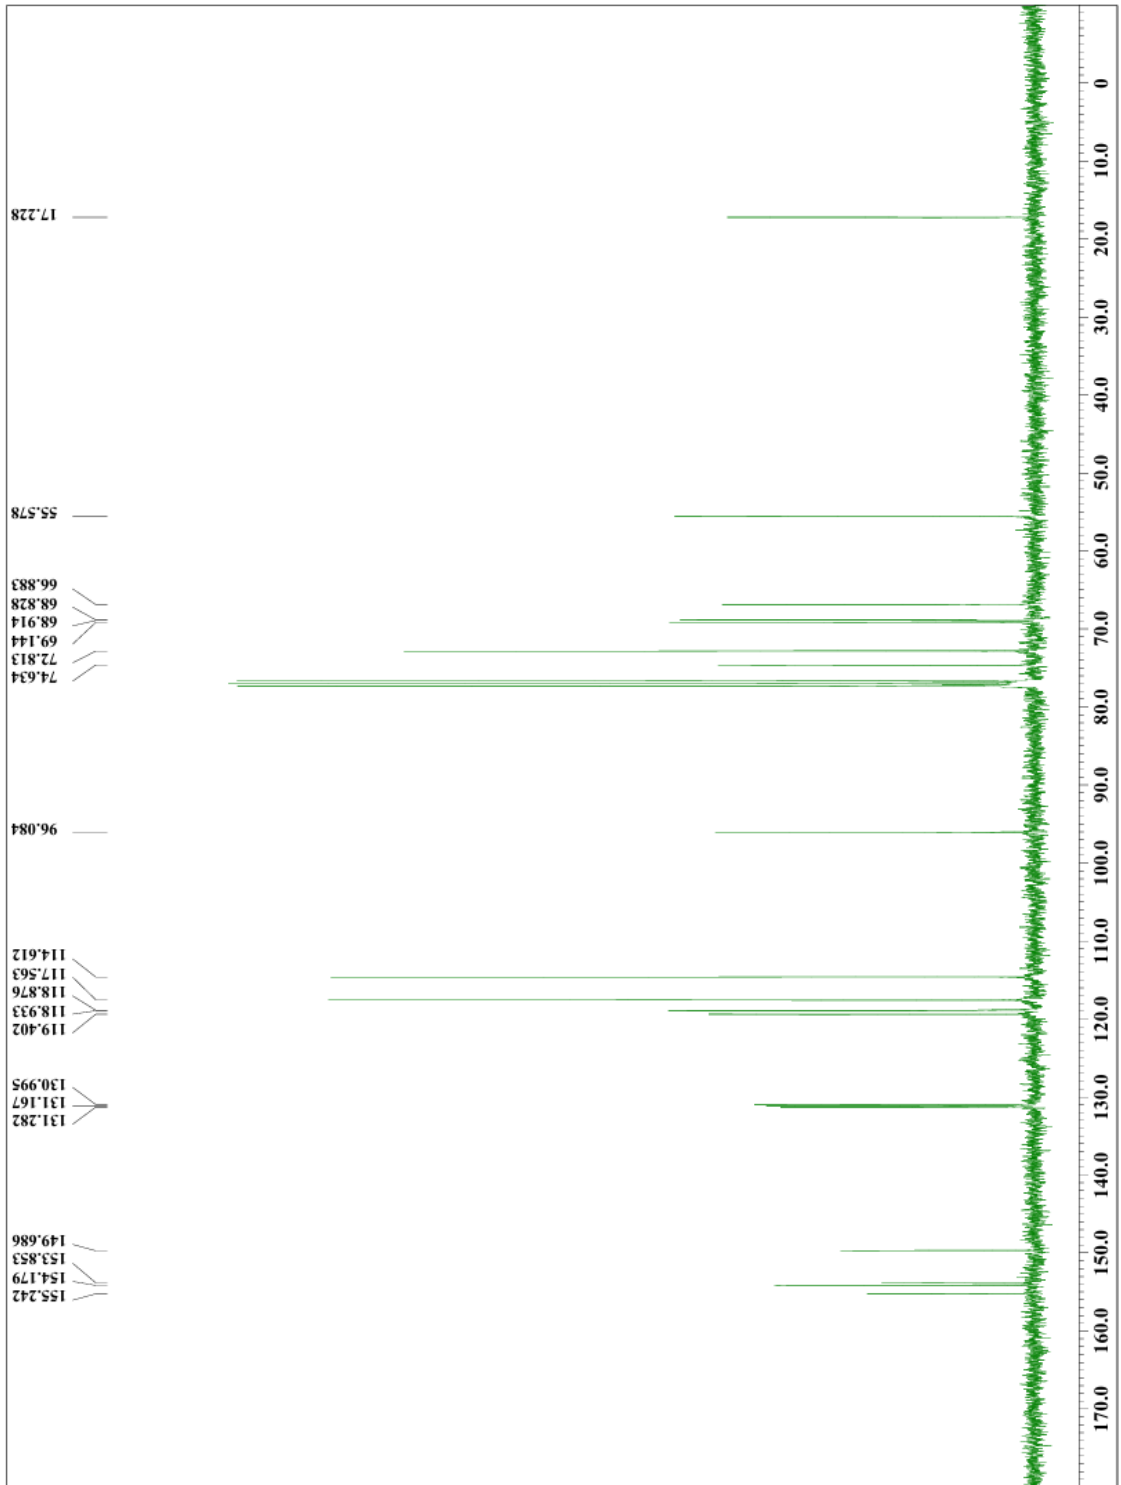

2,3,4-*O*-trialloc- $\alpha$ -L-rhamnopyranosyl *N*-phenyltrifluoroacetimidate (5)

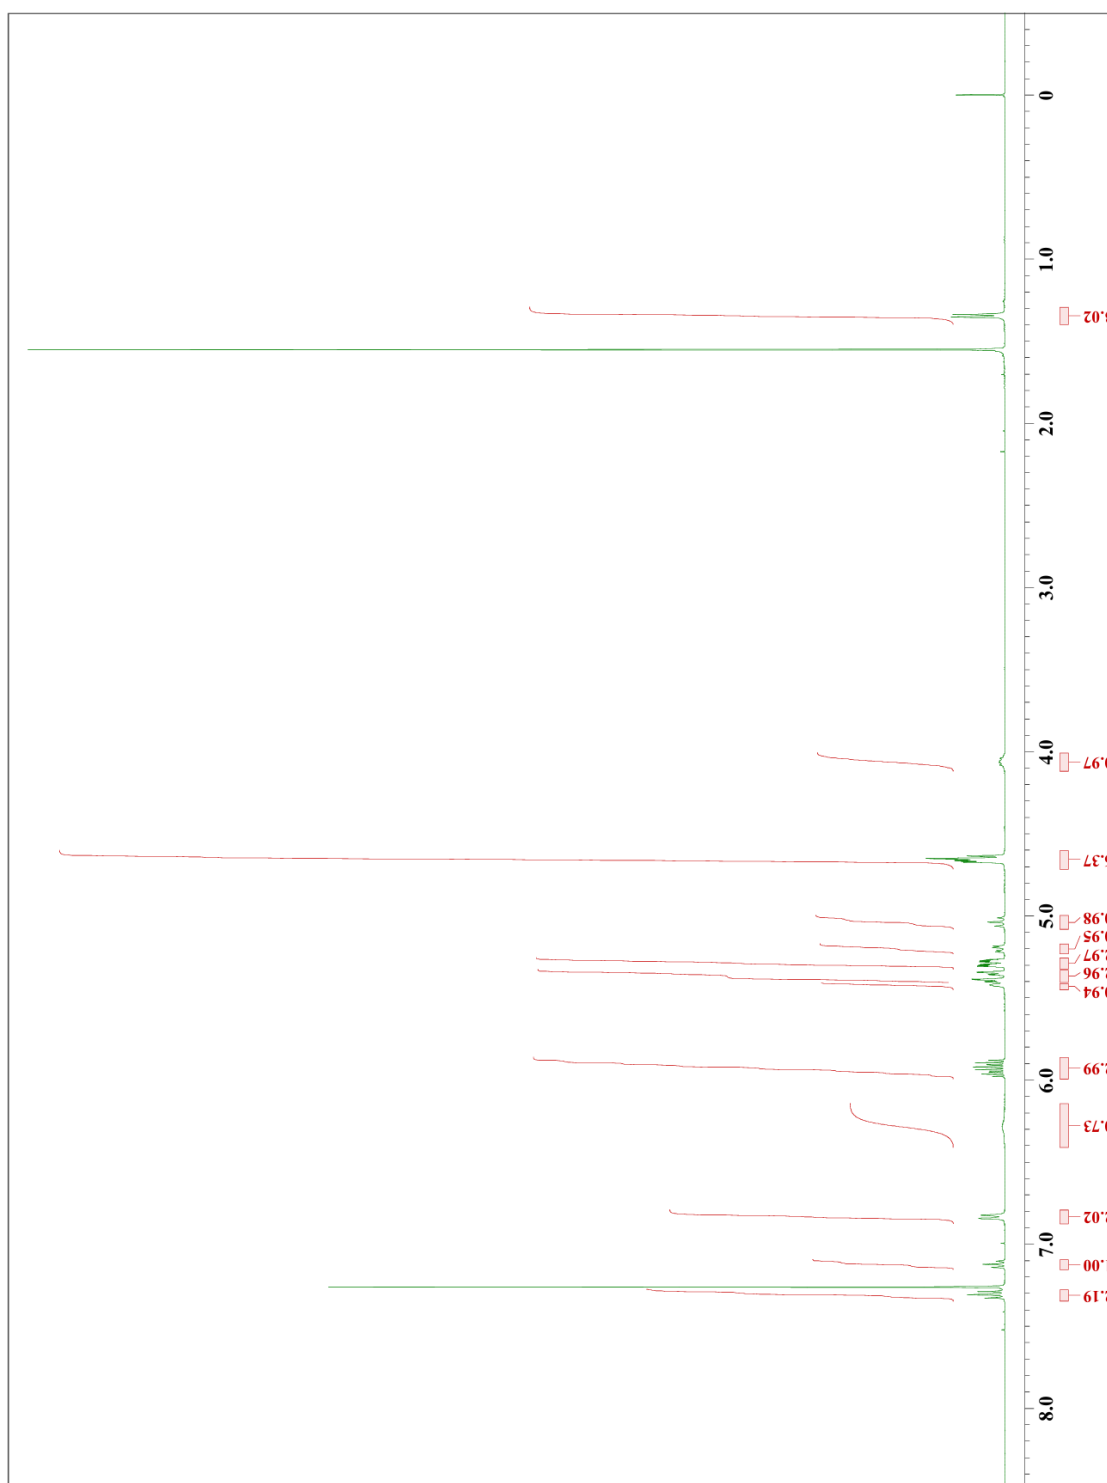

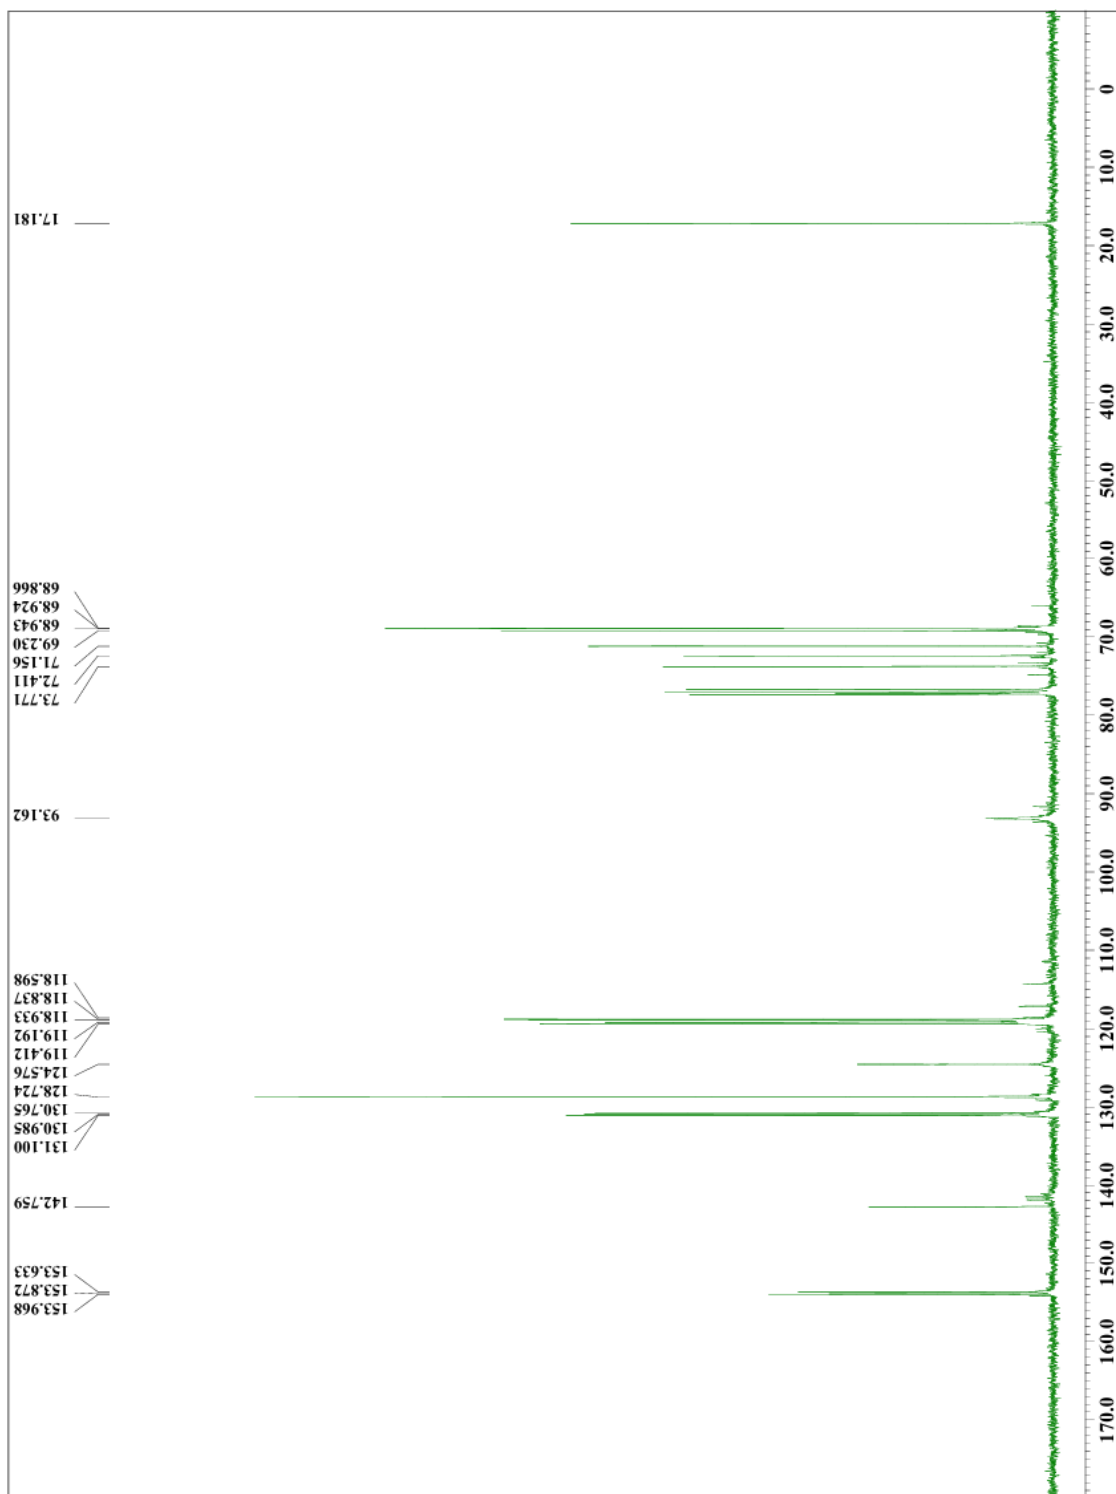

Supplement: d6cc02089e1.pdf [file d6cc02089e1.pdf]
